# Supplementary material for: Genome-wide off-target assessment on the arginine vasotocin receptor V1a2 knockout Scomber japonicus (chub mackerel)
Source: Research Square preprint supplement (doi:10.21203/rs.3.rs-7219894/v1), 2025-09-22
Supplement: Supplementary file 1 [file 042980ddb7f079570aec7bfd.xlsx]

## Sheet: 24sites
chr	variants_locus	ref_seq_NCBI	V1a2-KO_seq	TAL 1	TAL 2	TAL 1 Score	TAL 2 Score	TAL 1 Start	TAL 2 Start	Spacer Length	TAL 1 Target(Red:mismach)	TAL 2 Target(Red:mismach)	TAL 1 Target_mismach	TAL 2 Target_mismach	Total Score	Annotation_TYPE(priority:CDS>exon>gene>transcript), CDS&exon: Exonic	Gene_Name
NC_070582.1	15733001	CCTGCAGAGGAAGT	C	RVD2	RVD1	7.33	5.43	15732984	15733031	15	T GGAGGTGTTTGACTAT	T TCCGCTTCTATGGTCCA	0	0	12.76	CDS	gene_id "avpr1aa"; transcript_id "XM_053319488.1"; db_xref "GeneID:128359070"; gbkey "CDS"; gene "avpr1aa"; product "arginine vasopressin receptor 1Aa"; protein_id "XP_053175463.1"; exon_number "1";
NC_070583.1	6575363	C	T	RVD2	RVD2	11.84	14.66	6575345	6575398	22	T AGAACTCATTGACTAT	T AGAAATATATAAAAAT	5	8	26.5	gene	gene_id "ubash3bb"; transcript_id ""; db_xref "GeneID:128360213"; description "ubiquitin associated and SH3 domain containing Bb"; gbkey "Gene"; gene "ubash3bb"; gene_biotype "protein_coding";
NC_070598.1	17149066	G	A	RVD2	RVD2	10.82	16.55	17149043	17149094	20	T AGAGTTCTTTAACTAT	T GCACAGATTTAGCTAT	4	7	27.37	none
NC_070586.1	13107433	C	A	RVD2	RVD1	12.83	15.52	13107402	13107454	20	T CAAAGTGTTTTACAAT	T TCAATTTCAATGGTACA	5	5	28.35	gene	gene_id "LOC128365227"; transcript_id ""; db_xref "GeneID:128365227"; description "selenocysteine insertion sequence-binding protein 2-like"; gbkey "Gene"; gene "LOC128365227"; gene_biotype "protein_coding";
NC_070589.1	7330615	A	C	RVD2	RVD2	15.1	13.65	7330584	7330640	25	T TAAATTATTTCCCTAT	T GGACCAATTAGACTAT	7	5	28.75	gene	gene_id "klhl20"; transcript_id ""; db_xref "GeneID:128368515"; description "kelch-like family member 20"; gbkey "Gene"; gene "klhl20"; gene_biotype "protein_coding";
NC_070578.1	18297753	G	T	RVD2	RVD2	14.68	14.68	18297727	18297780	22	T TCACAGGTTTGACTAT	T CAATCTGTTTGACTAG	5	5	29.36	none
NC_070601.1	2434359	TTTTATATATTTATATA	T	RVD2	RVD2	15	14.7	2434324	2434379	24	T AGAAGGATTTGCCTCT	T ATAAATATATAAATAT	6	8	29.7	gene	gene_id "LOC128354623"; transcript_id "XM_053314847.1"; db_xref "GeneID:128354623"; exception "unclassified transcription discrepancy"; gbkey "mRNA"; gene "LOC128354623"; model_evidence "Supporting evidence includes similarity to: 17 Proteins"; note "The sequence of the model RefSeq transcript was modified relative to this genomic sequence to represent the inferred CDS: deleted 1 base in 1 codon"…
NC_070594.1	16507759	A	G	RVD2	RVD2	13.94	15.97	16507738	16507791	22	T GGACTTGTTTGTCTAT	T GCAGATGTTACAACAT	3	6	29.91	none
NC_070583.1	13334141	A	C	RVD2	RVD2	17.98	11.93	13334120	13334175	24	T GGAAGTATTCGATGAA	T GGAAATATCAGACTAT	6	5	29.91	gene	gene_id "si"; transcript_id ""; db_xref "GeneID:128360105"; description "sucrase-isomaltase (alpha-glucosidase)"; gbkey "Gene"; gene "si"; gene_biotype "protein_coding";
NC_070586.1	29957874	C	A	RVD2	RVD2	19.22	10.92	29957845	29957900	24	T GTAAATATTTAAGTGC	T GGAAAGATTTGACTAT	8	4	30.14	gene	gene_id "cabin1"; transcript_id ""; db_xref "GeneID:128365072"; description "calcineurin binding protein 1"; gbkey "Gene"; gene "cabin1"; gene_biotype "protein_coding";
NC_070582.1	27798456	C	T	RVD2	RVD2	13.57	16.61	27798427	27798483	25	T GAAAGTGTTTGTATAT	T TGAGTTAGCTGACTAT	4	5	30.18	none
NC_070582.1	14585891	G	A	RVD2	RVD2	17.09	13.19	14585861	14585917	25	T GCAACTATTAGATAAT	T CAAAATAATTGACAAT	7	7	30.28	none
NC_070580.1	15552975	G	A	RVD2	RVD2	18.01	12.52	15552956	15553000	13	T AAAAATGTTTTAAAGT	T GAAAGTATTTCAGTAT	8	5	30.53	none
NC_070587.1	23770138	A	T	RVD2	RVD1	18.57	12.1	23770113	23770164	19	T ACAGATAATTTAGTAA	T TCCCATTCTCTACTCCA	8	5	30.67	none
NC_070579.1	21541349	T	TATATATATATAATTA	RVD2	RVD2	17.6	13.08	21541320	21541367	16	T CAAAATCATTTACTGT	T ACAACTGTTTGATTAT	8	5	30.68	gene	gene_id "polq"; transcript_id "XM_053330268.1"; db_xref "GeneID:128369258"; gbkey "mRNA"; gene "polq"; model_evidence "Supporting evidence includes similarity to: 5 Proteins"; product "polymerase (DNA directed)
NC_070593.1	14876658	C	A	RVD2	RVD2	14.17	16.53	14876637	14876685	17	T GAAAGCATTTACCTAC	T AAAACTGTCTGAGTAC	7	7	30.7	gene	gene_id "tcf21"; transcript_id "XM_053337049.1"; db_xref "GeneID:128377142"; gbkey "mRNA"; gene "tcf21"; model_evidence "Supporting evidence includes similarity to: 18 Proteins"; product "transcription factor 21"; transcript_biotype "mRNA";
NC_070594.1	8749170	T	C	RVD2	RVD2	17.65	13.11	8749153	8749195	11	T AAAAATAAATGAATAG	T GCAAGTGTTTAAAAAT	9	5	30.76	none
NC_070590.1	17280884	T	A	RVD2	RVD2	11.68	19.08	17280850	17280900	19	T ACAGCTGTTTGACTCT	T AAAAGTCATGCACTCA	4	9	30.76	none
NC_070595.1	10719049	AT	A	RVD2	RVD2	17.93	12.83	10719016	10719068	21	T AGCTCCACTTCACTAT	T TGAGATATTTCACTAA	8	5	30.76	gene	gene_id "smurf1"; transcript_id "XM_053337786.1"; db_xref "GeneID:128378310"; experiment "COORDINATES: polyA evidence [ECO:0006239]"; gbkey "mRNA"; gene "smurf1"; model_evidence "Supporting evidence includes similarity to: 42 Proteins"; product "SMAD specific E3 ubiquitin protein ligase 1
NC_070578.1	14156131	C	T	RVD2	RVD2	16.47	14.3	14156110	14156159	18	T CAAAATGTTTAATTCA	T AAAAGTGTTTTAATAA	8	6	30.77	gene	gene_id "scamp5b"; transcript_id "XM_053316257.1"; db_xref "GeneID:128355848"; gbkey "mRNA"; gene "scamp5b"; model_evidence "Supporting evidence includes similarity to: 20 Proteins"; product "secretory carrier membrane protein 5b"; transcript_biotype "mRNA";
NC_070582.1	9244850	CAT	C	RVD2	RVD2	12.83	17.96	9244828	9244880	21	T ACAAGTGATTTACTAT	T TAAAGTGTGTAACAAG	5	7	30.79	gene	gene_id "LOC128359088"; transcript_id ""; db_xref "GeneID:128359088"; description "dynein axonemal intermediate chain 4-like"; gbkey "Gene"; gene "LOC128359088"; gene_biotype "protein_coding";
NC_070582.1	20106016	GTGAGT	G	RVD2	RVD1	18.05	12.77	20105995	20106043	16	T GAAGGTGAGTGGCTAC	T TCCCCTCCTCTAGTCCC	5	5	30.82	gene	gene_id "shank3a"; transcript_id "XR_008321421.1"; db_xref "GeneID:128358999"; gbkey "misc_RNA"; gene "shank3a"; model_evidence "Supporting evidence includes similarity to: 31 Proteins"; product "SH3 and multiple ankyrin repeat domains 3a
NC_070582.1	17928269	T	TGTGTGTGTGTGTGTGTGTGTGTGTGTGTGTCAGTGAGTGAGTGAGTGA	RVD2	RVD2	14.5	16.34	17928243	17928297	23	T GTATGTGTTTCACTCT	T CTAGATATCTGACTTT	4	6	30.84	none
NC_070593.1	13421735	G	T	RVD2	RVD2	9.18	21.71	13421700	13421752	21	T CAAAATATTTGACTAT	T GCCAGTTTGATACCAT	5	8	30.89	none

## Sheet: top1000_candidate_sites
NC_070582.1	RVD2	RVD1	7.33	5.43	15732984	15733031	15	T GGAGGTGTTTGACTAT	T TCCGCTTCTATGGTCCA	12.76
NC_070589.1	RVD2	RVD2	13.61	10.59	21871270	21871314	13	T AGAGGTTTTTGACCCT	T GGAGGCATTTCACTAT	24.2
NC_070592.1	RVD2	RVD2	10.25	14.37	924340	924388	17	T GAAAATGTTTGAATAT	T AAAATTATAAAACTAT	24.62
NC_070578.1	RVD2	RVD1	9.18	15.5	12227823	12227866	11	T GAAAATATTTCACTAT	T TCAGCTTTTATCATCTA	24.68
NC_070586.1	RVD2	RVD2	8.53	16.18	16594519	16594571	21	T AAAAATATTTAACTAT	T AAAGAAAAATGACTCT	24.71
NC_070587.1	RVD2	RVD2	16.34	8.53	6344114	6344161	16	T ATATGTATATAAATAT	T AAAAATATTTAACTAT	24.87
NC_070590.1	RVD2	RVD2	14.08	10.99	9048735	9048784	18	T AAACATCCTTTACTAT	T GAAAATGTTACACTAT	25.07
NC_070592.1	RVD2	RVD2	9.84	15.25	6161926	6161980	23	T GGACATATTTCACTAT	T ATAATTATTTGATTAT	25.09
NC_070586.1	RVD2	RVD2	14.3	10.82	11628674	11628715	10	T AAAAGTGTTTCAATAG	T GGAAATGTTTCACTCT	25.12
NC_070590.1	RVD2	RVD2	13.74	11.68	2759247	2759303	25	T GGAAGTGATCAACTAA	T GGACATTTTTCACTAT	25.42
NC_070585.1	RVD2	RVD2	14.86	10.79	25690884	25690934	19	T AAAAACATTTAAAAAT	T GAAACTGTTTGACCAT	25.65
NC_070598.1	RVD2	RVD2	12.99	12.83	23913748	23913795	16	T GAACATGTCAAACTAT	T TAAGATGTTTCACTAA	25.82
NC_070599.1	RVD2	RVD2	9.73	16.18	19274007	19274056	18	T GGAAATGTCTGACTAT	T ATAAGTAAATAACTAA	25.91
NC_070586.1	RVD2	RVD2	15.16	10.82	11626492	11626533	10	T AAACGTGTTTCAATAG	T GGAAATGTTTCACTCT	25.98
NC_070596.1	RVD1	RVD2	12.99	13.03	27430864	27430908	12	T TCCACTTATATGTGCCA	T TAAACAGTTTAACTAT	26.02
NC_070578.1	RVD2	RVD2	11.17	14.93	11473080	11473126	15	T AGAGATATTTGATTAT	T TGAACTGTTTCATTAT	26.1
NC_070592.1	RVD2	RVD2	14.25	11.93	17250730	17250771	10	T AAAACAATTTCACAAT	T GGAAGCATTTAACTAC	26.18
NC_070580.1	RVD2	RVD2	10.04	16.21	13509186	13509236	19	T CAAAATGTTTCACTAT	T TGAAATAATAAACTCT	26.25
NC_070591.1	RVD2	RVD2	14.7	11.58	22930816	22930871	24	T GCAAGTCTTTCACCAC	T GCAGATGTGTGACTAT	26.28
NC_070582.1	RVD2	RVD2	15.55	10.79	24422176	24422225	18	T AAACATTTTTAAAAAT	T CAAGGTGTTTAACCAT	26.34
NC_070585.1	RVD2	RVD2	10.45	15.94	21247967	21248017	19	T GAAGATATTTAAATAT	T AAAGAAGACTGACAAT	26.39
NC_070592.1	RVD2	RVD2	13.74	12.69	8299938	8299990	21	T GGAAGTGTAAAACCAT	T GAAAATATTTAAATCT	26.43
NC_070592.1	RVD2	RVD2	13.74	12.69	8288173	8288225	21	T GGAAGTGTAAAACCAT	T GAAAATATTTAAATCT	26.43
NC_070591.1	RVD2	RVD2	14.46	11.97	7945019	7945071	21	T AAAGATGCTCAAATAT	T TGAAATATTTGACAAT	26.43
NC_070583.1	RVD2	RVD2	11.84	14.66	6575345	6575398	22	T AGAACTCATTGACTAT	T AGAAATATATAAAAAT	26.5
NC_070580.1	RVD2	RVD2	13.88	12.63	9555476	9555519	12	T GTACATATTTCACAAT	T GTAGGTATTTCACAAT	26.51
NC_070596.1	RVD2	RVD2	8.33	18.26	6132886	6132935	18	T GAAAATATTTAACTAT	T ACACAAACACAACTAT	26.59
NC_070585.1	RVD2	RVD2	12.86	13.76	16281330	16281378	17	T GGCAATGTTTCACTCT	T CCACAACTTTGACTAT	26.62
NC_070591.1	RVD2	RVD2	13.39	13.24	32510128	32510177	18	T AAAACAATTTAACTAC	T GGAGATATTTGGCAAT	26.63
NC_070590.1	RVD2	RVD1	13.57	13.12	17740721	17740766	13	T AAAACTGTTTCAGTAT	T TCTACTTCAATTATCCA	26.69
NC_070589.1	RVD2	RVD1	11.02	15.74	20645754	20645797	11	T GTAAATCTTTAACTAT	T TGCCCTGATATAATCCA	26.76
NC_070582.1	RVD2	RVD2	9.77	17.04	8510049	8510098	18	T GTAGATGTTTAACTAT	T GCAAATAACTCACTAG	26.81
NC_070594.1	RVD2	RVD2	14.82	12	25676106	25676150	13	T GAAGATATTTCTATAT	T GGCAATGTTTAACTCT	26.82
NC_070579.1	RVD2	RVD2	14.5	12.32	28135406	28135457	20	T GGACATATTTAGCCAT	T CAAGGTGTTTAAGTAT	26.82
NC_070581.1	RVD2	RVD1	12.37	14.48	27537509	27537563	22	T AAAAATGTTTACCTAA	T TCAGCTCAAATAATCCA	26.85
NC_070595.1	RVD2	RVD2	15.22	11.64	25721306	25721354	17	T AATAATCTTTAAATAT	T GCAGATCTTTGACTAA	26.86
NC_070579.1	RVD2	RVD2	13.51	13.45	36795138	36795188	19	T GAAAAACTTTAAATAT	T GGAGCTCTTTGACCAC	26.96
NC_070588.1	RVD2	RVD2	12.04	14.95	18931298	18931340	11	T GAAACTACTTCACTAT	T GCCAGTGTTTGAAAAT	26.99
NC_070589.1	RVD2	RVD2	12.01	15.03	34115380	34115421	10	T ATATATGTTTAACTAT	T AAATGACTTTAACTAC	27.04
NC_070578.1	RVD2	RVD2	13.13	13.97	32467718	32467766	17	T GGAAATATGTAACTAA	T GGAATTAATCAACTAT	27.1
NC_070585.1	RVD2	RVD2	16.17	10.99	2380900	2380949	18	T CAAAGTGTTCCAAAAT	T CAAAATGTTTGACCAT	27.16
NC_070585.1	RVD2	RVD2	12.09	15.08	23198677	23198723	15	T TGAAATGTTTGAATAT	T GCAAATAGTTCACTCT	27.17
NC_070578.1	RVD1	RVD2	15.24	11.98	4557268	4557313	13	T TCCACCTCTATTGTTAA	T AAAACTGTTTGACTAG	27.22
NC_070580.1	RVD1	RVD2	13.67	13.65	21131193	21131240	15	T TTCGCTTCTACGGGCCA	T GCACGTATTTGACCAA	27.32
NC_070595.1	RVD2	RVD2	12.99	14.34	20036153	20036196	12	T GCAAACGTATAACTAT	T AAAAAAGCTCAACTAT	27.33
NC_070598.1	RVD2	RVD2	10.82	16.55	17149043	17149094	20	T AGAGTTCTTTAACTAT	T GCACAGATTTAGCTAT	27.37
NC_070595.1	RVD2	RVD2	13.84	13.55	11044819	11044869	19	T GACGTTGTTTACCTAT	T CGAAATATTTACATAT	27.39
NC_070597.1	RVD2	RVD2	10.53	16.87	10703588	10703635	16	T AAAAACATTTAACTAT	T ATAGACCTTATACTAT	27.4
NC_070590.1	RVD2	RVD1	13.72	13.69	22958573	22958618	13	T GCCAGTTTTTCACTAT	T TCCAGTTCTACAGTCAA	27.41
NC_070597.1	RVD2	RVD2	14.18	13.23	16781193	16781242	18	T AAAAATGGTTCACTAA	T ACAAGTATTCACCTAT	27.41
NC_070586.1	RVD2	RVD2	10.33	17.1	22834069	22834121	21	T AAAAATGTTTAACAAT	T GCAGGTGGTTAACATT	27.43
NC_070596.1	RVD2	RVD2	18.45	8.98	15240294	15240347	22	T GAATATATTGAATTCT	T AGAGCTATTTAACTAT	27.43
NC_070579.1	RVD2	RVD2	19.35	8.13	3066131	3066175	13	T AGAGATCTTTGGGTTT	T AAAGATATTTGACTAT	27.48
NC_070588.1	RVD2	RVD2	15.12	12.37	4958072	4958121	18	T CGAAGTGCTTAAACAT	T ATAAATATTTAACTAC	27.49
NC_070588.1	RVD2	RVD1	12.13	15.38	13605082	13605132	18	T AGAAGTAATCAACTAT	T TCCCCTTACATTATCAA	27.51
NC_070586.1	RVD2	RVD2	16.18	11.37	11204160	11204203	12	T AAAAGTATACGACCCT	T AAAAATGTTTGATTAT	27.55
NC_070588.1	RVD2	RVD2	19.84	7.73	18456640	18456688	17	T GAAGATGTTTCAGATA	T AAAGGTGTTTGACTAT	27.57
NC_070596.1	RVD1	RVD2	14.83	12.79	27429860	27429904	12	T TCCTCTTATATGTGCCA	T GAAACAGTTTGACCAT	27.62
NC_070580.1	RVD2	RVD2	13.48	14.17	35637479	35637532	22	T ACAAATCTTTAATTAT	T ATAAAAGTTCAACTAT	27.65
NC_070590.1	RVD2	RVD1	14.64	13.11	16483468	16483520	20	T GGAACTGGTTCACTAA	T TCTACTACTCTAGTCCA	27.75
NC_070596.1	RVD2	RVD2	11.88	15.87	25792277	25792320	12	T GCAATTCTTTAACTAT	T AAAAGTACATAAGTAT	27.75
NC_070592.1	RVD2	RVD2	13.97	13.78	29173264	29173315	20	T GGAAACGTTTAACTCA	T ACAAGAGTTTGACTAG	27.75
NC_070590.1	RVD2	RVD2	10.65	17.16	14421195	14421247	21	T GAAAATATTTAAATAT	T GTCAGTTTTTGACTTT	27.81
NC_070584.1	RVD2	RVD2	16.63	11.19	15784039	15784081	11	T GAACATGATTGAATTT	T ACAAATGTCTAACTAT	27.82
NC_070595.1	RVD2	RVD2	15.89	11.93	13272520	13272561	10	T CAAAATATTGAGCTAT	T GAAAATGTATGACTAA	27.82
NC_070601.1	RVD2	RVD2	16.43	11.44	12347868	12347910	11	T GGAGCTGTTAAAATGT	T GGAGGTCTTCCACTAT	27.87
NC_070590.1	RVD2	RVD2	18.71	9.18	29012839	29012894	24	T AAAACAATTAGTCAAT	T AAAAATCTTTGACTAT	27.89
NC_070594.1	RVD2	RVD2	15.45	12.45	16116924	16116976	21	T GGACGTCTATGACAAA	T GAAAATGTTCAAATAT	27.9
NC_070590.1	RVD2	RVD2	14.66	13.24	24062695	24062740	14	T GAAAATATACAAATAT	T GGTGATGTATAACTAT	27.9
NC_070593.1	RVD2	RVD2	16.54	11.39	18346167	18346220	22	T ACTGTTACTTAACTAT	T AAAACTATTAAACTAT	27.93
NC_070579.1	RVD2	RVD2	12.84	15.09	4146724	4146766	11	T CCAGATGTTTAACGAT	T GCAGACCTTTAATTAT	27.93
NC_070586.1	RVD2	RVD2	12.59	15.35	10851878	10851928	19	T GGAGATCTTTGACCAC	T GAATAACTTTAAATAT	27.94
NC_070586.1	RVD2	RVD2	12.59	15.35	10903587	10903637	19	T GGAGATCTTTGACCAC	T GAATAACTTTAAATAT	27.94
NC_070591.1	RVD2	RVD1	13.88	14.06	9279211	9279254	11	T CGACATGTTTACCTAC	T TGCCCCTCTCTGGTCCA	27.94
NC_070579.1	RVD2	RVD2	14.3	13.68	16751789	16751831	11	T AAAGGTTTTTAAATAA	T ACATGCGTTTCACTAT	27.98
NC_070587.1	RVD2	RVD2	13.97	14.01	16252063	16252119	25	T AAAGGTATTTGCCAAC	T GTAAATATATGACTCT	27.98
NC_070583.1	RVD2	RVD2	12.53	15.49	17067395	17067447	21	T AAAAAAATATAACTAT	T GCAGGACTTTTACTAA	28.02
NC_070589.1	RVD2	RVD2	12.01	16.02	34143869	34143910	10	T TTAAATGTTTAACTAT	T AAATGGCTTTAACTAC	28.03
NC_070589.1	RVD2	RVD2	15.03	13.03	33647058	33647113	24	T ATAAATGTTACACTAC	T ATAAATGTTACACTAT	28.06
NC_070582.1	RVD2	RVD2	15.89	12.17	18696687	18696738	20	T TAATGTATTTTACTCT	T ATAAATGTTTAACTAC	28.06
NC_070594.1	RVD2	RVD2	13.66	14.41	3702420	3702461	10	T AGAAATGATTAAGTAT	T AAAATTAATTAACTCT	28.07
NC_070593.1	RVD2	RVD2	16.31	11.77	18609607	18609660	22	T GGAGATCTTCAACTGC	T GAAGGTAATTGACTCT	28.08
NC_070590.1	RVD2	RVD2	14.34	13.75	4265862	4265909	16	T GTAAATGTTTCACTGT	T AAAACTCTTTAACTTT	28.09
NC_070600.1	RVD2	RVD1	14.44	13.67	22433391	22433438	15	T GCAGGTGCTTCACGAT	T TCCGTTTCTACGGGCCA	28.11
NC_070595.1	RVD2	RVD2	14.14	13.97	20199430	20199479	18	T TCAAGTGTTTGACTTT	T TGAAATGTTAAACTAC	28.11
NC_070588.1	RVD2	RVD2	11.64	16.5	64155	64203	17	T AAAGATGTTTAACTTT	T ATAAATAAATGAATAT	28.14
NC_070582.1	RVD2	RVD2	13.15	15.03	21279936	21279986	19	T CAAGATGTTTTAATAT	T TCAAGTAATTAACTAA	28.18
NC_070581.1	RVD2	RVD2	14.5	13.68	32510971	32511012	10	T GAAAATGTTTCACTGC	T GTAAATATTTATCTAT	28.18
NC_070592.1	RVD2	RVD2	8.33	19.85	27335395	27335451	25	T AAAAATGTTTAACTAT	T AATTGTATTATAATAT	28.18
NC_070583.1	RVD2	RVD2	14.21	13.98	13682424	13682467	12	T GAAACTTTTTCAATAT	T AAAGAGGATTCACTAT	28.19
NC_070598.1	RVD2	RVD2	12.13	16.07	6234497	6234549	21	T AAAAGTGATTAACTAC	T CAAGGTATCTTATTAT	28.2
NC_070601.1	RVD2	RVD2	11.77	16.44	12688127	12688180	22	T GAATATGTATGACTAT	T ACAGATATTAAATTAC	28.21
NC_070583.1	RVD2	RVD1	20.06	8.15	23597992	23598043	19	T GAACATTTTTATCTTC	T TCAGCTTCTATAATCCA	28.21
NC_070586.1	RVD2	RVD2	16.44	11.77	14291918	14291967	18	T ACAGATATTTAATCAC	T GGCAGTATTTGACTAA	28.21
NC_070584.1	RVD2	RVD2	15.23	12.99	17272685	17272737	21	T CAATACATTTAACTAA	T ACAGATATTAGACAAT	28.22
NC_070586.1	RVD2	RVD2	11.77	16.46	33645021	33645070	18	T GAATGTATTTGACAAT	T GGAAGTATAGAAGTAT	28.23
NC_070583.1	RVD2	RVD2	11.22	17.03	5258755	5258807	21	T AAATATATTTCACTAT	T ACTAATATATGAATAT	28.25
NC_070580.1	RVD2	RVD2	11.73	16.54	7128521	7128571	19	T GGAAGTGTAAAACTAT	T CAAAGTATTTTTCTAA	28.27
NC_070601.1	RVD2	RVD2	15.07	13.23	14988796	14988843	16	T ATATATATTTCACAAT	T ATAAATATCTCACTAT	28.3
NC_070583.1	RVD2	RVD2	14.73	13.57	38268303	38268359	25	T GAAAGAGTGTGACCAT	T GGATGTGATTAACTAC	28.3
NC_070578.1	RVD2	RVD2	11.93	16.38	378307	378352	14	T AAAGGAAATTGACTAT	T ACATGTTTTTATCTAT	28.31
NC_070585.1	RVD2	RVD2	14.18	14.13	2861598	2861643	14	T AAACAGATCTGACTAT	T TGAAATGTTTGCATAT	28.31
NC_070594.1	RVD2	RVD2	15.27	13.06	6473621	6473670	18	T AACAGTATTTCACTCA	T GAACTTATTTAACTCT	28.33
NC_070582.1	RVD2	RVD2	16.21	12.13	26739127	26739181	23	T GACAATAACTGCCTAT	T GAAAATAAATGACTAT	28.34
NC_070582.1	RVD2	RVD2	7.73	20.62	19844104	19844147	12	T GGAAGTGTTTAACTAT	T AAATATACTGAATTAA	28.35
NC_070581.1	RVD2	RVD2	9.18	19.17	10632704	10632756	21	T AAAAGTATTTCACTAT	T GCACATTTTTACTTAA	28.35
NC_070586.1	RVD2	RVD1	12.83	15.52	13107402	13107454	20	T CAAAGTGTTTTACAAT	T TCAATTTCAATGGTACA	28.35
NC_070590.1	RVD2	RVD2	15.25	13.11	23627708	23627756	17	T GGAAATGATAGACTTT	T GGAAACCTTTGAATAT	28.36
NC_070587.1	RVD2	RVD2	19.85	8.53	6344108	6344161	22	T ATATATATATGTATAT	T AAAAATATTTAACTAT	28.38
NC_070601.1	RVD2	RVD1	13.03	15.37	7436092	7436136	12	T AGAGATATTTCACTCA	T ACCACTACCATGATGCA	28.4
NC_070599.1	RVD2	RVD2	12.25	16.18	3707543	3707590	16	T GGAGAAATTTAAATAT	T GATGCTTTTTTACTAT	28.43
NC_070583.1	RVD2	RVD2	13.45	15.02	36564679	36564729	19	T GGAGCTCTTTGACCAC	T GAAAATCTTTAAATGT	28.47
NC_070598.1	RVD2	RVD2	12.25	16.22	27575939	27575984	14	T AAAAGTGTTTGAACAT	T ACAGCTGTCTCTCTAT	28.47
NC_070585.1	RVD2	RVD2	16.22	12.25	4253908	4253953	14	T ACAGCTGTCTCTCTAT	T AAAAGTGTTTGAACAT	28.47
NC_070585.1	RVD2	RVD2	16.22	12.25	4402739	4402784	14	T ACAGCTGTCTCTCTAT	T AAAAGTGTTTGAACAT	28.47
NC_070583.1	RVD2	RVD2	13.45	15.02	36623600	36623650	19	T GGAGCTCTTTGACCAC	T GAAAATCTTTAAATGT	28.47
NC_070590.1	RVD2	RVD2	14.6	13.88	16404815	16404858	12	T ACAACTATTTAAATCT	T ATACATGTTTCACAAT	28.48
NC_070587.1	RVD2	RVD2	12.18	16.31	5745674	5745723	18	T ACAAATGTTGAACTAT	T GGACAGATTTAAACAT	28.49
NC_070578.1	RVD2	RVD2	15.71	12.79	34545888	34545929	10	T GGAGCTGCTTGAAGAT	T GAACGTGATTAACAAT	28.5
NC_070594.1	RVD2	RVD2	16.77	11.73	26245971	26246015	13	T GGAGACAGTTTACAAT	T GAAGATGCTTGACTAA	28.5
NC_070597.1	RVD2	RVD2	13.28	15.23	17439170	17439221	20	T AGATGTGTTTATCTAT	T CAAATTATATAACTAA	28.51
NC_070585.1	RVD2	RVD2	14.7	13.81	18862254	18862296	11	T AAAGCTATTCAACTTT	T TGCAGTATTTGACCAT	28.51
NC_070591.1	RVD2	RVD2	12.18	16.34	32842990	32843031	10	T CAAAATGTTGAACTAT	T GGAATTCTTTAACTTC	28.52
NC_070580.1	RVD1	RVD2	13.94	14.59	19207729	19207784	23	T ACCCCTTTTATAGCCCA	T GGAGGCCATAAACTAT	28.53
NC_070596.1	RVD2	RVD2	13.31	15.22	20323643	20323698	24	T CAAAATGTTTGAATAA	T TGAAATGATTAATTAT	28.53
NC_070594.1	RVD2	RVD2	11.53	17.01	6925629	6925675	15	T GGAGGTGCTAAACTAT	T AAAATTGTATTACTAG	28.54
NC_070582.1	RVD2	RVD2	14.08	14.46	8645705	8645751	15	T AACAATATTTAACTTT	T GAAAATGATTAAACAT	28.54
NC_070593.1	RVD2	RVD2	16.18	12.36	2300213	2300264	20	T CAAACTGTTTCCTTAT	T CAAACTGTTTAAATAT	28.54
NC_070580.1	RVD2	RVD2	13.19	15.38	32662073	32662121	17	T AAACAAATTTGACCAT	T GGAAACATTTAATTAA	28.57
NC_070581.1	RVD2	RVD2	12.99	15.59	21935338	21935392	23	T GGAAATATTTCACAAA	T CAACATGTTTACCTTT	28.58
NC_070585.1	RVD2	RVD2	14.87	13.76	16267373	16267421	17	T GGCAACGTTTCACTCT	T CCACAACTTTGACTAT	28.63
NC_070585.1	RVD2	RVD2	14.87	13.76	16322789	16322837	17	T GGCAACGTTTCACTCT	T CCACAACTTTGACTAT	28.63
NC_070585.1	RVD2	RVD2	14.87	13.76	16312778	16312826	17	T GGCAACGTTTCACTCT	T CCACAACTTTGACTAT	28.63
NC_070591.1	RVD2	RVD2	16.38	12.25	3338705	3338756	20	T AAAGATAAATACCAAT	T GGAGATAATTAAATAT	28.63
NC_070585.1	RVD2	RVD2	14.87	13.76	16287583	16287631	17	T GGCAACGTTTCACTCT	T CCACAACTTTGACTAT	28.63
NC_070601.1	RVD2	RVD2	15.25	13.39	1459057	1459111	23	T GGAAAGATATGAATAT	T AAAACTATAAAACTAT	28.64
NC_070599.1	RVD2	RVD2	13.66	15.01	25568715	25568766	20	T GGAGGCGTTTGAAAAT	T GAAAGTGTTTGCTCAT	28.67
NC_070583.1	RVD2	RVD2	11.51	17.16	3785563	3785610	16	T AAAAGTCTTTAAATAT	T GCAGTTATATAAAAAT	28.67
NC_070583.1	RVD2	RVD2	14.66	14.01	17045535	17045578	12	T AAAAGTACATAAATAT	T GTAATAATTTAACTAT	28.67
NC_070596.1	RVD2	RVD2	16.25	12.45	31050525	31050570	14	T AAACACATTCCACTAC	T AAAGACATTTGAATAT	28.7
NC_070592.1	RVD2	RVD2	16.04	12.66	3058859	3058909	19	T GAAGATGCCTCATTAT	T GGAAGTCTTTTACTCT	28.7
NC_070587.1	RVD2	RVD2	15.19	13.51	13766203	13766244	10	T GCAACTGTTTGTCTCT	T GAACATATTTAAATAC	28.7
NC_070579.1	RVD2	RVD2	14.66	14.05	24850616	24850665	18	T AAAAGTAATTAAATAA	T ACAAATGTTCCACTAA	28.71
NC_070599.1	RVD2	RVD2	12.86	15.85	14481356	14481405	18	T GCATTTATTTAACTAT	T AAAGATATTAATCTAA	28.71
NC_070580.1	RVD2	RVD2	8.33	20.4	20012686	20012727	10	T AAAAGTATTTAACTAT	T ATTCCTGTGAAACTAT	28.73
NC_070595.1	RVD2	RVD1	18.34	10.39	25187806	25187852	14	T AAATGCACTTTAATAT	T TACACTTCTCTAATCCA	28.73
NC_070579.1	RVD2	RVD2	16.28	12.45	27651141	27651187	15	T GGCAATGTTGGTCTAT	T GGAAATATTTAAAAAT	28.73
NC_070579.1	RVD2	RVD2	9.38	19.36	19710405	19710459	23	T AAAACTATTTAACTAT	T GAAAATGTACCCACAT	28.74
NC_070583.1	RVD2	RVD2	16.81	11.93	24724982	24725035	22	T AGCAGTGTGGCACTAT	T GAAAATGTTTGACCAC	28.74
NC_070592.1	RVD2	RVD2	14.7	14.05	17406664	17406714	19	T ACAAGTATTTAACATT	T CAAACTGTTAAACTAA	28.75
NC_070592.1	RVD2	RVD2	12.65	16.1	979998	980042	13	T AAAAATGTATAAATAT	T ATAGATGTATGAATAC	28.75
NC_070589.1	RVD2	RVD2	15.1	13.65	7330584	7330640	25	T TAAATTATTTCCCTAT	T GGACCAATTAGACTAT	28.75
NC_070587.1	RVD2	RVD2	8.33	20.43	2413488	2413537	18	T AAAAATGTTTAACTAT	T CAAAATAGAAAACACT	28.76
NC_070600.1	RVD2	RVD2	13.86	14.9	20396946	20396989	12	T AAAAGTACTTAAGTAT	T GCAACCCTTTAACTAC	28.76
NC_070587.1	RVD2	RVD2	16.11	12.65	29626486	29626537	20	T GTATCTATTTAATTAT	T AAAAATGTTTAAAAAT	28.76
NC_070594.1	RVD2	RVD2	15.94	12.83	28230793	28230839	15	T GAAGGTACAAAACAAT	T GAACATTTTAGACTAT	28.77
NC_070580.1	RVD2	RVD2	12.29	16.5	28050862	28050911	18	T GTAAATATTTGAATAT	T GAAGATATTTACAAAC	28.79
NC_070584.1	RVD2	RVD2	16.27	12.53	5969141	5969193	21	T AAAGGTATTTCCTTAA	T AAAAAAATTTAACCAT	28.8
NC_070593.1	RVD2	RVD2	15.35	13.46	3740755	3740804	18	T TAAACTACTTGAATAT	T AGAGATATTTGAGCAT	28.81
NC_070589.1	RVD2	RVD2	17.38	11.44	8789328	8789372	13	T AGAAAAATTAGATCAT	T AGAGGTATTTAACTTT	28.82
NC_070588.1	RVD2	RVD2	17.2	11.63	14646093	14646146	22	T CAAAAAGTCAAACCAT	T GCAGGTGTTTGATTAT	28.83
NC_070596.1	RVD2	RVD2	10.65	18.18	15557020	15557073	22	T AGAAATATTTAAATAT	T AAACATATTTACTTTT	28.83
NC_070593.1	RVD2	RVD2	14.97	13.87	23708440	23708491	20	T GGAAAGGTTTAACTCC	T GGACTTATTTGATTAT	28.84
NC_070582.1	RVD1	RVD2	14.74	14.1	34627864	34627912	16	T TCCTCCCCCATCATCCA	T GCAAGTGTATGGCTAT	28.84
NC_070584.1	RVD2	RVD2	12.99	15.85	370347	370389	11	T GCAAAAGTCTAACTAT	T GAAAATACTTAACATT	28.84
NC_070590.1	RVD2	RVD1	15.93	12.92	32080524	32080581	25	T CTATCTATCTAACTAT	T TCCATTTCTACTGTCCA	28.85
NC_070589.1	RVD1	RVD2	12.92	15.93	1434584	1434641	25	T TCCATTTCTACTGTCCA	T CTATCTATCTAACTAT	28.85
NC_070590.1	RVD2	RVD2	16.02	12.83	20168616	20168667	20	T GCAGGACTTTCACTGT	T GCAGTTATTCAACTAT	28.85
NC_070599.1	RVD2	RVD2	13.35	15.52	12308299	12308347	17	T GAACATTTTTAAATAT	T ACAAATGTTTAAAAAA	28.87
NC_070588.1	RVD2	RVD2	12.95	15.92	10810070	10810115	14	T TGAGCTATTTGAATAT	T TCAAGAATTTCACTCT	28.87
NC_070580.1	RVD2	RVD2	14.17	14.7	5141012	5141065	22	T ATAGATATCTAACAAT	T AAAAATCTTTGACTGC	28.87
NC_070579.1	RVD2	RVD2	19.9	8.98	29416951	29417002	20	T TAAGTTATTTTACACA	T GCAAATGTTTAACTAT	28.88
NC_070579.1	RVD2	RVD2	17.24	11.64	20984174	20984223	18	T AAATAACTTTAACAAC	T GAAGCTGTTTCACCAT	28.88
NC_070599.1	RVD2	RVD2	11.39	17.5	13532029	13532070	10	T CAAAATATTTAACCAT	T TCATGGTTTTGACTAT	28.89
NC_070580.1	RVD2	RVD1	12.96	15.93	19625066	19625117	19	T AAAAGTTGTTGACTAT	T GCCACATCTCTCACCCA	28.89
NC_070586.1	RVD2	RVD2	13.13	15.77	21995281	21995335	23	T AAAAATGTGTGACTAC	T AAAGGAGTTTAAATGT	28.9
NC_070578.1	RVD2	RVD2	12.37	16.53	4731630	4731680	19	T AAAAGTATTTAACTCA	T GGAAGTATTTTATTGT	28.9
NC_070593.1	RVD2	RVD2	12.93	15.98	31669868	31669919	20	T GAAAGTGTTCAACTAG	T GTTGCTGTTTTACTAT	28.91
NC_070587.1	RVD2	RVD2	15.15	13.77	17755527	17755571	13	T ACAAGTGTATGCATAT	T GTAGGTATTCAACAAT	28.92
NC_070585.1	RVD2	RVD2	11.88	17.04	32484138	32484188	19	T GAACCTGTTTAACTCT	T AGACACTATAAACTAT	28.92
NC_070588.1	RVD2	RVD2	13.04	15.89	29826019	29826071	21	T GGTGGAGTTTAACTAT	T TAAAGTCTTTCACCAA	28.93
NC_070588.1	RVD2	RVD2	15.89	13.04	29648910	29648962	21	T TAAAGTCTTTCACCAA	T GGTGGAGTTTAACTAT	28.93
NC_070582.1	RVD2	RVD2	12.95	15.98	24507244	24507287	12	T AGACTTGTTTGAATAT	T AGAAGATTTAAACTAC	28.93
NC_070588.1	RVD2	RVD2	13.04	15.89	29558307	29558359	21	T GGTGGAGTTTAACTAT	T TAAAGTCTTTCACCAA	28.93
NC_070589.1	RVD2	RVD1	12.95	15.98	3401889	3401941	20	T ACAGTTGTTTGAATAT	T TCCATTTCCAATCTCCA	28.93
NC_070592.1	RVD2	RVD2	15.25	13.68	1482384	1482439	24	T TAAAATGTTTTATTAT	T TGACGTCATTAACTAT	28.93
NC_070578.1	RVD2	RVD2	15.49	13.45	21764291	21764339	17	T AAAGTTATATGACTTT	T GAAAGTATTTAAAGAT	28.94
NC_070586.1	RVD1	RVD2	15.79	13.16	11173830	11173873	11	T TCAAATTCTGCGGTCCA	T AAAAGTTGTTAACTAT	28.95
NC_070588.1	RVD2	RVD2	14.12	14.83	27789758	27789808	19	T GAAGGACTTTGAGTAT	T CAAAGTGCTTTACTAA	28.95
NC_070582.1	RVD2	RVD2	12.95	16.01	27384655	27384700	14	T GAAGCTGTTTTAATAT	T AAAGGTATTTTACACA	28.96
NC_070587.1	RVD2	RVD2	18.17	10.79	28253513	28253559	15	T GAAAACATTCAGATAT	T GAAGGAATTTCACTAT	28.96
NC_070594.1	RVD2	RVD2	14.82	14.14	15914016	15914062	15	T GGAGATGTGTCATTAT	T AAAGATGAAAAACTAT	28.96
NC_070581.1	RVD2	RVD2	17.04	11.93	6993008	6993058	19	T GTAAATCAATAACCAT	T AAAAGAGTTTGACTAA	28.97
NC_070595.1	RVD2	RVD2	15.43	13.55	23863125	23863173	17	T AACAATAATTCACAAT	T CAAAATGTTTAAATCT	28.98
NC_070594.1	RVD2	RVD2	12.69	16.3	25022438	25022494	25	T AAATATATTTAAATAT	T GAAGATTTTTAAAAAA	28.99
NC_070593.1	RVD2	RVD2	18.38	10.62	16639237	16639290	22	T TGACTTATTTAACTTC	T GGAAGTCTTTGACTCT	29
NC_070599.1	RVD2	RVD2	17.03	11.97	9951560	9951608	17	T CATGACATTTAAATAT	T TAAAATGTTTGACAAT	29
NC_070584.1	RVD2	RVD2	8.13	20.87	7364480	7364526	15	T AAAGATGTTTAACTAT	T ACATGTAATCATATAT	29
NC_070596.1	RVD2	RVD2	15.03	13.97	32566561	32566616	24	T GAAGACCTTTAACTCA	T GTAAATATCTGACCAT	29
NC_070584.1	RVD2	RVD2	15.69	13.31	24308328	24308372	13	T ATAAGTATTTATCCAT	T GAAGATCTTTAAAAAT	29
NC_070600.1	RVD2	RVD2	10.13	18.89	20809524	20809570	15	T GAAAATGTTAAACTAT	T AATGATGTATAATAAT	29.02
NC_070590.1	RVD2	RVD2	11.78	17.25	16896033	16896089	25	T CAAAGTGTGTGACTAT	T TACAGTGTCTAATTAT	29.03
NC_070587.1	RVD2	RVD2	17.06	11.97	13129635	13129683	17	T ATAGATGTTTTATTAC	T GACAATGTATGACTAT	29.03
NC_070580.1	RVD2	RVD2	18.06	10.99	7819862	7819915	22	T CAAGCTAACAAACAAT	T GAAGATATTTCACTAA	29.05
NC_070594.1	RVD2	RVD2	18.9	10.16	20320175	20320220	14	T TTAGATGTTTTATTAC	T GACAATATTTGACTAT	29.06
NC_070600.1	RVD2	RVD2	13.97	15.09	18058667	18058709	11	T AATAGTGTTTAAATAT	T GGAGGTTTTTATCTAA	29.06
NC_070598.1	RVD2	RVD2	18.05	11.02	17601596	17601638	11	T AAATATATTTGCATTT	T CTAAATGTTTAACTAT	29.07
NC_070589.1	RVD2	RVD2	16.14	12.93	28529137	28529178	10	T GTATGAATTTAAATAT	T GAAGGGATTTAACTAA	29.07
NC_070579.1	RVD2	RVD2	16.37	12.7	35818575	35818616	10	T ATAGTTATTTACATAT	T AAAAATGTTTCACTTT	29.07
NC_070588.1	RVD2	RVD2	10.99	18.09	6116570	6116614	13	T GAAAGACTTTAACTAT	T CAAATACATCAACTAT	29.08
NC_070579.1	RVD2	RVD2	17.24	11.84	20972008	20972057	18	T AAATAACTTTAACAAC	T GAAGCTATTTCACCAT	29.08
NC_070592.1	RVD2	RVD2	13.74	15.35	8272089	8272133	13	T GGAAGTGTAAAACCAT	T TGAAATCTTTAAACAT	29.09
NC_070579.1	RVD2	RVD2	17.63	11.46	32454852	32454904	21	T AGTAATGGTGAACTAT	T AAAGATGTTTGAGTAT	29.09
NC_070585.1	RVD2	RVD2	17.24	11.88	34284922	34284971	18	T CAAAAAATTTTACCAA	T GAACCTTTTTAACTAT	29.12
NC_070588.1	RVD2	RVD2	14.05	15.07	7600326	7600381	24	T ACACACATATGACTAT	T ATATACATTTCACTAT	29.12
NC_070592.1	RVD2	RVD2	10.82	18.31	20995350	20995395	14	T TAAAGTCTTTGACTAT	T GATCATGTTAGACAAA	29.13
NC_070592.1	RVD2	RVD2	13.74	15.39	8316151	8316203	21	T GGAAGTGTAAAACCAT	T GAACATTTTTAAATCT	29.13
NC_070585.1	RVD2	RVD2	14.73	14.4	14338415	14338468	22	T GGAAATGTGAGACAAT	T GCCAATATTTCAATAT	29.13
NC_070590.1	RVD2	RVD2	10.17	18.97	23884859	23884907	17	T TAAAATATTTGACTAT	T CACTGTGTTTCATTAC	29.14
NC_070601.1	RVD2	RVD2	14.5	14.66	18442010	18442065	24	T GAACATATTTGACATT	T AAAGATAAATAAATAT	29.16
NC_070600.1	RVD2	RVD2	12.65	16.53	6234598	6234649	20	T GAAAATATTTAAACAT	T ATCAATGTATAAATAT	29.18
NC_070597.1	RVD2	RVD1	19.16	10.03	21300983	21301040	25	T GGCGCTATACAAATAA	T TCCACATCTAAAATCCA	29.19
NC_070588.1	RVD2	RVD1	13.93	15.26	15203959	15204012	21	T GAAGGTTTTTTAATAT	T TCCACTACTTCCCTCCA	29.19
NC_070588.1	RVD2	RVD2	13.97	15.23	9923691	9923747	25	T AAAAGTGCTTTACCAT	T CCAGATATTTCAAAAT	29.2
NC_070601.1	RVD2	RVD2	13.06	16.14	313226	313280	23	T GGAAATATTTCCCTCT	T GCAGGTTCTTATCTAT	29.2
NC_070589.1	RVD2	RVD2	13.88	15.32	4269128	4269173	14	T TGAAATCTTACACTAT	T CAAAGTGCTAAAATAT	29.2
NC_070592.1	RVD2	RVD2	13.82	15.39	26892987	26893037	19	T GCATATATGTGACTAT	T ACAAATAATTAACAAA	29.21
NC_070586.1	RVD2	RVD2	14.81	14.43	4883637	4883693	25	T GGAGATGTTTGCTAAT	T GGACGATTTTGACTAA	29.24
NC_070585.1	RVD2	RVD2	10.17	19.07	27246476	27246524	17	T TAAAATGTTTAACTAT	T AAATGAGTTGCATTAT	29.24
NC_070586.1	RVD2	RVD2	14.01	15.23	33281714	33281760	15	T TAAATTGTTTAACCAT	T TCAAATAATTAACTAA	29.24
NC_070593.1	RVD2	RVD2	14.95	14.3	27014845	27014897	21	T CCACATAGTTCACTAT	T AGATATGTTTAAATAA	29.25
NC_070585.1	RVD2	RVD2	17.17	12.09	30931602	30931658	25	T AAAAGGTTAAAACTAT	T TGAAATGTTTGAATAT	29.26
NC_070592.1	RVD2	RVD2	15.52	13.74	8463993	8464047	23	T AAAAGTACTTCAAAAT	T GGAAGTGTTAAACAAA	29.26
NC_070592.1	RVD2	RVD2	11.37	17.89	9712019	9712065	15	T AAAGGTATTTAATTAT	T AAATAAATTCAGCTAT	29.26
NC_070590.1	RVD2	RVD2	18.68	10.59	2044947	2045001	23	T ACATTTGATTGACAAA	T GGACATGTTTGACTAA	29.27
NC_070596.1	RVD2	RVD2	11.19	18.08	19025073	19025122	18	T AAACATGTATAACTAT	T AAAGCTTTATGATAAT	29.27
NC_070588.1	RVD2	RVD2	14.26	15.02	6943733	6943787	23	T AGAAGTGTTTAAAAAA	T ACAAATATTTGAATTT	29.28
NC_070578.1	RVD2	RVD2	19.33	9.97	6347900	6347949	18	T AAAAGTGATTTCATAG	T AGAGATTTTTAACTAT	29.3
NC_070583.1	RVD2	RVD2	15.17	14.13	31485359	31485415	25	T AGAGAAATGTAACTCT	T GTAAGTATTTGAATCT	29.3
NC_070581.1	RVD2	RVD2	16.67	12.63	6883027	6883081	23	T AGACTCTTTTGACAAT	T GTAGCTGTTAAACTAT	29.3
NC_070586.1	RVD2	RVD2	12.13	17.17	34097930	34097972	11	T AAAAGTGTATAACAAT	T AAAAAATAGTGACTAT	29.3
NC_070593.1	RVD2	RVD2	14.56	14.74	14773569	14773613	13	T GAAAATCTTTTAGTAT	T AACAATGTTTCACTTT	29.3
NC_070584.1	RVD2	RVD1	13.97	15.35	23160949	23161002	21	T GGAAATGGTTGATTAT	T TCCGCTTCTGTGTTCAC	29.32
NC_070589.1	RVD2	RVD2	11.24	18.08	11943774	11943828	23	T GAAGATGTTTGACTGT	T GTAACTAATTGATTAA	29.32
NC_070589.1	RVD2	RVD2	9.18	20.15	29225556	29225597	10	T ACAAATATTTGACTAT	T ATAGATGTATCAACAG	29.33
NC_070595.1	RVD2	RVD2	12.49	16.84	23336839	23336888	18	T AAATGTATTTAAATAT	T GAAAATATGTATCTAC	29.33
NC_070583.1	RVD2	RVD2	9.84	19.49	12844791	12844834	12	T ACAGATGTTTCACTAT	T GAAAATACTGGCATAA	29.33
NC_070597.1	RVD2	RVD2	14.87	14.47	25472537	25472590	22	T GAAATTCTCTGACTCT	T TAAAATCTTTAATTAT	29.34
NC_070584.1	RVD2	RVD2	15.85	13.5	28464040	28464091	20	T AAAAATACTGAAATAT	T GTAAATATTTGAGTAT	29.35
NC_070579.1	RVD1	RVD2	13.29	16.06	39248555	39248597	10	T TCCCCTTCTCTCATCCT	T GGAAATGCATGAACAT	29.35
NC_070590.1	RVD2	RVD2	16.33	13.03	20228860	20228902	11	T GACAATGTTTGAATCC	T CAAGATGTTAAACTCT	29.36
NC_070578.1	RVD2	RVD2	14.68	14.68	18297727	18297780	22	T TCACAGGTTTGACTAT	T CAATCTGTTTGACTAG	29.36
NC_070595.1	RVD2	RVD2	14.17	15.19	22945653	22945697	13	T AAAAGTAATTGCCTAC	T GCAAACATACAACTAT	29.36
NC_070589.1	RVD2	RVD2	13.97	15.39	5039407	5039453	15	T TAAGAAATTTGACTAA	T AAAAAACTAAAACTAT	29.36
NC_070591.1	RVD2	RVD2	12.83	16.54	11176741	11176797	25	T TCAAGTGTTTAACCAT	T TGAAATCTTAAACTGT	29.37
NC_070584.1	RVD2	RVD2	8.13	21.24	7364480	7364528	17	T AAAGATGTTTAACTAT	T ATACATGTAATCATAT	29.37
NC_070600.1	RVD2	RVD2	11.71	17.66	12413923	12413972	18	T ACAAATATTTAAATAT	T TCATGGGTTTAACTAA	29.37
NC_070588.1	RVD2	RVD2	16.54	12.83	25525102	25525154	21	T ACAGAATTTTAACTGT	T GTACATGTCTAACTAT	29.37
NC_070579.1	RVD2	RVD2	15.23	14.14	17205117	17205168	20	T ACAACTCTTTGAATAC	T AAAGAAGTTAAACCAT	29.37
NC_070585.1	RVD2	RVD2	16.7	12.69	34471966	34472016	19	T ATAAATAAATAAATAT	T AAATATATTTAAATAT	29.39
NC_070596.1	RVD2	RVD2	13.86	15.53	25411624	25411676	21	T AAAAGTATATAAGTAT	T GCAGTACTTTTACTAT	29.39
NC_070582.1	RVD2	RVD2	15.69	13.71	11260824	11260869	14	T TGAAACATTTATCTAT	T AAACATATTTAAAAAT	29.4
NC_070587.1	RVD2	RVD2	15.52	13.88	24933827	24933870	12	T AAAAATGTCCCAATAT	T CGCCATGTTTAACCAT	29.4
NC_070583.1	RVD2	RVD2	18.58	10.82	7016175	7016222	16	T AAAACTACTCCAATAA	T AGACTTATTTGACTAT	29.4
NC_070581.1	RVD2	RVD2	14.94	14.46	26099269	26099316	16	T CAACCTTTTTAACTAA	T AAAAGTGATCAAATAT	29.4
NC_070601.1	RVD2	RVD2	14.7	14.7	104667	104718	20	T ATAAATATATAAATAT	T ATAAATATATAAATAT	29.4
NC_070587.1	RVD2	RVD2	14.01	15.39	7497199	7497240	10	T TGAATTATTAAACTAT	T CAATATATTTGCATAT	29.4
NC_070591.1	RVD2	RVD2	10.79	18.62	15444399	15444450	20	T GCAGATATTTGACAAT	T AAAAAAATCTACCTCA	29.41
NC_070589.1	RVD2	RVD2	12.37	17.04	11090772	11090825	22	T TAAAATATTTAACTAA	T TAAAATGACTCACAAT	29.41
NC_070597.1	RVD2	RVD2	12.13	17.29	18604972	18605017	14	T AAAAGTATTTGACCAA	T GGATGCACTTAACTGT	29.42
NC_070585.1	RVD2	RVD2	13.68	15.74	23435361	23435414	22	T AACAGTGTTTAACTGT	T GGATTTGATTGAATAT	29.42
NC_070584.1	RVD1	RVD2	13.08	16.34	10607222	10607271	17	T CCCACTTCCATAGTCTA	T TTAAATGTATAAATAT	29.42
NC_070578.1	RVD2	RVD2	17.55	11.88	1652294	1652344	19	T AACAGTATCACAATAT	T CCATATATTTGACTAT	29.43
NC_070592.1	RVD2	RVD2	13.74	15.69	8272089	8272141	21	T GGAAGTGTAAAACCAT	T GAAAATATTGAAATCT	29.43
NC_070579.1	RVD2	RVD2	17.75	11.68	14637423	14637479	25	T GAAACTGATTAATTGT	T GGACATTTTTCACTAT	29.43
NC_070592.1	RVD2	RVD2	13.74	15.69	8277790	8277842	21	T GGAAGTGTAAAACCAT	T GAAAATATTGAAATCT	29.43
NC_070578.1	RVD2	RVD2	16.31	13.15	24325752	24325805	22	T GCAAATGTCTGGCAAT	T GGAAATGTTTCAATCT	29.46
NC_070579.1	RVD2	RVD2	9.73	19.73	10532243	10532293	19	T GGAAGTGTTTAACTAA	T GACAACATTTGGCTCC	29.46
NC_070590.1	RVD2	RVD2	10.99	18.47	26517948	26517991	12	T GAAAATCTTTGACAAT	T GTAACTGTTTGAATTC	29.46
NC_070583.1	RVD1	RVD2	14.39	15.07	18760417	18760467	18	T TCCCCCTCTATCATAAA	T CAAGATATCTGCCTCT	29.46
NC_070589.1	RVD2	RVD2	15.09	14.37	7734567	7734608	10	T GGAAGTGTTTACAGAT	T CAACATGTTCAAATAT	29.46
NC_070599.1	RVD2	RVD2	15.81	13.65	6674840	6674894	23	T GAGGGTCTTTAACTTT	T AAAGATATTTAAAGAT	29.46
NC_070596.1	RVD2	RVD2	18.23	11.24	25234389	25234439	19	T AGCAAAATGTCACAAT	T GGAAATGTTTGTCTAT	29.47
NC_070579.1	RVD1	RVD2	12.39	17.09	36650997	36651045	16	T TCAACTTCTCAAATCCA	T GGAGATTATTGGCTAA	29.48
NC_070597.1	RVD2	RVD2	17.45	12.04	22381117	22381162	14	T AGAGAAATTTAAAGAA	T AAACATCTTTGACAAT	29.49
NC_070582.1	RVD2	RVD2	20.31	9.18	3597942	3597990	17	T GAAAATGAAATAATAA	T GAAACTATTTAACTAT	29.49
NC_070592.1	RVD2	RVD2	15.85	13.64	19042456	19042502	15	T GGAACTCATTAACAAA	T GATAGTATTAAACTAT	29.49
NC_070580.1	RVD2	RVD2	19.32	10.17	1250498	1250547	18	T GAAAATGAAACAATAA	T AAAAATGTTTTACTAT	29.49
NC_070581.1	RVD2	RVD2	15.22	14.27	21623160	21623209	18	T GAAAAAGTTTTATTAT	T ACAGATATTTGCTTAT	29.49
NC_070579.1	RVD2	RVD2	17.28	12.21	37508346	37508390	13	T GAAAATGTTTGGATTT	T AACTGTATTTAACTAT	29.49
NC_070583.1	RVD2	RVD2	17.66	11.84	10460197	10460242	14	T GCCATTGTATGACTAG	T CAAAGTCTCTGACTAT	29.5
NC_070593.1	RVD2	RVD2	18.39	11.11	14310427	14310478	20	T AAAAAAAGCTCACAAT	T GAAGCTATTTGAATAT	29.5
NC_070589.1	RVD2	RVD2	16.25	13.25	8387619	8387674	24	T ACACAAATATAACTAA	T GGAAATATGTGAATAT	29.5
NC_070587.1	RVD2	RVD2	13.77	15.76	27653851	27653905	23	T GGAGGTATTCAACTCA	T ACACCTGTTACACAAT	29.53
NC_070586.1	RVD2	RVD1	15.29	14.24	17915175	17915219	12	T TGTGATGATTAACTAT	T TCCACATCTCTGCTCCG	29.53
NC_070601.1	RVD2	RVD2	15.56	13.97	8009778	8009819	10	T AAAACTGTTTCACTGC	T ATAGAAGTTTAACCAT	29.53
NC_070579.1	RVD2	RVD2	16.67	12.86	24251438	24251483	14	T TAACTCGTATGACTAT	T AAATGTGTTTCACTCT	29.53
NC_070601.1	RVD2	RVD2	13.97	15.56	2519614	2519657	12	T ATAGAAGTTTAACCAT	T AAAACTGTTTCACTGC	29.53
NC_070582.1	RVD2	RVD2	15.87	13.68	18031573	18031627	23	T GTACATGTATGATTAT	T ACAGCTGTATTACTAT	29.55
NC_070588.1	RVD2	RVD2	18.96	10.59	23789132	23789173	10	T GAATCAGTTTGAAAAA	T GGACATGTTTGACAAT	29.55
NC_070593.1	RVD2	RVD2	12.32	17.23	27768007	27768053	15	T GGAGATATTTCAGTAT	T GGAAATGTTGGTCGAT	29.55
NC_070582.1	RVD2	RVD2	11.77	17.78	13068895	13068942	16	T AGATGAGTTTAACTAT	T GGAAGCTTCAAACTAC	29.55
NC_070596.1	RVD2	RVD2	14.54	15.02	7178189	7178240	20	T GTAAATATTTCACTTT	T CAAAATATTTGAATGT	29.56
NC_070586.1	RVD2	RVD2	13.39	16.17	9086340	9086390	19	T CAAAATACTTAACTAA	T GAAGATATTTGATGAA	29.56
NC_070585.1	RVD2	RVD2	11.31	18.25	21462048	21462097	18	T GCAAATATTTGAATAT	T AAAATTAATTTCCCAT	29.56
NC_070596.1	RVD2	RVD2	13.1	16.47	24827334	24827379	14	T CAAACTCTTTAACTAC	T AACAGTATTTCATTAA	29.57
NC_070592.1	RVD2	RVD2	11.88	17.69	16636454	16636510	25	T TGACATCTTTAACTAT	T GAAGATACATACCTTT	29.57
NC_070589.1	RVD2	RVD2	12.73	16.84	4467022	4467071	18	T GAAGGTAGCTGACTAT	T AAAGTTCACTGACTAA	29.57
NC_070590.1	RVD2	RVD2	14.5	15.07	3019635	3019684	18	T ATAGATAATTAAATAT	T ATATCTATATAACTAT	29.57
NC_070581.1	RVD2	RVD2	17.65	11.93	18474880	18474931	20	T AAATGTGTTTGCATTT	T AGAAATGTTAGACAAT	29.58
NC_070579.1	RVD2	RVD2	18.39	11.19	2600886	2600927	10	T AAACAAATAAAACTAG	T AAAACTGTTTAACTAA	29.58
NC_070582.1	RVD2	RVD2	15.65	13.94	26026453	26026503	19	T AAAAATATTTGAAGAC	T GGTTGTGTTTCACTAT	29.59
NC_070578.1	RVD2	RVD2	18.4	11.19	28704428	28704478	19	T ACATGCATTTTAGTAT	T AAAACAATTTGACTAT	29.59
NC_070594.1	RVD2	RVD2	15.09	14.5	19086441	19086490	18	T GTAAGTGTGTAAATAT	T AAACATGTTTGACTGC	29.59
NC_070593.1	RVD2	RVD2	13.03	16.57	14741917	14741963	15	T TCAAATGTTTAACCAT	T CCAAATACTTAAAAAT	29.6
NC_070579.1	RVD2	RVD2	14.9	14.7	27450055	27450101	15	T CAAACTGTTACACTAC	T TAAAATAATTAAATAT	29.6
NC_070601.1	RVD2	RVD2	13.51	16.09	8287695	8287745	19	T GAAAAACTTTAAATAT	T AACCATGACTCACTAT	29.6
NC_070580.1	RVD1	RVD2	15.4	14.21	2896181	2896227	14	T TCCACCAATATAGTTCA	T TCAAATGTTTCAATAT	29.61
NC_070579.1	RVD2	RVD1	16.41	13.2	33360664	33360718	22	T AAAAATACTTTACTCA	T TCTGCTTAAATGATCCA	29.61
NC_070582.1	RVD2	RVD2	12.25	17.36	35099964	35100017	22	T AAAAGTGTTTGAACAT	T ACAGCTGTACAGCTAT	29.61
NC_070579.1	RVD2	RVD2	17.36	12.25	38846725	38846778	22	T ACAGCTGTACAGCTAT	T AAAAGTGTTTGAACAT	29.61
NC_070599.1	RVD2	RVD2	14.95	14.66	18896473	18896518	14	T GGAACTGTTTTAATAC	T AAAAGCATTTAAATAA	29.61
NC_070591.1	RVD2	RVD2	17.03	12.59	9553237	9553287	19	T GAAAAACTTTAAATGT	T GGAGATCTTTGACCAC	29.62
NC_070586.1	RVD2	RVD2	12.59	17.03	10841613	10841663	19	T GGAGATCTTTGACCAC	T GAAAAACTTTAAATGT	29.62
NC_070589.1	RVD2	RVD2	14.01	15.62	21467542	21467592	19	T TAAATTAATTGACTAT	T GCATGGAATTGACTAT	29.63
NC_070590.1	RVD2	RVD2	15.76	13.88	5959479	5959527	17	T AAAAATCTTTCTCTAA	T AGATCTATTTCACAAT	29.64
NC_070586.1	RVD2	RVD2	17.86	11.78	10071647	10071697	19	T TGAATATTTTAACAAT	T AGAGATGGTTCACTAT	29.64
NC_070601.1	RVD2	RVD2	19.81	9.84	2644091	2644146	24	T AAATGTATTTGGAAAC	T ACAGCTATTTGACTAT	29.65
NC_070585.1	RVD2	RVD2	16.33	13.33	21667509	21667551	11	T GTAAATAATTGAATCT	T GAAAATATTGAACAAT	29.66
NC_070580.1	RVD1	RVD2	15.2	14.47	15838267	15838315	16	T TCTGCTTAAAAGATCCA	T GGACGTTTTTGACACT	29.67
NC_070601.1	RVD2	RVD1	15.42	14.26	5010940	5010983	11	T GCATGTGTGAGACTAT	T TCCACTCTTATGCTACA	29.68
NC_070597.1	RVD2	RVD1	14.08	15.6	7135939	7135995	24	T ACACATTTTTAACAAT	T TTCACTACAATAATACA	29.68
NC_070589.1	RVD2	RVD2	11.84	17.85	28891755	28891798	12	T GAAGCTATTTCACAAT	T GTAGTTGGTTAATTAT	29.69
NC_070595.1	RVD2	RVD2	15.19	14.5	5147715	5147758	12	T AGAAAACCTTAACAAT	T GTAAATATCTAAATAT	29.69
NC_070587.1	RVD2	RVD2	16.14	13.55	29812459	29812509	19	T AGACAGTTTTGAATAT	T GAAACTCTTTAGCTAT	29.69
NC_070591.1	RVD2	RVD2	15.85	13.84	6673241	6673292	20	T TTAGGTATTTAACCCT	T AAAAATACTTGACTGT	29.69
NC_070586.1	RVD2	RVD2	14.86	14.83	28436883	28436926	12	T AAAAGTATGTAAGTAT	T GTAAGACTTTAACTAC	29.69
NC_070579.1	RVD2	RVD2	18.12	11.57	20681610	20681664	23	T GGATTTGGTTAACTTT	T GGAAGTGTTTTACAAT	29.69
NC_070585.1	RVD2	RVD2	14.21	15.49	31147704	31147745	10	T AAATATTTTTAACTAA	T GTAAATATTTGACTGA	29.7
NC_070601.1	RVD2	RVD2	15	14.7	2434324	2434379	24	T AGAAGGATTTGCCTCT	T ATAAATATATAAATAT	29.7
NC_070592.1	RVD2	RVD2	15.53	14.18	26923209	26923265	25	T GCAGTACTTTTACTAT	T AAAAGTACTGCACTAT	29.71
NC_070584.1	RVD1	RVD2	16.08	13.63	2505526	2505573	15	T AACACCTCCATCCTCCA	T GGAGGTGTTACATTAT	29.71
NC_070587.1	RVD2	RVD2	15.53	14.18	35083023	35083078	24	T GCAGTACTTTTACTAT	T AAAAGTACTGCACTAT	29.71
NC_070587.1	RVD2	RVD2	15.53	14.18	35083316	35083371	24	T GCAGTACTTTTACTAT	T AAAAGTACTGCACTAT	29.71
NC_070587.1	RVD2	RVD2	15.53	14.18	35082731	35082786	24	T GCAGTACTTTTACTAT	T AAAAGTACTGCACTAT	29.71
NC_070584.1	RVD1	RVD2	16.08	13.63	2507283	2507330	15	T AACACCTCCATCCTCCA	T GGAGGTGTTACATTAT	29.71
NC_070584.1	RVD1	RVD2	15.88	13.83	2506900	2506947	15	T AACGCCTCCATCCTCCA	T GGAGATGTTACATTAT	29.71
NC_070578.1	RVD2	RVD1	13.63	16.08	532763	532810	15	T GGAGGTGTTACATTAT	T AACACCTCCATCCTCCA	29.71
NC_070584.1	RVD1	RVD2	16.08	13.63	2506783	2506830	15	T AACACCTCCATCCTCCA	T GGAGGTGTTACATTAT	29.71
NC_070584.1	RVD1	RVD2	15.88	13.83	2506705	2506752	15	T AACGCCTCCATCCTCCA	T GGAGATGTTACATTAT	29.71
NC_070578.1	RVD2	RVD1	13.63	16.08	532919	532966	15	T GGAGGTGTTACATTAT	T AACACCTCCATCCTCCA	29.71
NC_070587.1	RVD2	RVD2	15.53	14.18	35082438	35082493	24	T GCAGTACTTTTACTAT	T AAAAGTACTGCACTAT	29.71
NC_070578.1	RVD2	RVD1	13.63	16.08	532958	533005	15	T GGAGGTGTTACATTAT	T AACACCTCCATCCTCCA	29.71
NC_070578.1	RVD2	RVD1	13.63	16.08	532997	533044	15	T GGAGGTGTTACATTAT	T AACACCTCCATCCTCCA	29.71
NC_070584.1	RVD1	RVD2	15.88	13.83	2507095	2507142	15	T AACGCCTCCATCCTCCA	T GGAGATGTTACATTAT	29.71
NC_070578.1	RVD2	RVD1	13.63	16.08	533426	533473	15	T GGAGGTGTTACATTAT	T AACACCTCCATCCTCCA	29.71
NC_070584.1	RVD1	RVD2	15.88	13.83	2506510	2506557	15	T AACGCCTCCATCCTCCA	T GGAGATGTTACATTAT	29.71
NC_070584.1	RVD2	RVD1	13.63	16.08	2177020	2177067	15	T GGAGGTGTTACATTAT	T AACACCTCCATCCTCCA	29.71
NC_070584.1	RVD1	RVD2	16.08	13.63	2506393	2506440	15	T AACACCTCCATCCTCCA	T GGAGGTGTTACATTAT	29.71
NC_070584.1	RVD1	RVD2	16.08	13.63	2506354	2506401	15	T AACACCTCCATCCTCCA	T GGAGGTGTTACATTAT	29.71
NC_070584.1	RVD1	RVD2	16.08	13.63	2506315	2506362	15	T AACACCTCCATCCTCCA	T GGAGGTGTTACATTAT	29.71
NC_070584.1	RVD1	RVD2	16.08	13.63	2506276	2506323	15	T AACACCTCCATCCTCCA	T GGAGGTGTTACATTAT	29.71
NC_070578.1	RVD2	RVD1	13.63	16.08	533465	533512	15	T GGAGGTGTTACATTAT	T AACACCTCCATCCTCCA	29.71
NC_070587.1	RVD1	RVD2	11.21	18.5	33515571	33515625	22	T ACCACTTCTATACTACA	T AGAAGTATAGTAGTAT	29.71
NC_070584.1	RVD2	RVD2	18.73	10.99	12851269	12851313	13	T GAACACAAATAAGTAT	T GGACATATTAAACTAT	29.72
NC_070592.1	RVD2	RVD2	17.02	12.7	16242880	16242936	25	T TGAAATATTTGAGTTT	T GGACCTCTTAAACTAT	29.72
NC_070585.1	RVD2	RVD2	17.79	11.93	18232309	18232358	18	T CAAACTCTTTCTATAT	T AGAAATGTATGACTAA	29.72
NC_070600.1	RVD2	RVD2	15.67	14.05	18319795	18319838	12	T AAAAGTACATGAGTAT	T GCAAAACTTTAACTAC	29.72
NC_070584.1	RVD2	RVD2	16.01	13.72	14734397	14734452	24	T GAAAATGTTCTACTCC	T TAACTTGTTTCACTAT	29.73
NC_070578.1	RVD2	RVD2	11.22	18.51	24180030	24180072	11	T AAATATATTTCACTAT	T AAAGCAATATGGCCAT	29.73
NC_070594.1	RVD2	RVD2	14.63	15.1	18533542	18533588	15	T GCATGTATTTGACAAA	T GGCAGTGTTTGAGCAT	29.73
NC_070578.1	RVD2	RVD2	16.02	13.71	19879629	19879677	17	T ATATATATATGACAAT	T CAAAATATATAAATAT	29.73
NC_070591.1	RVD2	RVD2	13.02	16.71	28637452	28637496	13	T GCACCTATTTGAATAT	T GGAATCTTTTCCCTAT	29.73
NC_070599.1	RVD2	RVD2	14.05	15.69	13804112	13804165	22	T CAAAGTACATCACTAT	T TAAAATGTATAACTGT	29.74
NC_070596.1	RVD2	RVD2	13.44	16.3	15229257	15229301	13	T GGAAAAATTTGACTGT	T AGAGAAAATTGAATCT	29.74
NC_070599.1	RVD2	RVD2	14.05	15.69	13809318	13809371	22	T CAAAGTACATCACTAT	T TAAAATGTATAACTGT	29.74
NC_070588.1	RVD2	RVD2	12.01	17.73	6028166	6028208	11	T TAAGATATTTGACTCT	T CAAGTTTTTCCACAAT	29.74
NC_070584.1	RVD2	RVD2	12.43	17.32	23235479	23235528	18	T TCAGGTGTTTGACAAT	T AAAGGTCTACAAATAC	29.75
NC_070591.1	RVD2	RVD2	14.43	15.32	2462675	2462725	19	T AAAAATGTTTCATAAT	T AAAAGTGAATCAATAT	29.75
NC_070584.1	RVD2	RVD2	14.23	15.52	31931305	31931346	10	T GAAAGTCTTTAATTAC	T ACAAATGTTTAAAAAA	29.75
NC_070597.1	RVD2	RVD2	15.54	14.21	25771055	25771097	11	T CATGGTGTTTAATTAT	T AACTGTATATAACTAT	29.75
NC_070601.1	RVD2	RVD2	15.1	14.66	10654512	10654566	23	T ACAAATCTTTCACAAA	T AAAGATATATAAATAA	29.76
NC_070592.1	RVD2	RVD2	15.75	14.01	2325625	2325673	17	T AAAACTATTTACACAT	T ATAGTTATTTAACTAA	29.76
NC_070583.1	RVD2	RVD2	18.01	11.77	24765362	24765409	16	T TAAAATGTATAGATAT	T AAAGTTGTTTGACAAT	29.78
NC_070599.1	RVD2	RVD2	17.42	12.36	19682492	19682534	11	T AAAGATGATTAATTCA	T AAAGCTCTTTAAATAT	29.78
NC_070592.1	RVD2	RVD2	19.53	10.25	22770710	22770755	14	T GCAGCTGTCTCTCTGT	T AAAAGTGTTTGAATAT	29.78
NC_070592.1	RVD2	RVD2	10.25	19.53	22733350	22733395	14	T AAAAGTGTTTGAATAT	T GCAGCTGTCTCTCTGT	29.78
NC_070588.1	RVD2	RVD2	13.48	16.31	28280274	28280320	15	T TGAGATATTTAACTTT	T GAACGTGTTCATCAAT	29.79
NC_070591.1	RVD2	RVD2	13.82	15.97	19901907	19901955	17	T GAAACGTTTTGACTAT	T GAAAATGATTAAATGT	29.79
NC_070580.1	RVD2	RVD2	19.2	10.59	15622486	15622532	15	T GACAGTGTTGAATTAG	T GGAAGTGTTACACTAT	29.79
NC_070582.1	RVD2	RVD2	15.85	13.94	14224541	14224585	13	T ATATTTGTTAAACTAT	T GGAAAAGTTTAACAAA	29.79
NC_070587.1	RVD2	RVD2	21.26	8.53	6344106	6344161	24	T ATATATATATATGTAT	T AAAAATATTTAACTAT	29.79
NC_070581.1	RVD2	RVD2	10.33	19.46	18327458	18327506	17	T AGAAATATTTAACTAA	T AACAGTGATTACTTAA	29.79
NC_070581.1	RVD2	RVD2	15.29	14.5	29153545	29153590	14	T GAAGCTGTTTAACTTG	T CGAGATATTTAGCTAC	29.79
NC_070595.1	RVD2	RVD2	12.66	17.14	23652490	23652544	23	T AGATGTTTTTCACTAT	T GCAGTTGTGTAACTTT	29.8
NC_070581.1	RVD1	RVD2	8.06	21.74	27028901	27028955	22	T TCCACTTCTATAATCCC	T ACTTATCTTTCATTCT	29.8
NC_070589.1	RVD2	RVD2	14.3	15.52	19986319	19986373	23	T GAAAGTGTTACACTGT	T CAAAATGTTAAAAAAT	29.82
NC_070593.1	RVD2	RVD2	14.46	15.36	2622616	2622657	10	T AGAAATGTAAAAATAT	T GCAAGACTTTAACTTT	29.82
NC_070578.1	RVD2	RVD2	11.97	17.86	10696162	10696204	11	T GGAAATATTTGCCTAC	T CAATGTGTGAACCTAT	29.83
NC_070581.1	RVD2	RVD1	20.12	9.71	22842146	22842202	24	T AGAGCAGATTAAAGAA	T TCCTCTTCTCTGATCCA	29.83
NC_070584.1	RVD2	RVD2	14.57	15.27	2619680	2619721	10	T ACACATATATAAATAT	T ACCTATATATAACTAT	29.84
NC_070583.1	RVD2	RVD2	15.05	14.79	18536413	18536454	10	T GAAAGTGTGTGAAAAT	T GGAGCAATTTAACAAA	29.84
NC_070598.1	RVD2	RVD2	16.24	13.61	16316758	16316808	19	T CAAAGTGTTAAATCAT	T TGAAGTGTTAGACTCT	29.85
NC_070598.1	RVD2	RVD2	16.86	12.99	8982648	8982695	16	T AAAAACATTAAAAAAT	T GGAAATACTTCACAAT	29.85
NC_070595.1	RVD2	RVD2	16.08	13.78	5583951	5583995	13	T CAACCAGTTTCAATAT	T GAAACTGGTTGACTAA	29.86
NC_070592.1	RVD2	RVD2	11.84	18.02	25609129	25609178	18	T GAACACGTTTCACTAT	T AAAAGTTAATGACTCA	29.86
NC_070580.1	RVD2	RVD2	12.01	17.85	263413	263457	13	T GACGTTATTTAACTAT	T TAAAGTTTTTAAATGT	29.86
NC_070584.1	RVD2	RVD2	12.65	17.21	25625381	25625431	19	T AAAAATGTTTAAAAAT	T AAAATAGTTGAACTCT	29.86
NC_070595.1	RVD2	RVD2	16.08	13.78	5584019	5584063	13	T CAACCAGTTTCAATAT	T GAAACTGGTTGACTAA	29.86
NC_070595.1	RVD2	RVD2	16.08	13.78	5583985	5584029	13	T CAACCAGTTTCAATAT	T GAAACTGGTTGACTAA	29.86
NC_070595.1	RVD2	RVD2	16.08	13.78	5584087	5584131	13	T CAACCAGTTTCAATAT	T GAAACTGGTTGACTAA	29.86
NC_070590.1	RVD2	RVD2	12.9	16.96	24589057	24589106	18	T CCACATGTTAAACTAT	T GGTAATGTTCAGCTAT	29.86
NC_070595.1	RVD2	RVD2	16.08	13.78	5584053	5584097	13	T CAACCAGTTTCAATAT	T GAAACTGGTTGACTAA	29.86
NC_070599.1	RVD2	RVD2	19.08	10.79	3470561	3470615	23	T ACATTTATTAAACAAA	T GCAAATGTTTGACTAA	29.87
NC_070579.1	RVD2	RVD2	17.24	12.63	21008994	21009043	18	T AAATAACTTTAACAAC	T GAAGCTGTTTTACCAT	29.87
NC_070582.1	RVD2	RVD2	16.26	13.61	28260584	28260631	16	T AGAGATGATTAAAAAA	T TGAGTTGTTAAACTAT	29.87
NC_070595.1	RVD2	RVD2	17.03	12.85	15484719	15484769	19	T GATAATAATTCAATAT	T AAAAATATTTAAAAAT	29.88
NC_070589.1	RVD2	RVD2	18.89	10.99	11678120	11678172	21	T ACAGATTAATCACTAG	T GAAAATGCTTCACTAT	29.88
NC_070586.1	RVD2	RVD2	17.39	12.49	18738467	18738515	17	T ATAAATCTTTGAATCA	T TAAGATATTTAAATAT	29.88
NC_070586.1	RVD2	RVD2	16.9	12.99	38338514	38338565	20	T AAAAATACATACATAT	T ACAAGTGCTAAACTAT	29.89
NC_070591.1	RVD2	RVD2	12.16	17.73	21100323	21100368	14	T AAAGCTGTTTCAATAT	T TCAGATTCTTCACAAT	29.89
NC_070587.1	RVD2	RVD2	11.64	18.25	570850	570897	16	T GAACGTCTTTGACAAT	T ATCAATAATTTACAAT	29.89
NC_070587.1	RVD2	RVD2	14.95	14.95	26845257	26845300	12	T GTAAGTGTTTCAAAAT	T GAATGTCATTGAATAT	29.9
NC_070593.1	RVD2	RVD2	13.85	16.05	14567631	14567687	25	T GAACCAGTTTAACAAT	T GTAACTTTTTCAATAT	29.9
NC_070598.1	RVD2	RVD2	16.91	12.99	7729168	7729210	11	T ATATTTCTATAACTAT	T ACAAAAGTCTGACTAT	29.9
NC_070601.1	RVD2	RVD2	14.74	15.16	8005169	8005221	21	T AATACTATTTGCCTAT	T GGACATGTTTCACTGA	29.9
NC_070589.1	RVD2	RVD2	10.13	19.77	10160401	10160444	12	T GAAAATATCTGACTAT	T CCAAGTCAATCACAAC	29.9
NC_070580.1	RVD2	RVD2	16.87	13.03	39130011	39130061	19	T TTAACAGTTTAACAAT	T TAAACTGTTAAACTAT	29.9
NC_070594.1	RVD2	RVD2	13.94	15.97	16507738	16507791	22	T GGACTTGTTTGTCTAT	T GCAGATGTTACAACAT	29.91
NC_070594.1	RVD2	RVD2	11.9	18.01	3246274	3246329	24	T GCAGGTGTTTGACTTT	T TAAAATGATTAAATGT	29.91
NC_070597.1	RVD2	RVD2	16.54	13.37	15358421	15358472	20	T GTAAATAATTCACTGT	T GAAGATATTTAATAAT	29.91
NC_070583.1	RVD2	RVD2	17.98	11.93	13334120	13334175	24	T GGAAGTATTCGATGAA	T GGAAATATCAGACTAT	29.91
NC_070599.1	RVD2	RVD2	13.82	16.09	23483279	23483327	17	T ACAGATGTGTTACTAT	T ACACACATATTACTAT	29.91
NC_070600.1	RVD2	RVD2	10.82	19.1	157472	157525	22	T GAAAGTGTTTCCCTAT	T TTAATTGTATAATTAT	29.92
NC_070595.1	RVD2	RVD1	19.73	10.19	10654464	10654507	11	T AATAATTTAATACTAT	T TCCACTTCTATTATACA	29.92
NC_070580.1	RVD2	RVD2	11.93	17.99	35217881	35217928	16	T AGAGATGTTAAACTAA	T GCAAAAATAGGACAAT	29.92
NC_070600.1	RVD2	RVD2	15.22	14.7	20381377	20381420	12	T AAAAATCTTTAAATGT	T AAAGCTATTAAACTGT	29.92
NC_070580.1	RVD2	RVD2	12.13	17.8	12231017	12231070	22	T AGAAATGATTAACAAT	T AAAGTTTTTGGACTAG	29.93
NC_070595.1	RVD2	RVD2	12.18	17.75	21247090	21247136	15	T GAAAATATTGCACTAT	T GGACATATTTAGTCAT	29.93
NC_070595.1	RVD2	RVD2	12.18	17.75	21239550	21239596	15	T GAAAATATTGCACTAT	T GGACATATTTAGTCAT	29.93
NC_070595.1	RVD2	RVD2	12.18	17.75	21243329	21243375	15	T GAAAATATTGCACTAT	T GGACATATTTAGTCAT	29.93
NC_070595.1	RVD2	RVD2	12.18	17.75	21235782	21235828	15	T GAAAATATTGCACTAT	T GGACATATTTAGTCAT	29.93
NC_070579.1	RVD2	RVD2	15.97	13.97	22714080	22714132	21	T TAATGTGTTTTAATAT	T GAAAATGTTTAAATGT	29.94
NC_070579.1	RVD2	RVD2	13.64	16.3	4701077	4701126	18	T GAAAAAATTTGACTGT	T TGAGAAAATTAAATAT	29.94
NC_070578.1	RVD2	RVD2	14.33	15.61	30522156	30522210	23	T TTAGATATTTAAATAT	T GAAAGTTTTTGGATAT	29.94
NC_070586.1	RVD2	RVD2	18.01	11.93	4377133	4377188	24	T ATAAATGTTTAAATTA	T AAAGGTAATTGACCAT	29.94
NC_070595.1	RVD2	RVD2	16.3	13.64	25956866	25956912	15	T TGAGAAAATTAAATAT	T GAAAAAATTTGACTGT	29.94
NC_070584.1	RVD2	RVD2	14.01	15.94	20282981	20283037	25	T GACATTGATTAACTAT	T GAAGTTGTTATAATAT	29.95
NC_070580.1	RVD2	RVD2	14.5	15.45	30803535	30803585	19	T GAAAGACTTTAACTGT	T GAAGATACTTGACTTC	29.95
NC_070593.1	RVD2	RVD2	20.97	8.98	7584915	7584957	11	T TTAAGGGATTTAATAT	T GAACATATTTGACTAT	29.95
NC_070587.1	RVD2	RVD2	16.46	13.51	22763937	22763990	22	T AAAGGCACATAAATAT	T AAAAGTATTACAATAT	29.97
NC_070580.1	RVD2	RVD2	16.74	13.23	9404896	9404950	23	T AAGATTATTTCACAAT	T AAATATATTTCACAAT	29.97
NC_070581.1	RVD2	RVD2	11.93	18.04	12318587	12318631	13	T GAAAGTACTTGACTAA	T GAACATGATTGATAAC	29.97
NC_070579.1	RVD2	RVD2	19.18	10.79	17895874	17895922	17	T TAAAAAGTGTAACAAA	T AGAGCTATCTGACTAT	29.97
NC_070596.1	RVD2	RVD2	13.06	16.91	19285893	19285944	20	T AACAGTTTTTCACTAT	T AATCACATTTAACAAT	29.97
NC_070599.1	RVD2	RVD2	10.24	19.73	27937262	27937309	16	T CAACATATTTAACTAT	T GAAGTTTCTTTCCTCT	29.97
NC_070581.1	RVD2	RVD2	11.93	18.05	12318587	12318641	23	T GAAAGTACTTGACTAA	T AGAGAGGGTTGAACAT	29.98
NC_070578.1	RVD2	RVD2	12.25	17.73	5793678	5793723	14	T AAAAGTGTTTGAACAT	T ACAGCTGTTTCTCTGT	29.98
NC_070578.1	RVD2	RVD2	13.97	16.02	37977350	37977392	11	T AAATGAGTTTAACTAC	T ATAAGCTTTAAACTAT	29.99
NC_070597.1	RVD2	RVD2	16.25	13.74	13679820	13679872	21	T AAAACCCTTAAACCAT	T GGAAATGTCAGACTAC	29.99
NC_070579.1	RVD2	RVD2	17.66	12.33	32443573	32443619	15	T TAATTAGTTTGACTAA	T AAAAAAATTTGACTAA	29.99
NC_070585.1	RVD2	RVD2	21.66	8.33	6953674	6953724	19	T GCAGTTATTTAGAGAA	T AAAGATATTTAACTAT	29.99
NC_070598.1	RVD2	RVD1	15.82	14.17	20933974	20934018	12	T GACAGTCTTGGACCAT	T TCCACCTCTATACTTCC	29.99
NC_070582.1	RVD2	RVD2	19.37	10.62	31206210	31206262	21	T AAAGAGAAATAACCCT	T GGAGATGTTTCACTCT	29.99
NC_070585.1	RVD2	RVD2	14.14	15.86	25416593	25416634	10	T GAAAACAATTGACAAT	T GAAGATGTGTCCCTCT	30
NC_070585.1	RVD2	RVD2	14.64	15.36	15503739	15503793	23	T AGAGATATTGAACTTT	T GATGAACTTTCACTAT	30
NC_070589.1	RVD2	RVD2	16.66	13.35	32212486	32212534	17	T AAAAAAGTTAAAATAC	T GCAAATCTTTGACTTT	30.01
NC_070591.1	RVD2	RVD2	16.37	13.64	20008838	20008892	23	T GCAACAATTTAAATAA	T GAAGATATCTAACTTT	30.01
NC_070601.1	RVD2	RVD2	15.32	14.7	2577945	2577992	16	T CAAGAAGTCTAAATAT	T GAAAACCTTTATCTAT	30.02
NC_070597.1	RVD2	RVD2	9.64	20.38	11864000	11864053	22	T GAAGCTCTTTGACTAT	T GGCTATGGTTAAGTCT	30.02
NC_070585.1	RVD2	RVD2	16.99	13.03	34276907	34276956	18	T GGCGCCTTTTAAATAT	T ACCGGTACTTAACTAT	30.02
NC_070598.1	RVD2	RVD2	14.66	15.36	17838191	17838236	14	T AAAAACATCTGAATAT	T GCACATATTTGACTGA	30.02
NC_070585.1	RVD2	RVD1	13.9	16.12	12852021	12852068	15	T GGAGGAGTTTCACTTT	T TTCACCTCTATGGACTA	30.02
NC_070585.1	RVD2	RVD2	16.99	13.03	34285257	34285306	18	T GGCGCCTTTTAAATAT	T ACCGGTACTTAACTAT	30.02
NC_070579.1	RVD2	RVD2	16.51	13.51	18123714	18123764	19	T AAAACAGTGTAAATAT	T ACAAATGTTTAAATAC	30.02
NC_070589.1	RVD2	RVD2	15.19	14.83	4655828	4655878	19	T AAACATGCATAACTAC	T GTACATATTAGACTAC	30.02
NC_070584.1	RVD2	RVD2	15.89	14.14	7082468	7082510	11	T GAAACACTTAGCCTAT	T GAAAATAAATGACCAT	30.03
NC_070578.1	RVD2	RVD2	15	15.03	39931666	39931712	15	T TAAGTTATGTAACTAT	T CCAGCTGTTTAAACAT	30.03
NC_070599.1	RVD2	RVD2	18.3	11.73	10029469	10029522	22	T GGAAACATTTGCACAA	T GGAGAAATATGACTAT	30.03
NC_070587.1	RVD2	RVD2	11.93	18.11	1253769	1253812	12	T AAAGGAGTTTAACTAC	T AGAGCAGTGTAAAAAT	30.04
NC_070600.1	RVD2	RVD2	12.43	17.61	22047151	22047194	12	T GAACATATTTAATTAT	T GGTTATATTTGAATAA	30.04
NC_070598.1	RVD2	RVD2	17.74	12.3	2595396	2595438	11	T ACAGCTCATTTACGAT	T GGAAATGTTTCACTTT	30.04
NC_070579.1	RVD2	RVD2	14.92	15.13	2257458	2257506	17	T AAACACATTTAAGTAT	T AAAAGTAACTGACTAG	30.05
NC_070578.1	RVD2	RVD2	13.51	16.54	20615217	20615264	16	T CAAGATATATAAATAT	T ATAAACATTTTAATAT	30.05
NC_070579.1	RVD2	RVD2	11.77	18.28	18395208	18395262	23	T GGAAATGTTTTACTAC	T AAAGCAATTTTATTAA	30.05
NC_070592.1	RVD2	RVD2	19.24	10.82	4160298	4160354	25	T AAAACAGTTCAACACA	T TCAAGTATTTGACTAT	30.06
NC_070579.1	RVD2	RVD2	14.21	15.85	3977446	3977495	18	T AAAGACATTTTCCTAT	T TGATGTATTAAACTCT	30.06
NC_070591.1	RVD2	RVD2	13.03	17.03	1502443	1502486	12	T AAAGATCATTGACTCT	T GATACTATTTAAATAA	30.06
NC_070582.1	RVD2	RVD2	15.69	14.37	5047328	5047373	14	T AAATATGTCTATCTAT	T AGAAATAATTAACCCT	30.06
NC_070591.1	RVD2	RVD2	15.6	14.46	28874533	28874580	16	T ATAACTATTTCACTGT	T GAAAGTGTGTAAGTAT	30.06
NC_070581.1	RVD2	RVD2	17.93	12.13	4727022	4727063	10	T TGAAATCCTTCACACT	T AAAGGTATTAAACCAT	30.06
NC_070583.1	RVD2	RVD2	17.07	12.99	4734049	4734094	14	T ATATATATAACACTAT	T GGAAATATAACACTAT	30.06
NC_070578.1	RVD2	RVD2	13.41	16.66	36776284	36776333	18	T TAAGATATTTAATTAT	T AAAAAAGCTCAAATAT	30.07
NC_070592.1	RVD2	RVD2	16.1	13.97	14315938	14315992	23	T GGAATTGTTCAAATAA	T GTAAATGATTAACTAA	30.07
NC_070580.1	RVD2	RVD2	19.42	10.65	2308350	2308398	17	T ATAAGTATTAAATAAA	T AAAAATATTTGAATAT	30.07
NC_070592.1	RVD2	RVD2	16.26	13.82	8826337	8826383	15	T GGAAGAATTAAAAAAT	T ACAAGGTTTTGACTAT	30.08
NC_070582.1	RVD2	RVD2	20.15	9.93	28372730	28372774	13	T AAACATATTAATTCAT	T AGAAGAATTTGACTAT	30.08
NC_070598.1	RVD2	RVD2	15.82	14.26	2757315	2757359	13	T GAAACCTTTTGACGAT	T GGAGACATTTAAACAT	30.08
NC_070598.1	RVD2	RVD2	13.55	16.54	68011	68066	24	T ACATATATTTAAATAT	T ATAAATATATTAATAT	30.09
NC_070580.1	RVD2	RVD2	16.87	13.23	39130011	39130053	11	T TTAACAGTTTAACAAT	T TAAACTATTAAACTAT	30.1
NC_070590.1	RVD2	RVD1	13.94	16.16	9870595	9870642	15	T GGAAACGTTCAACCAT	T TCCTCTTCTCTGGCAAA	30.1
NC_070586.1	RVD2	RVD2	21.12	8.98	30285666	30285721	24	T AAACCTCCAAAACAAA	T GCAAATATTTGACTAT	30.1
NC_070586.1	RVD2	RVD2	14.54	15.56	22391226	22391278	21	T AAAAAAATCTAACCAT	T CAAGATAATTCACTTT	30.1
NC_070590.1	RVD2	RVD2	18.06	12.04	25813535	25813591	25	T CAAACCAAATGACTAA	T ACAAAACTTTGACTAT	30.1
NC_070580.1	RVD2	RVD2	15.97	14.14	10735629	10735670	10	T GTAGGTTTTTAAATCT	T AGAAATGTCTAACAAA	30.11
NC_070586.1	RVD2	RVD2	14.17	15.94	21141760	21141807	16	T GTAAATAATTAACTAA	T GGAGGACTTTTACTTT	30.11
NC_070583.1	RVD2	RVD1	16.51	13.6	23160710	23160757	15	T GAAGATATTTCTCAAA	T TCCATTAATATAATCCA	30.11
NC_070594.1	RVD2	RVD1	16.97	13.15	16121967	16122015	16	T GGATAAATTGAACAAT	T TCCACCTCTGTGGACCA	30.12
NC_070578.1	RVD2	RVD2	15.89	14.23	23195294	23195345	20	T CACCGTGTTTAACCAA	T CAAAGTATTTGATTAA	30.12
NC_070578.1	RVD2	RVD2	14.01	16.11	12863161	12863204	12	T TAAATTGTCTAACTAT	T TAAGATCTTTGCTTAT	30.12
NC_070591.1	RVD2	RVD2	18.19	11.93	11881558	11881599	10	T GAACAAATGAAACTAA	T AGAGATATCTGACCAT	30.12
NC_070584.1	RVD2	RVD2	16.93	13.19	10516066	10516115	18	T GAATATATTTAATTGT	T ACAAATATCTGACAAT	30.12
NC_070599.1	RVD2	RVD2	18.48	11.64	10687063	10687110	16	T GAAAATGGTTTTCAAT	T AGACGTCTTTGACTAA	30.12
NC_070592.1	RVD2	RVD2	16.05	14.08	1181171	1181226	24	T AAAAATACTTAACTTA	T ATAAAACTTTCACTAT	30.13
NC_070594.1	RVD2	RVD2	15.84	14.29	12848393	12848449	25	T GCAGGTATATGATCAT	T GGAAATGATTAAATCT	30.13
NC_070596.1	RVD2	RVD2	12.25	17.88	19180880	19180928	17	T GAAGAAGTTTAAATAT	T GCAGGCTTTTAATAAT	30.13
NC_070585.1	RVD2	RVD2	19.54	10.59	26350418	26350465	16	T AAATGTCTATAACTGG	T GCAGATGTTTGACTAC	30.13
NC_070587.1	RVD2	RVD2	17.9	12.23	31438838	31438886	17	T TAAATTGGTTCACTCT	T CAAAATGTTTGATTAT	30.13
NC_070593.1	RVD2	RVD2	13.17	16.96	13401388	13401437	18	T GAAAATGCTTGATTAT	T AGTGAAATTTGACTTT	30.13
NC_070580.1	RVD2	RVD2	17.14	12.99	17238000	17238046	15	T GCAGGTTGTTAGCTAT	T GAAAGTATCTCACAAT	30.13
NC_070579.1	RVD2	RVD2	17.49	12.65	11962169	11962224	24	T GTAGATACTTAACAGT	T AAAAATGTTTAAATAC	30.14
NC_070586.1	RVD2	RVD2	19.22	10.92	29957845	29957900	24	T GTAAATATTTAAGTGC	T GGAAAGATTTGACTAT	30.14
NC_070585.1	RVD2	RVD2	17.35	12.79	26853436	26853482	15	T AACCATGTTAGAACAT	T GAACATGACTGACTAT	30.14
NC_070582.1	RVD2	RVD2	13.44	16.7	16619814	16619868	23	T GGAAATATCTGACTGT	T ATAAATATATAAATAA	30.14
NC_070598.1	RVD2	RVD2	18.1	12.05	24597443	24597496	22	T GTAGAAGTCTAAATAA	T GAAAGTGTCTGAATAT	30.15
NC_070587.1	RVD2	RVD2	11.78	18.37	21325833	21325878	14	T AGAGATGTTGCACTAT	T GTGGTTGTTTAATTAT	30.15
NC_070587.1	RVD2	RVD2	17.98	12.17	3604073	3604126	22	T AAATGTGAACAACCAT	T GAAAATATTTGACTCA	30.15
NC_070578.1	RVD2	RVD2	14.7	15.45	4543269	4543320	20	T GGACCTCTTAAACTAA	T GAAGATACTCGACTGT	30.15
NC_070589.1	RVD2	RVD2	15.07	15.09	3584566	3584608	11	T TCAAATGTTTACCCAT	T GAAAATATTTAATTGT	30.16
NC_070592.1	RVD2	RVD2	16.46	13.71	9566451	9566493	11	T GAAAGAAATAAAATAT	T AAACATATTTAAACAT	30.17
NC_070593.1	RVD1	RVD2	16.03	14.14	10508758	10508803	13	T TAATCTTCTATAATCCT	T GAAAATGCTAAACTAA	30.17
NC_070582.1	RVD2	RVD2	13.76	16.41	29775702	29775754	21	T GCAACTCTTTCACCAT	T AAAGATGTTTAATGCT	30.17
NC_070583.1	RVD2	RVD2	17.33	12.84	24625031	24625083	21	T ACAACTGATTACTTAT	T ACAAGGGTTTCACTAT	30.17
NC_070592.1	RVD2	RVD2	15.38	14.8	17389750	17389805	24	T GAAGAAATTAAATTAT	T GGAAATTGTTTACTAT	30.18
NC_070588.1	RVD2	RVD2	11.64	18.54	64155	64197	11	T AAAGATGTTTAACTTT	T AAATGAATATAAATCT	30.18
NC_070584.1	RVD2	RVD2	13.19	16.99	23613612	23613661	18	T ACAAATGTATAACTAC	T GACGTTGTTTCAACAT	30.18
NC_070578.1	RVD2	RVD2	14.89	15.29	2655227	2655280	22	T GGAAATATTTAATTTT	T GAAATTGTATGACTTT	30.18
NC_070584.1	RVD2	RVD2	16.08	14.1	12339436	12339479	12	T GGTAGTGTTGGCCTAT	T GAATGTATATGAATAT	30.18
NC_070597.1	RVD2	RVD1	14.99	15.19	3766753	3766801	16	T AAAGCAGCTTAACTAA	T GACGCTCCTCTAATCCA	30.18
NC_070582.1	RVD2	RVD2	13.57	16.61	27798427	27798483	25	T GAAAGTGTTTGTATAT	T TGAGTTAGCTGACTAT	30.18
NC_070587.1	RVD2	RVD2	14.74	15.45	30116104	30116148	13	T AAAAGTCTTTACCTGT	T GGAAATATTGAAATAC	30.19
NC_070592.1	RVD2	RVD2	11.81	18.38	22695726	22695774	17	T GAATGTATTTGCCTAT	T GCCAATGTTTTTCCAT	30.19
NC_070588.1	RVD2	RVD2	17.29	12.9	10305285	10305335	19	T GAAAGTTTTAGGCTAC	T CCACATGTTTAACTAA	30.19
NC_070592.1	RVD2	RVD2	14.74	15.45	12232069	12232115	15	T CAAGGTCCTTCACTCT	T GCAGCTGATTGACAAC	30.19
NC_070583.1	RVD2	RVD2	18.22	11.97	21687779	21687825	15	T AGCAACTTTAAACAAT	T GGCAATATTTGACTAA	30.19
NC_070588.1	RVD2	RVD2	14.13	16.06	2775619	2775669	19	T TGAAATGTTTTAATAT	T TAATCTATTGAACTAT	30.19
NC_070579.1	RVD2	RVD1	14.66	15.53	18682336	18682382	14	T AAAAAAATTTGAAAAT	T TAGTCTTCTAAGATCCA	30.19
NC_070597.1	RVD2	RVD2	14.5	15.69	27318348	27318389	10	T TAAAATGTTTAAAAAT	T AAATGTATTAAACTTT	30.19
NC_070596.1	RVD2	RVD2	18.22	11.98	24238832	24238883	20	T GCTGTTATTTGCCTCT	T CAAAGGGTTTAACTAT	30.2
NC_070581.1	RVD2	RVD2	17.97	12.23	11866228	11866282	23	T AGAGACATTAATATAT	T AAAGATGTTTCATTAT	30.2
NC_070578.1	RVD2	RVD2	17.36	12.85	29524119	29524173	23	T TAACATAATTGAATAA	T AAAAATATCTAAATAT	30.21
NC_070584.1	RVD2	RVD2	18.24	11.97	2658579	2658628	18	T AAAGCAATATGATCAT	T AGCGATGTATAACTAT	30.21
NC_070599.1	RVD2	RVD2	13.37	16.84	3498444	3498489	14	T GAAGATATTTAATTAC	T TCAGAAGTCAAACTAT	30.21
NC_070598.1	RVD2	RVD2	20.25	9.97	8493559	8493611	21	T TCACATTATTAAACAT	T AAATGTGTTTAACTAT	30.22
NC_070578.1	RVD2	RVD2	13.78	16.44	8536381	8536430	18	T AGAGATGTTTCACCAG	T GCAGGCTCTTGACTAA	30.22
NC_070583.1	RVD2	RVD2	11.11	19.11	32419974	32420018	13	T GAAACTGTTTGAATAT	T CCACTTATCTTAATAT	30.22
NC_070581.1	RVD2	RVD2	14.5	15.72	28498257	28498312	24	T GAACACATTTGACTTT	T TCAGATCTTTGACACT	30.22
NC_070596.1	RVD2	RVD2	16.17	14.05	9172084	9172139	24	T GAGAATATTTAAATAC	T ATATATTTTTAACTAT	30.22
NC_070587.1	RVD2	RVD1	15.24	14.98	13492819	13492867	16	T CAAAATAGTTCACAAT	T TCCCTTTCCATGGTCTA	30.22
NC_070595.1	RVD2	RVD2	14.9	15.32	9997695	9997739	13	T TAAACTGTTTTACTCT	T AGAACCATCTGAATAT	30.22
NC_070582.1	RVD2	RVD2	14.25	15.97	24652593	24652643	19	T CCAAATATAAAACTAT	T GCAGCTGTTTAAAAAA	30.22
NC_070596.1	RVD2	RVD2	18.3	11.93	27275786	27275832	15	T GGCAAAGATTAAATAC	T GGAAAAGTTTAACCAT	30.23
NC_070584.1	RVD2	RVD2	12.17	18.06	6436517	6436564	16	T AAATGTATTTAACTAA	T TTAACTATTGAACCAT	30.23
NC_070580.1	RVD2	RVD2	14.26	15.97	1209678	1209722	13	T GAAAGTGTTCAAATAA	T AAAAATGTTTGTATAA	30.23
NC_070582.1	RVD2	RVD1	16.09	14.14	7909281	7909335	22	T ACAGACAATTCCCTAT	T TCTACCTCTATACACCA	30.23
NC_070595.1	RVD2	RVD2	16.75	13.48	21815939	21815981	11	T GAACTTCTTCCACCAT	T GGAAATATTTTACTTT	30.23
NC_070588.1	RVD2	RVD2	15.29	14.94	24433486	24433534	17	T GATGGATTTTAACTAT	T ACAGATCTTTCACTCC	30.23
NC_070578.1	RVD2	RVD2	12.63	17.6	34307909	34307950	10	T GGAGTTATTTCACTAC	T CCAGCTGCTACCCTAT	30.23
NC_070589.1	RVD2	RVD2	13.26	16.97	4177246	4177301	24	T ACCAATGTTTAACTCT	T AGAAATGTGCTACAAT	30.23
NC_070596.1	RVD2	RVD1	16.47	13.77	2765830	2765875	13	T TGAGGAGTTACCCTAT	T ACCGCTTTTCTGCTCCA	30.24
NC_070589.1	RVD2	RVD2	14.95	15.29	34104511	34104565	23	T GCAGGTATTTTAATAC	T GCACATATTAAATTAT	30.24
NC_070592.1	RVD2	RVD2	12.23	18.01	15575342	15575385	12	T GCAAATGTTTAATTAT	T AAAAATTTTTGAATGC	30.24
NC_070580.1	RVD2	RVD2	10.65	19.59	38589196	38589250	23	T AGAAATATTTAAATAT	T CAAAGTGTTTTTTTAC	30.24
NC_070595.1	RVD2	RVD2	17.6	12.65	27763378	27763421	12	T AAAGCTACTTCCCTGT	T AAAAGTATTTAAAAAT	30.25
NC_070600.1	RVD2	RVD2	13.03	17.22	20311615	20311667	21	T ACATGTATTTAACTAA	T GGCAACACTTGATTAT	30.25
NC_070586.1	RVD2	RVD1	15.09	15.16	25355229	25355276	15	T AGAAATATTTATTTAT	T ATCACTTCTCTTATCCA	30.25
NC_070587.1	RVD2	RVD2	14.23	16.02	18295581	18295626	14	T GAAAGTCCTTAATTAT	T GAAACGATTAGCCTAT	30.25
NC_070587.1	RVD2	RVD2	16.54	13.71	14580511	14580561	19	T ATAACTGTTTATCAAT	T AAAAATATTACAATAT	30.25
NC_070584.1	RVD2	RVD2	14.34	15.92	30232638	30232689	20	T AAAAGCAATAAACTAT	T GGAGAGATGTAACCAT	30.26
NC_070580.1	RVD2	RVD2	16.87	13.39	22400875	22400920	14	T AAATCATTTTGACTAC	T ACAAATATAAAACTAT	30.26
NC_070581.1	RVD2	RVD2	9.93	20.33	4332441	4332482	10	T AGAGATGTTTAACCAT	T TGAGGCAATTGGTTAT	30.26
NC_070594.1	RVD2	RVD2	9.93	20.33	31814742	31814783	10	T AGAGATGTTTAACCAT	T TGAGGCAATTGGTTAT	30.26
NC_070598.1	RVD2	RVD2	17.61	12.65	27448739	27448790	20	T GAATGTAATTGTATAT	T AAAAATATTTGAATAA	30.26
NC_070588.1	RVD2	RVD2	12.53	17.74	12596493	12596546	22	T AAAAAAATTTAACAAT	T CAAATTATTTAACGTT	30.27
NC_070581.1	RVD2	RVD2	16.14	14.13	16263993	16264044	20	T AAATGATTTTGAATAT	T TGAATTATTTGAATAT	30.27
NC_070581.1	RVD2	RVD2	12.28	17.99	17883477	17883518	10	T AAACATCTTTACCTAT	T CAACGTTTATCATTAT	30.27
NC_070587.1	RVD2	RVD2	16.43	13.84	15901348	15901390	11	T AAACATATTTAAGTTT	T GATAATATTTAACAAT	30.27
NC_070585.1	RVD2	RVD2	13.81	16.46	6255080	6255126	15	T GTAGATTTTCAACTAT	T AGAAAAACATGAATAT	30.27
NC_070594.1	RVD1	RVD1	15.73	14.54	8682392	8682444	19	T TCCTCTTCAATAATGAA	T TCCACTGCTTTAAACCA	30.27
NC_070585.1	RVD2	RVD2	16.64	13.64	21840644	21840699	24	T AAACAAATTTAATTAA	T AATGATATCTGACTAT	30.28
NC_070586.1	RVD2	RVD2	16.93	13.35	14860156	14860205	18	T GTAGATTTTGGAATAT	T CCAAATGTTTGACTTT	30.28
NC_070588.1	RVD2	RVD2	15.45	14.83	28219553	28219605	21	T GTAGGAGTTTTCCTAT	T CAATGTGATCAACTAT	30.28
NC_070582.1	RVD2	RVD2	17.09	13.19	14585861	14585917	25	T GCAACTATTAGATAAT	T CAAAATAATTGACAAT	30.28
NC_070589.1	RVD2	RVD2	14.43	15.85	17066308	17066350	11	T ACAAATGTATAATTAT	T AAAAAAGTTTAACTTA	30.28
NC_070579.1	RVD1	RVD2	16.19	14.1	18472272	18472329	25	T TCCACATATGTAATACA	T GGAAGCATTTTAATAT	30.29
NC_070584.1	RVD2	RVD2	14.21	16.09	13456688	13456739	20	T AACAATTTTTGACCAT	T CACACAAATTGACTAT	30.3
NC_070584.1	RVD2	RVD2	12.25	18.06	1698123	1698170	16	T AAAAGTGTTTGAACAT	T GCAGCTGTCTCTCTCT	30.31
NC_070586.1	RVD2	RVD2	17.45	12.86	9578087	9578134	16	T GAAAGTATTAGACCTC	T AAAGCTGTTTTACTCT	30.31
NC_070592.1	RVD2	RVD2	14.01	16.3	7471145	7471196	20	T GAAAATGATTGCCTCT	T ATAGGAATTAAAATAT	30.31
NC_070585.1	RVD2	RVD2	12.04	18.27	31526208	31526253	14	T CCAAATAATTGACTAT	T GCATGTGTTTGTATAA	30.31
NC_070579.1	RVD2	RVD2	12.49	17.82	35374075	35374127	21	T TAAGATATTTAAATAT	T AAACAGGTTTGGATAT	30.31
NC_070589.1	RVD2	RVD2	14.1	16.21	17020749	17020790	10	T GTAGATGTCTAAATAT	T AACTAAAATTGACTAT	30.31
NC_070601.1	RVD2	RVD2	17.53	12.79	7193925	7193973	17	T AAAAAAATAAAACTAG	T AGAGAAGTTTCACAAT	30.32
NC_070590.1	RVD2	RVD2	16.5	13.82	22741810	22741858	17	T AAAGAAATTAGAATCT	T AAAGGTTTTGCACTAT	30.32
NC_070579.1	RVD2	RVD2	18.81	11.51	25835117	25835171	23	T TAAAGATTTTGACCAG	T ACAGATATTTAAATAT	30.32
NC_070591.1	RVD2	RVD2	19.4	10.92	8818606	8818658	21	T TCAACTGATTATCAAT	T GGAAATGTTGAACTAT	30.32
NC_070583.1	RVD2	RVD2	16.41	13.92	35357812	35357862	19	T TACAATATAAAACTAT	T TAATATCTTTCACTAT	30.33
NC_070598.1	RVD2	RVD2	13.23	17.1	27871103	27871157	23	T CACAGTATTTAACAAT	T CAATCTGTTTCCATAT	30.33
NC_070581.1	RVD2	RVD1	14.38	15.95	4704420	4704468	16	T AAAAAGCTTCAACTAT	T TCCTCTTTTCTGAGCCA	30.33
NC_070579.1	RVD2	RVD2	17.79	12.54	13707501	13707553	21	T GCAGCTGTTTCATACT	T TGACCTGTTTCACTAT	30.33
NC_070582.1	RVD2	RVD2	18.78	11.57	10310603	10310649	15	T GGAGAGACGTCACAAT	T GGAGATGTTTTACAAT	30.35
NC_070599.1	RVD2	RVD2	14.17	16.18	6283078	6283131	22	T GAAAATGTATAACTCA	T AAAAAAGTATTACTAC	30.35
NC_070587.1	RVD2	RVD2	16.1	14.25	17860312	17860360	17	T GGAGATTTTAAAAAAT	T AACTATTTTTAACTAT	30.35
NC_070593.1	RVD2	RVD2	15.65	14.7	6316377	6316418	10	T AAAAATAAGTGAATAT	T CCAGCAGTTCAACTAT	30.35
NC_070593.1	RVD2	RVD2	13.11	17.24	17628510	17628557	16	T GCAGGTATTTAAAAAT	T ACACAAATTTAACAAG	30.35
NC_070596.1	RVD2	RVD2	14.17	16.19	14041939	14041995	25	T AAAGGAATTTAACCCT	T ACAGAGATTTAACAAA	30.36
NC_070597.1	RVD2	RVD2	13.62	16.74	8471598	8471641	12	T GGATCTATTGGACTAT	T ATAAATCTTTAACAGT	30.36
NC_070590.1	RVD2	RVD2	18.33	12.03	29404084	29404135	20	T GAAGTTGCTTGATTGT	T GAAACTGTTTGATTAT	30.36
NC_070582.1	RVD2	RVD2	16.94	13.43	6930250	6930305	24	T GCAAATCCTTCACTCA	T AAAACTATTTAACCCT	30.37
NC_070585.1	RVD2	RVD2	12.49	17.88	32671244	32671300	25	T GTAAATATTTAAATAT	T GAAAATCTTTCAAAGT	30.37
NC_070581.1	RVD2	RVD2	16.31	14.06	10477255	10477302	16	T AGACATGTCAGACTTT	T GGAGATGTTAAAAAAT	30.37
NC_070584.1	RVD2	RVD2	18.21	12.17	34161480	34161521	10	T TAAACTCTTTGAAAAA	T AAAGATATTTTACAAT	30.38
NC_070601.1	RVD2	RVD2	12.45	17.93	2728877	2728920	12	T GAAAATGTTTAAATAA	T TTAACAATTTCACAAT	30.38
NC_070580.1	RVD2	RVD2	12.37	18.01	18517600	18517650	19	T AAAATTATTTAACCAT	T TGAAATATATATATAT	30.38
NC_070588.1	RVD2	RVD2	11.97	18.41	24566781	24566825	13	T AAAGATGTATGCCTAT	T CAAGATCTAAAAATCT	30.38
NC_070590.1	RVD2	RVD2	15.69	14.7	13946024	13946065	10	T GGCAGTCTATCACTAC	T GCAAACATTTAACTGT	30.39
NC_070582.1	RVD2	RVD2	18.35	12.04	29338774	29338828	23	T GAAGCAATTTTACATT	T AGAAATCTTCCACTAT	30.39
NC_070591.1	RVD2	RVD2	14.05	16.34	24038015	24038059	13	T AGAAATCTTCCACAAT	T AGTGCTGTCTAACTCT	30.39
NC_070587.1	RVD2	RVD2	21.86	8.53	6344112	6344161	18	T ATATATGTATATAAAT	T AAAAATATTTAACTAT	30.39
NC_070595.1	RVD2	RVD2	17.36	13.03	12160446	12160494	17	T CAAATTAATTGAAAAT	T CAAATTGCTTAACTAT	30.39
NC_070589.1	RVD2	RVD2	12.17	18.22	10776969	10777013	13	T ATAAATGTTAAACTAT	T TACAGCATCTAACAAT	30.39
NC_070587.1	RVD2	RVD2	13.03	17.36	3459901	3459948	16	T AGATAACTTTAACTAT	T CAAAATGTATTAATAA	30.39
NC_070596.1	RVD2	RVD2	15.19	15.21	21584822	21584869	16	T GAAAAAAAATCACTAT	T GACAGTATATGATTAT	30.4
NC_070599.1	RVD2	RVD2	16.34	14.06	15464988	15465029	10	T TGAACTAGTTAAATAT	T AGAGATGTTTGAAAAC	30.4
NC_070585.1	RVD2	RVD2	14.67	15.73	10811384	10811439	24	T GAAGCTTTTAGCCTAT	T GGAGGTTTTTGAATCA	30.4
NC_070598.1	RVD1	RVD2	9.27	21.14	12023858	12023912	22	T TCCATTTCTATAATCCA	T GGAATAATTGTAAAAT	30.41
NC_070599.1	RVD2	RVD2	12.76	17.65	16225437	16225483	15	T AGAGGTATTTTACTAG	T TAAGCTGTTTGGCTGT	30.41
NC_070580.1	RVD2	RVD2	20.08	10.33	31124424	31124473	18	T ACTTGTAATTAAGTAT	T AAAAGTATTTAACTAA	30.41
NC_070594.1	RVD1	RVD2	16.28	14.14	12848793	12848838	13	T TCTACCTCTAGAACCCA	T AAAGGCATTAAACAAT	30.42
NC_070580.1	RVD2	RVD2	15.89	14.54	2427906	2427954	17	T GAAACTCATATACTAT	T TGAAATATTTCACTTT	30.43
NC_070595.1	RVD2	RVD2	17.2	13.23	7510598	7510640	11	T GCAGCATTTTATCTAT	T ACATATATTAAACTAT	30.43
NC_070583.1	RVD2	RVD2	14.54	15.89	7875499	7875547	17	T TGAAATATTTCACTTT	T GAAACTCATATACTAT	30.43
NC_070589.1	RVD2	RVD2	17.61	12.83	27919440	27919493	22	T GTTAGAGTTTAAATAT	T ACAGTTGTTTAACTAA	30.44
NC_070581.1	RVD2	RVD2	18.31	12.13	22238200	22238244	13	T CACATTAATTGATTAT	T AGAAGTATATAACAAT	30.44
NC_070580.1	RVD2	RVD2	15.25	15.19	25563550	25563597	16	T AGAAGTATCTGAAGAT	T CAAATTGTTTTAATAT	30.44
NC_070589.1	RVD2	RVD2	19.25	11.19	18029120	18029170	19	T CCAAAGATCAAACTAC	T GAAAATACTTCACTAT	30.44
NC_070581.1	RVD2	RVD2	20.31	10.13	2165148	2165199	20	T GGGGCATTTTTAATAT	T GAAAAAGTTTAACTAT	30.44
NC_070584.1	RVD2	RVD2	14.5	15.94	24248148	24248203	24	T GAAAATGTCTCACTTT	T GAAAGTGACCAACAAT	30.44
NC_070596.1	RVD2	RVD2	14.08	16.36	10882821	10882863	11	T CAAACTGATTAACTCT	T GAAGGCATTTCAGTCT	30.44
NC_070588.1	RVD2	RVD2	14.72	15.72	8670485	8670531	15	T ACAAATGTTAAAGTAT	T AAAACTAATTAAATAC	30.44
NC_070597.1	RVD2	RVD2	16.24	14.21	26593056	26593107	20	T AGAGATAGTTGAAGAT	T TACAGTATTTAACAAT	30.45
NC_070580.1	RVD2	RVD2	13.88	16.57	24960788	24960830	11	T CAAACTGTATTACTAT	T TTCAATATTTAAATAT	30.45
NC_070591.1	RVD2	RVD2	17.21	13.24	28158224	28158279	24	T AACCATCTTTCCCTCT	T AGAAGTGTCTGGCTAT	30.45
NC_070579.1	RVD2	RVD2	10.72	19.73	10628461	10628511	19	T GGAAGTGTTTAACTAG	T GACAACATTTGGCTCC	30.45
NC_070597.1	RVD2	RVD1	16.05	14.41	7676166	7676211	13	T AGAACTATATCACAAA	T ACCACTCCTGTCATCCA	30.46
NC_070579.1	RVD2	RVD1	17.76	12.7	35692000	35692044	12	T CAACATAATTAGCTAA	T TCCAGTTCTATGGTGCA	30.46
NC_070578.1	RVD2	RVD2	19.27	11.19	18510111	18510156	14	T CAAAATGTGTTATAAT	T AAAAATCCTTGACTAT	30.46
NC_070590.1	RVD2	RVD2	19.48	10.99	8810847	8810890	12	T ACACAACTTTCACCTT	T GCAAATGTTTAACCAT	30.47
NC_070587.1	RVD2	RVD2	15.32	15.15	19046294	19046341	16	T GCAGAAATTCAAATAT	T ACCAGTGTATGAATAT	30.47
NC_070595.1	RVD2	RVD2	16.37	14.1	20843705	20843754	18	T GTCAATATTTTAATAT	T GCAGGTATTTGGCCAT	30.47
NC_070578.1	RVD2	RVD2	17.16	13.31	22065858	22065914	25	T GTACAAAATTGAATAT	T GCAAATACTTGAATAT	30.47
NC_070588.1	RVD2	RVD2	10.9	19.57	22444378	22444422	13	T CAACATGTTTCACTAT	T AACATTTTATGTCTAT	30.47
NC_070580.1	RVD2	RVD2	13.11	17.36	32150960	32151016	25	T AGACATGTTTGAACAT	T TAAGATATATCAACAT	30.47
NC_070583.1	RVD2	RVD2	13.45	17.03	36533890	36533940	19	T GGAGCTCTTTGACCAC	T GAAAAACTTTAAATGT	30.48
NC_070583.1	RVD2	RVD2	13.45	17.03	36638302	36638352	19	T GGAGCTCTTTGACCAC	T GAAAAACTTTAAATGT	30.48
NC_070583.1	RVD2	RVD2	13.45	17.03	36681405	36681455	19	T GGAGCTCTTTGACCAC	T GAAAAACTTTAAATGT	30.48
NC_070596.1	RVD2	RVD2	17.03	13.45	30926346	30926396	19	T GAAAAACTTTAAATGT	T GGAGCTCTTTGACCAC	30.48
NC_070587.1	RVD2	RVD2	8.98	21.5	20516687	20516732	14	T ACAGATGTTTAACTAT	T CCAGCATTTTATTTAT	30.48
NC_070583.1	RVD2	RVD2	13.45	17.03	36595673	36595723	19	T GGAGCTCTTTGACCAC	T GAAAAACTTTAAATGT	30.48
NC_070596.1	RVD2	RVD2	17.03	13.45	30907711	30907761	19	T GAAAAACTTTAAATGT	T GGAGCTCTTTGACCAC	30.48
NC_070583.1	RVD2	RVD2	17.03	13.45	37238619	37238669	19	T GAAAAACTTTAAATGT	T GGAGCTCTTTGACCAC	30.48
NC_070586.1	RVD2	RVD2	15.45	15.03	32577185	32577227	11	T GAAGGTATACATCTAT	T GAACATAACTGACTCT	30.48
NC_070590.1	RVD2	RVD2	13.45	17.03	2718758	2718808	19	T GGAGCTCTTTGACCAC	T GAAAAACTTTAAATGT	30.48
NC_070583.1	RVD2	RVD2	13.45	17.03	36612923	36612973	19	T GGAGCTCTTTGACCAC	T GAAAAACTTTAAATGT	30.48
NC_070583.1	RVD2	RVD2	13.45	17.03	36655482	36655532	19	T GGAGCTCTTTGACCAC	T GAAAAACTTTAAATGT	30.48
NC_070586.1	RVD2	RVD2	11.38	19.1	21553889	21553932	12	T GCAGGTGTTGGACTAT	T GAAGTGGTATAAAAAT	30.48
NC_070583.1	RVD2	RVD2	13.45	17.03	36632841	36632891	19	T GGAGCTCTTTGACCAC	T GAAAAACTTTAAATGT	30.48
NC_070583.1	RVD2	RVD2	13.45	17.03	36582696	36582746	19	T GGAGCTCTTTGACCAC	T GAAAAACTTTAAATGT	30.48
NC_070590.1	RVD2	RVD2	13.45	17.03	2252056	2252106	19	T GGAGCTCTTTGACCAC	T GAAAAACTTTAAATGT	30.48
NC_070583.1	RVD2	RVD2	13.45	17.03	36604589	36604639	19	T GGAGCTCTTTGACCAC	T GAAAAACTTTAAATGT	30.48
NC_070583.1	RVD2	RVD2	13.45	17.03	36685179	36685229	19	T GGAGCTCTTTGACCAC	T GAAAAACTTTAAATGT	30.48
NC_070583.1	RVD2	RVD2	14.67	15.81	18488302	18488355	22	T TGAGATCATTGACTCT	T GCAGGTGTTACAATCT	30.48
NC_070594.1	RVD2	RVD2	15.19	15.29	12835362	12835408	15	T GCAAACATTTAACCAA	T GAAAGATTTTGACTGT	30.48
NC_070579.1	RVD2	RVD2	13.64	16.85	18988476	18988528	21	T AAAAGTAATTGACTTT	T GAAGGTGGATGAAAAT	30.49
NC_070595.1	RVD2	RVD2	20.1	10.39	28569712	28569755	12	T TAACCAAATAAACAAT	T GCAGGTGTTTGACTAA	30.49
NC_070584.1	RVD2	RVD2	13.61	16.88	24427537	24427586	18	T AAAAATATTTTATTAT	T GCCAAGGTTTCACAAT	30.49
NC_070583.1	RVD2	RVD2	17.32	13.17	29337414	29337455	10	T GGACAAAATCAAATAT	T AAAGGTATTTGATTAA	30.49
NC_070580.1	RVD2	RVD2	15.04	15.45	5985843	5985890	16	T AGAAAACTGTCACTAT	T GAGAATGATTGACCAT	30.49
NC_070579.1	RVD2	RVD2	14.25	16.24	13725554	13725596	11	T AAAACCATTTCACAAT	T GAAGCTAATTAATTAA	30.49
NC_070582.1	RVD1	RVD2	14.12	16.38	30909826	30909870	12	T TTCGCTTTTACAGTCCA	T AAAAACATTATACCAT	30.5
NC_070601.1	RVD2	RVD2	12.33	18.17	13957017	13957059	11	T GAAAATATTAAACTAA	T GGAAGTTTTACAGTAC	30.5
NC_070593.1	RVD1	RVD2	16.24	14.26	26050670	26050713	11	T ACCACTTAACTTATCCA	T AGAAGTGTATAAATAC	30.5
NC_070589.1	RVD2	RVD2	13.11	17.4	20466550	20466601	20	T GGAAATCTTAGAATAT	T AAACATCTTTGAATCG	30.51
NC_070584.1	RVD2	RVD2	10.59	19.92	13802553	13802597	13	T CGAGATGTTTGACCAT	T GAAAATCTTACCATGT	30.51
NC_070585.1	RVD2	RVD2	13.31	17.2	17877055	17877096	10	T AAACATGATTGAATAT	T ACAGCTATTTTAAGAT	30.51
NC_070581.1	RVD2	RVD2	16.54	13.97	35085162	35085205	12	T ATATATATATAAATAT	T GAAGACATATTACTAT	30.51
NC_070600.1	RVD2	RVD2	12.99	17.52	20982348	20982394	15	T AGAAAACTTTGACTAC	T AAACAAATCTGAACAT	30.51
NC_070598.1	RVD1	RVD2	15.12	15.39	13292905	13292954	17	T TCTGCCCCTCTAATCCA	T AAATGTATTTCCATAT	30.51
NC_070588.1	RVD2	RVD2	13.85	16.67	4856405	4856458	22	T CCAGAAGTTTAACAAT	T TAAGCTGTTATACTAA	30.52
NC_070597.1	RVD2	RVD2	16.22	14.3	23593895	23593945	19	T CCAGCTGTTAAACTTT	T TAAAATGTATGAATAT	30.52
NC_070582.1	RVD2	RVD2	11.77	18.75	8440326	8440382	25	T GTAGATATCTGACTAT	T AAAAAGCTATAAATCT	30.52
NC_070582.1	RVD2	RVD2	15.25	15.27	235486	235539	22	T GGAAGTGTTCAACAGT	T AACACTGTTTAACACT	30.52
NC_070581.1	RVD2	RVD2	13.48	17.04	14762970	14763012	11	T AAAGGTTTTTAACTTT	T CCAGATAAGAAACTAT	30.52
NC_070594.1	RVD2	RVD2	13.23	17.29	27726784	27726827	12	T TAAACTATTCAACTAT	T CCAAATGATCAATTAT	30.52
NC_070581.1	RVD2	RVD2	12.63	17.89	27545787	27545829	11	T TCAAGTGATTGACTAT	T ACATGTATAACACTAC	30.52
NC_070580.1	RVD2	RVD2	18.01	12.52	15552956	15553000	13	T AAAAATGTTTTAAAGT	T GAAAGTATTTCAGTAT	30.53
NC_070595.1	RVD2	RVD2	13.65	16.88	23553544	23553592	17	T CGAGAAGTCTCACTAT	T ACAATTCTGTGACTAC	30.53
NC_070588.1	RVD2	RVD2	14.27	16.26	11358169	11358224	24	T AAACGTGTTTACTTAT	T GGAAAAATTAGAATAA	30.53
NC_070601.1	RVD2	RVD2	14.46	16.07	10088947	10088997	19	T AAAGGAATTTAAATAA	T ACATGAGTTTAATTAT	30.53
NC_070593.1	RVD2	RVD2	17.3	13.24	13533102	13533150	17	T GCAGATGGTTAACTGC	T ACAAATAGTTCACTAT	30.54
NC_070584.1	RVD2	RVD2	12.01	18.53	16571413	16571469	25	T AGAGTTATTTACCTAT	T TATGACGTTTGATTAT	30.54
NC_070580.1	RVD2	RVD2	13.9	16.64	24038808	24038850	11	T GCAGGTGTTTGACTTA	T AATGAGGTTTAACTAA	30.54
NC_070581.1	RVD2	RVD2	14.87	15.67	28798436	28798477	10	T GTAATACTTTAACTAT	T GAAAGTACATAAGTAT	30.54
NC_070583.1	RVD2	RVD2	13.65	16.89	7151842	7151896	23	T GCAAGTGTATCACCAT	T GGAGGTAATTTAAGAT	30.54
NC_070595.1	RVD2	RVD2	15.19	15.35	14082001	14082053	21	T AAACATGTCAAACCAT	T AGAAACGTTTCCATAT	30.54
NC_070584.1	RVD2	RVD2	9.96	20.58	20490071	20490120	18	T GAAAATGTTTGACTCT	T ATCATCATTTAAACAT	30.54
NC_070579.1	RVD2	RVD2	12.53	18.02	19084968	19085023	24	T AAAAAAATCTAACTAT	T TTAAATGACTAACAAT	30.55
NC_070591.1	RVD2	RVD2	11.84	18.71	10477106	10477158	21	T GCAACTGTTAAACTAT	T AAAACCACTGAAATAT	30.55
NC_070580.1	RVD2	RVD2	14.86	15.69	6592811	6592856	14	T AAAAATAAATAAATAT	T AAAAATTTCTGACTTT	30.55
NC_070589.1	RVD2	RVD2	15.52	15.03	34206306	34206347	10	T ATGATTGTTTAACTAT	T AAATGACTTTAACTAC	30.55
NC_070595.1	RVD2	RVD2	16.38	14.17	17292462	17292509	16	T AAAAATGCATAACTCC	T AAATGTATTAAACTAA	30.55
NC_070584.1	RVD2	RVD2	14.94	15.61	34398967	34399013	15	T ACAACATTTTCACTAT	T GTAGATGTTTAGATAT	30.55
NC_070594.1	RVD2	RVD2	17.53	13.03	16137149	16137196	16	T TGATGTCTTCCACCAT	T CAAAATGATTTACTAT	30.56
NC_070593.1	RVD2	RVD2	16.42	14.14	16952739	16952780	10	T CAACCAATTTGTCTAT	T GGGCATTTTTGACTAT	30.56
NC_070578.1	RVD2	RVD2	15.17	15.39	9326307	9326356	18	T GTAAACATTTAACGAT	T AAACATAAAAAACTAT	30.56
NC_070587.1	RVD2	RVD2	17.39	13.17	8830822	8830873	20	T TAACATTTATAAATAT	T GAAAATGATTGATTAT	30.56
NC_070582.1	RVD2	RVD2	17.28	13.28	21164893	21164934	10	T AAAAATCTGTCACACT	T GATGGTTTTTAACTAT	30.56
NC_070590.1	RVD2	RVD2	14.5	16.06	3019561	3019610	18	T ATAGATAATTAAATAT	T ATATCTATGTAACTAT	30.56
NC_070601.1	RVD1	RVD2	15.76	14.8	6655972	6656018	14	T TACACTTCTATAGTATC	T AAAGGTTTGTTACTAT	30.56
NC_070583.1	RVD2	RVD2	17.77	12.79	24888051	24888104	22	T GGAAATATTCGGAAAT	T GGAAACCTCTGACTAT	30.56
NC_070584.1	RVD2	RVD2	13.35	17.22	12705100	12705144	13	T AAACTTATTTGAATAT	T GAATGCATTAAATTAT	30.57
NC_070585.1	RVD2	RVD2	15.42	15.15	7877926	7877974	17	T GTAAACATTTAATTAT	T GAACGCATTTGCATAT	30.57
NC_070596.1	RVD2	RVD2	14.1	16.47	22662105	22662148	12	T GTAAATGTTTGAAAAT	T GCATGTGTATGCCCAT	30.57
NC_070579.1	RVD2	RVD2	10.62	19.95	16099425	16099476	20	T GGAAGTTTTTCACTAT	T AAAACAATATGATTTT	30.57
NC_070582.1	RVD2	RVD2	11.97	18.6	35381481	35381533	21	T GAAGACATTTTACTAT	T AGATGTGTTTAAATTG	30.57
NC_070582.1	RVD2	RVD2	14.72	15.85	13572271	13572312	10	T GGAGGTGTTACAATAA	T AAAAACAGTTAAATAT	30.57
NC_070588.1	RVD2	RVD2	12.21	18.36	609767	609816	18	T ATAAGTATTTAACTCT	T GAACGGATTTCACCGT	30.57
NC_070601.1	RVD2	RVD2	16.74	13.84	10109927	10109970	12	T ATACATATATATCTAT	T AAAAATGTATATCTAT	30.58
NC_070579.1	RVD2	RVD2	13.85	16.73	31814201	31814250	18	T CAAGCTATATGACTAC	T AAATGTATTTGTTTAT	30.58
NC_070601.1	RVD2	RVD2	14.53	16.05	1202475	1202523	17	T TACAGTATTTAAATAT	T AAAAAAATTAATCTAT	30.58
NC_070596.1	RVD2	RVD2	13.71	16.87	9577370	9577416	15	T CAAAACATTTAAATAT	T GTAAATGCTTCACACT	30.58
NC_070598.1	RVD2	RVD2	16.73	13.85	4571368	4571422	23	T CAAAGTATTTAAGCAA	T AAAGCTGACTCACTAT	30.58
NC_070594.1	RVD2	RVD2	15.23	15.35	4603369	4603422	22	T ATAAATATTACACAAT	T AGACATTTTTAAACAT	30.58
NC_070600.1	RVD2	RVD2	15.91	14.67	10957987	10958032	14	T AAAAATATTTTAGAAT	T AGACGTGTTTGCCACT	30.58
NC_070589.1	RVD2	RVD2	13.84	16.75	2649893	2649946	22	T AGAAACATTTATCTAT	T GCACTAATTCCACTAT	30.59
NC_070585.1	RVD2	RVD2	11.84	18.75	11335081	11335126	14	T GCAAATGTTTCACAAT	T CAACGCGTTTCCCCAC	30.59
NC_070581.1	RVD2	RVD2	17.89	12.7	25881401	25881453	21	T CCATACACTTGACAAT	T CAAAATGTTTAACTGT	30.59
NC_070595.1	RVD2	RVD2	15.72	14.87	15190662	15190707	14	T AAAACTAATCAAATAT	T ATAGATTTTTCACAAT	30.59
NC_070586.1	RVD2	RVD2	14.3	16.29	7076212	7076253	10	T GGACAGATTTAAATAT	T GGAGGTATTTGTTTAA	30.59
NC_070594.1	RVD2	RVD2	14.78	15.81	7454870	7454923	22	T GGAGATATTTGAGTTT	T GCACTTGTTAGAATAT	30.59
NC_070599.1	RVD2	RVD2	14.9	15.69	2151302	2151343	10	T CAAAATATCTATCTAT	T AGATATATCTATCTAT	30.59
NC_070589.1	RVD2	RVD2	15.69	14.9	2340654	2340695	10	T AGATATATCTATCTAT	T CAAAATATCTATCTAT	30.59
NC_070584.1	RVD2	RVD2	16.54	14.06	24366886	24366927	10	T AAACATTCTTGACTTT	T GGAGGTATATAAATAA	30.6
NC_070586.1	RVD2	RVD2	18.68	11.93	7249069	7249119	19	T AACCACATATAATTAT	T GGAAATATTAGACTAA	30.61
NC_070592.1	RVD2	RVD2	18.11	12.5	23084840	23084892	21	T GAACATTTATTATTAT	T GCAGCTGTTACACTAT	30.61
NC_070586.1	RVD2	RVD2	18.68	11.93	7255843	7255893	19	T AACCACATATAATTAT	T GGAAATATTAGACTAA	30.61
NC_070587.1	RVD2	RVD2	20.02	10.59	7522533	7522574	10	T ATAAATGAAATACAAT	T GCAGGTATTTGACCAT	30.61
NC_070586.1	RVD2	RVD2	11.57	19.04	12980361	12980415	23	T GAAGTTGTTTGACTAA	T TAAAGACTCAAACTAA	30.61
NC_070589.1	RVD2	RVD2	13.06	17.55	22990684	22990730	15	T TTAAATATTTCACTAT	T AAAAATGTCCCAATCT	30.61
NC_070588.1	RVD2	RVD2	16.21	14.41	26861141	26861196	24	T GCATACATTTCAATAT	T CATACTGTTTCACTAT	30.62
NC_070585.1	RVD2	RVD2	17.93	12.69	32796247	32796299	21	T AAATCTGTCTCACACT	T AAATATATTTAAATAT	30.62
NC_070583.1	RVD1	RVD2	15.92	14.7	29097324	29097375	19	T CAAACTTTTATAATCCA	T AAAAATATTATAATAT	30.62
NC_070583.1	RVD2	RVD2	11.97	18.65	31357285	31357336	20	T GGAAATATTATACTAT	T AAAAGTATTAAAAGAG	30.62
NC_070601.1	RVD2	RVD2	17.11	13.51	8290341	8290396	24	T CACTTTATTCAACTAT	T AAACATATTTGAATAA	30.62
NC_070585.1	RVD2	RVD2	14.87	15.76	16271083	16271131	17	T GGCAACGTTTCACTCT	T CCACAACTTTGACAAT	30.63
NC_070585.1	RVD2	RVD2	14.87	15.76	16284653	16284701	17	T GGCAACGTTTCACTCT	T CCACAACTTTGACAAT	30.63
NC_070585.1	RVD2	RVD2	14.87	15.76	16278146	16278194	17	T GGCAACGTTTCACTCT	T CCACAACTTTGACAAT	30.63
NC_070585.1	RVD2	RVD2	14.87	15.76	16319484	16319532	17	T GGCAACGTTTCACTCT	T CCACAACTTTGACAAT	30.63
NC_070585.1	RVD2	RVD2	14.87	15.76	16297547	16297595	17	T GGCAACGTTTCACTCT	T CCACAACTTTGACAAT	30.63
NC_070585.1	RVD2	RVD2	14.87	15.76	16300613	16300661	17	T GGCAACGTTTCACTCT	T CCACAACTTTGACAAT	30.63
NC_070585.1	RVD2	RVD2	14.87	15.76	16293818	16293866	17	T GGCAACGTTTCACTCT	T CCACAACTTTGACAAT	30.63
NC_070585.1	RVD2	RVD2	14.87	15.76	16264208	16264256	17	T GGCAACGTTTCACTCT	T CCACAACTTTGACAAT	30.63
NC_070585.1	RVD2	RVD2	14.87	15.76	16304118	16304166	17	T GGCAACGTTTCACTCT	T CCACAACTTTGACAAT	30.63
NC_070580.1	RVD2	RVD2	18.87	11.77	2206888	2206943	24	T GCAAGTATATAGATCT	T TGAAATGTCTGACTAT	30.64
NC_070582.1	RVD2	RVD2	11.77	18.87	807955	808010	24	T TGAAATGTCTGACTAT	T GCAAGTATATAGATCT	30.64
NC_070581.1	RVD2	RVD2	16.18	14.46	11421024	11421080	25	T TGAACTGTTTTACTGT	T GAAGATAAATAAATAT	30.64
NC_070599.1	RVD2	RVD2	11.77	18.87	1026772	1026827	24	T TGAAATGTCTGACTAT	T GCAAGTATATAGATCT	30.64
NC_070579.1	RVD2	RVD2	18.87	11.77	41159161	41159216	24	T GCAAGTATATAGATCT	T TGAAATGTCTGACTAT	30.64
NC_070582.1	RVD2	RVD2	11.77	18.87	36329137	36329192	24	T TGAAATGTCTGACTAT	T GCAAGTATATAGATCT	30.64
NC_070597.1	RVD2	RVD2	18.87	11.77	1140382	1140437	24	T GCAAGTATATAGATCT	T TGAAATGTCTGACTAT	30.64
NC_070594.1	RVD2	RVD2	11.77	18.87	31263340	31263395	24	T TGAAATGTCTGACTAT	T GCAAGTATATAGATCT	30.64
NC_070582.1	RVD2	RVD2	17.49	13.15	30027949	30027991	11	T AAAAGTGTATACAGAT	T GCAGTTATTTAAATAT	30.64
NC_070586.1	RVD2	RVD2	17.23	13.41	10101046	10101092	15	T GACAACCTTTAACAAA	T AAAAATGTTTTATTAT	30.64
NC_070586.1	RVD2	RVD2	18.87	11.77	2373584	2373639	24	T GCAAGTATATAGATCT	T TGAAATGTCTGACTAT	30.64
NC_070598.1	RVD2	RVD2	11.77	18.87	27714505	27714560	24	T TGAAATGTCTGACTAT	T GCAAGTATATAGATCT	30.64
NC_070583.1	RVD2	RVD1	14.92	15.72	27430495	27430548	21	T GGAAGACTTTGAATAA	T TCTAATTCTACAGTACA	30.64
NC_070598.1	RVD2	RVD2	18.87	11.77	27633934	27633989	24	T GCAAGTATATAGATCT	T TGAAATGTCTGACTAT	30.64
NC_070583.1	RVD2	RVD2	18.87	11.77	88878	88933	24	T GCAAGTATATAGATCT	T TGAAATGTCTGACTAT	30.64
NC_070579.1	RVD2	RVD2	15.81	14.83	22546425	22546480	24	T GTAGAAATTAGACTCT	T ACATGTACATGACTAT	30.64
NC_070589.1	RVD2	RVD2	16.54	14.1	8833911	8833959	17	T GAAACTATCTTTCTAT	T GCAGATGATTGGCTAT	30.64
NC_070599.1	RVD2	RVD2	11.77	18.87	3304688	3304743	24	T TGAAATGTCTGACTAT	T GCAAGTATATAGATCT	30.64
NC_070595.1	RVD2	RVD2	18.87	11.77	4572911	4572966	24	T GCAAGTATATAGATCT	T TGAAATGTCTGACTAT	30.64
NC_070594.1	RVD2	RVD2	18.87	11.77	30205012	30205067	24	T GCAAGTATATAGATCT	T TGAAATGTCTGACTAT	30.64
NC_070584.1	RVD2	RVD2	14.17	16.48	29581089	29581145	25	T AGACATCATTGAATAT	T GACAGTATTGGGCTAT	30.65
NC_070592.1	RVD2	RVD2	17.69	12.96	6433327	6433376	18	T TCAACTGTCAGACTAA	T GTAAATGTTGAACTAT	30.65
NC_070595.1	RVD2	RVD2	15.07	15.58	10737354	10737397	12	T GTAAATATATCACTCT	T AGAAATATTAAATCAT	30.65
NC_070582.1	RVD2	RVD2	16.88	13.77	26376776	26376823	16	T GCACAGATTTTACAAT	T GGATATGTTCAACTAA	30.65
NC_070581.1	RVD2	RVD2	13.81	16.84	6596205	6596248	12	T TTAGATGTTTAACTAA	T TGAAGTACTTCACAAC	30.65
NC_070597.1	RVD2	RVD1	17.42	13.24	9317265	9317309	12	T GGATGTGATTGCCCAA	T TCCTGTTCTCTAGTCCA	30.66
NC_070583.1	RVD2	RVD2	20.62	10.04	26892260	26892310	19	T TGATAAGTAGGACTAC	T AAACATGTTTCACTAT	30.66
NC_070590.1	RVD2	RVD2	16.61	14.05	6783806	6783861	24	T ACACATATTTAAATCA	T AGACAAATTTCACCAT	30.66
NC_070601.1	RVD2	RVD2	11.84	18.82	16779891	16779947	25	T GCACATATTCGACTAT	T GAAGGAGTACTATTAT	30.66
NC_070578.1	RVD2	RVD2	15.69	14.97	39672310	39672358	17	T TAAAATGTTAATCTAT	T AAAAGGTCTTGACTAT	30.66
NC_070578.1	RVD2	RVD2	12.45	18.21	8333450	8333505	24	T AAAAGCATTTGAATAT	T CCAGGAATTAAAATCT	30.66
NC_070590.1	RVD2	RVD2	11.53	19.13	5959204	5959253	18	T GGAGGCATTTGACTAC	T AGATTGGTTTAAATAC	30.66
NC_070600.1	RVD2	RVD2	18.37	12.29	21465955	21465998	12	T TGGAGTTTTTGATTAT	T GGAAATGTTTACATAT	30.66
NC_070587.1	RVD2	RVD1	18.57	12.1	23770113	23770164	19	T ACAGATAATTTAGTAA	T TCCCATTCTCTACTCCA	30.67
NC_070586.1	RVD2	RVD2	19.3	11.37	11204152	11204203	20	T CCAGCTCTAAAAGTAT	T AAAAATGTTTGATTAT	30.67
NC_070584.1	RVD2	RVD2	14.7	15.97	34894717	34894768	20	T ATAAAAATTTAAATAT	T GGAAATATATATATAT	30.67
NC_070589.1	RVD2	RVD2	18.04	12.63	34501963	34502010	16	T AAAGCTGCTCGATCAT	T TCAGGAGTTTAACTAT	30.67
NC_070600.1	RVD2	RVD2	17.06	13.61	17361133	17361174	10	T AGCCATATTTAGATAT	T GGATGTATTTGACTCA	30.67
NC_070590.1	RVD2	RVD2	14.46	16.21	10826672	10826726	23	T GAAAACATTTGAAAAT	T GAAACTTTTTCAATAA	30.67
NC_070592.1	RVD2	RVD2	16.9	13.77	26949575	26949630	24	T AAAAATATACACATAT	T GGAGATTTATAACCAT	30.67
NC_070579.1	RVD2	RVD2	15.03	15.65	18027874	18027927	22	T CAATATATCTGACTAA	T GAAAGAAATTAACTTT	30.68
NC_070595.1	RVD2	RVD2	16.31	14.37	16049893	16049942	18	T GAAGATATTGCAATAA	T GACAACATTTAACCAT	30.68
NC_070583.1	RVD2	RVD2	13.65	17.03	36669214	36669264	19	T GAAGCTCTTTGACCAC	T GAAAAACTTTAAATGT	30.68
NC_070580.1	RVD2	RVD2	16.71	13.97	21958492	21958538	15	T GAACAAATATAACTTT	T GAAATTGTTTAACAAA	30.68
NC_070597.1	RVD2	RVD2	16.31	14.37	12017400	12017455	24	T CAAAGGATTTGAATAC	T AACAATGCTAAACTAT	30.68
NC_070599.1	RVD2	RVD2	17.22	13.46	12937768	12937811	12	T GGATATATTTAATCAA	T GGAAGTATTAAAGTAT	30.68
NC_070585.1	RVD2	RVD2	12.99	17.69	23143796	23143844	17	T GCAAATGATTAACAAT	T AAATGAATTAAACTGT	30.68
NC_070582.1	RVD2	RVD2	15.12	15.56	13712036	13712087	20	T GCAAGCATCTGAATAT	T GAAGGGGTTGGACTCT	30.68
NC_070593.1	RVD2	RVD2	16.54	14.14	22023603	22023654	20	T AAAAACATCAAACAAT	T GCAGGTTTTTATCTAT	30.68
NC_070584.1	RVD2	RVD2	17.69	12.99	7124074	7124116	11	T AAATATATCTGGCTAA	T GCAAACGCTTAACTAT	30.68
NC_070585.1	RVD2	RVD2	16.14	14.54	26902015	26902065	19	T GGGCTTGCTTAACTAT	T AAAAATATACAACAAT	30.68
NC_070579.1	RVD2	RVD2	17.6	13.08	21541320	21541367	16	T CAAAATCATTTACTGT	T ACAACTGTTTGATTAT	30.68
NC_070581.1	RVD2	RVD2	12.37	18.31	34159526	34159571	14	T AAATATATTTAACTAA	T GGAAGAATTACACATT	30.68
NC_070589.1	RVD2	RVD2	15.45	15.23	30599869	30599911	11	T AGAAATGTGTAAAAAT	T AAAAGTATTCCACTCA	30.68
NC_070601.1	RVD2	RVD2	14.74	15.94	1437585	1437636	20	T CCAGCTTATTAACTAT	T GGAGGACTTTTACTTT	30.68
NC_070586.1	RVD2	RVD2	12.79	17.9	30194559	30194608	18	T GCAAATGTAAGACTAT	T AGAACTCTGCCACTAC	30.69
NC_070589.1	RVD2	RVD2	13.68	17.01	34278931	34278972	10	T ATGAATGTTTAACTAT	T AAATGGTTTTAACTAC	30.69
NC_070591.1	RVD2	RVD2	12.18	18.51	19362744	19362794	19	T CAAAATGTTGAACTAT	T GTATGTTTTTCACAAA	30.69
NC_070581.1	RVD2	RVD2	15.82	14.87	30769117	30769161	13	T CGAATAATTTGACGAT	T TGACATTTTTAACCAT	30.69
NC_070583.1	RVD1	RVD2	15	15.69	19550805	19550862	25	T TCCAGTTATTTGGTCCA	T GGACTTCTTTAACAAC	30.69
NC_070590.1	RVD2	RVD2	13.26	17.43	17818969	17819012	12	T AAAACTATTTTACTCT	T GAAAATATTGCATTAA	30.69
NC_070588.1	RVD2	RVD1	14.93	15.76	10686868	10686913	13	T GAAAGTAGTTGACAAA	T TGCACTTCTAAGCTGCA	30.69
NC_070587.1	RVD2	RVD2	15.17	15.52	9725985	9726032	16	T TGAAACAGTTAACTAT	T GTAAATATTTTACTTT	30.69
NC_070593.1	RVD2	RVD2	14.17	16.53	14876637	14876685	17	T GAAAGCATTTACCTAC	T AAAACTGTCTGAGTAC	30.7
NC_070599.1	RVD2	RVD2	14.83	15.87	24880790	24880833	12	T GGAATACTTTAACTAC	T AAAAGTACCTAAGTAT	30.7
NC_070584.1	RVD1	RVD2	16.08	14.62	2507173	2507220	15	T AACACCTCCATCCTCCA	T GGAGGTGTTATATTAT	30.7
NC_070588.1	RVD2	RVD2	19.13	11.57	7570026	7570081	24	T GGAATAAGTTTAATAT	T GTAAGTGTTTGACCAT	30.7
NC_070589.1	RVD2	RVD2	15.04	15.67	12408551	12408599	17	T ACAAGTATTGCACAAT	T GAAAATGCTCAAGTAT	30.71
NC_070590.1	RVD2	RVD2	16.54	14.17	27730709	27730759	19	T GAAAATCTTTTACTTA	T CCAAATGATTGAATAT	30.71
NC_070578.1	RVD2	RVD2	17.34	13.37	35719660	35719702	11	T ACATGTATTTGACTGG	T GATGGTGTTTGAATAT	30.71
NC_070582.1	RVD2	RVD2	12.17	18.54	8820537	8820581	13	T AAAGAAATTTGACTCT	T ATAAATGATCAAATCT	30.71
NC_070592.1	RVD2	RVD2	19.6	11.11	15477056	15477109	22	T GAAGCGATTTCATTTT	T GAAGCTGTTTAAATAT	30.71
NC_070580.1	RVD2	RVD2	20.26	10.45	22911096	22911146	19	T AAAAACTTCTTACTCA	T AGAAATATTTGAATAT	30.71
NC_070593.1	RVD2	RVD2	15.12	15.59	22466078	22466134	25	T GGCAGTGTTTTACTTT	T GCAGGTGATGAACCAT	30.71
NC_070578.1	RVD2	RVD2	16.21	14.5	5265774	5265819	14	T GCATATCTTTAAATAC	T GAAGATCATTAACTTT	30.71
NC_070578.1	RVD2	RVD2	13.64	17.08	30492742	30492795	22	T AGAAATGTATAACTGT	T ACAATTCTTAAACTAG	30.72
NC_070599.1	RVD1	RVD2	13.84	16.88	15871608	15871657	17	T TCCACCCCTAAAGCCCA	T GGCACTATTGCACAAT	30.72
NC_070593.1	RVD2	RVD2	16.22	14.5	27866426	27866482	25	T TAAAACTATTAACTAT	T ACAAATGTTTGTCCAT	30.72
NC_070596.1	RVD2	RVD2	12.83	17.89	22026072	22026115	12	T GTAGATATATCACTAT	T TGATATTTCTACCTAT	30.72
NC_070595.1	RVD2	RVD1	18.09	12.63	23247875	23247925	18	T AAATAACTTACACTAC	T ACCACCTCTAGGGTCCA	30.72
NC_070578.1	RVD2	RVD2	14.63	16.1	7539512	7539559	16	T GAACTTGATCGACTAT	T GGATATGCTCAAATAT	30.73
NC_070594.1	RVD2	RVD2	13.86	16.87	7585575	7585616	10	T AAAAGTATATAAGTAT	T GTAATACTTTAACTAC	30.73
NC_070594.1	RVD2	RVD2	13.86	16.87	7585657	7585698	10	T AAAAGTATATAAGTAT	T GTAATACTTTAACTAC	30.73
NC_070595.1	RVD2	RVD2	13.15	17.58	21811258	21811299	10	T GCAAGTATTTTAATAT	T GTGAATGTTTCATTAT	30.73
NC_070595.1	RVD2	RVD2	13.86	16.87	26622601	26622642	10	T AAAAGTATATAAGTAT	T GTAATACTTTAACTAC	30.73
NC_070601.1	RVD2	RVD2	18.48	12.25	15164296	15164339	12	T GTAAATGTGTATCTAC	T AGAAATGTTTGAATAA	30.73
NC_070588.1	RVD2	RVD2	17.13	13.61	2775116	2775171	24	T GTTGTAATTTGACTAT	T AAAGATATTTACTTAT	30.74
NC_070591.1	RVD2	RVD2	15.32	15.42	2519149	2519199	19	T AAAAGTGAATCAATAT	T AAAAATGTTTCATGAT	30.74
NC_070598.1	RVD2	RVD2	15.05	15.69	12960735	12960778	12	T GGAATTTTTTAATTAT	T AGATATATATATCTAT	30.74
NC_070591.1	RVD2	RVD2	15.42	15.32	2481857	2481907	19	T AAAAATGTTTCATGAT	T AAAAGTGAATCAATAT	30.74
NC_070600.1	RVD2	RVD2	12.83	17.91	25348433	25348488	24	T GAAGATGTTTCACTCA	T AGACGTTATTTATTAT	30.74
NC_070589.1	RVD2	RVD2	11.86	18.88	19881485	19881528	12	T AAAAATGTTTAAGTAT	T TGAACAATATTACTAC	30.74
NC_070599.1	RVD2	RVD2	14.08	16.66	27811529	27811576	16	T ACAACTTTATAACTAT	T AAAAATAAATGAATAA	30.74
NC_070600.1	RVD2	RVD2	15.52	15.22	22540839	22540883	13	T AAACATGTTAAAACAT	T AAAGGATTTTAATTAT	30.74
NC_070591.1	RVD2	RVD2	15.32	15.42	2493087	2493137	19	T AAAAGTGAATCAATAT	T AAAAATGTTTCATGAT	30.74
NC_070591.1	RVD2	RVD2	15.42	15.32	2424630	2424680	19	T AAAAATGTTTCATGAT	T AAAAGTGAATCAATAT	30.74
NC_070580.1	RVD2	RVD2	17.92	12.83	9380374	9380426	21	T CGAAATATTTCCATTT	T GAAATTGTATCACTAT	30.75
NC_070582.1	RVD2	RVD2	19.96	10.79	8300543	8300595	21	T TTGGGGTTTTGACTAT	T GAAGATGTTCCACTAT	30.75
NC_070585.1	RVD2	RVD2	14.7	16.05	29563938	29563989	20	T ATCTCTGTTTGACTAT	T GAATATTTTTAACTCA	30.75
NC_070580.1	RVD2	RVD2	16.25	14.5	32307580	32307631	20	T CAACAAATTCAACTAA	T ACAAATGTATGGCTAT	30.75
NC_070599.1	RVD2	RVD2	17.56	13.19	27308022	27308078	25	T ATAACAATATAAATAT	T AAAAATGTTACACCAT	30.75
NC_070589.1	RVD2	RVD2	14.66	16.09	6583989	6584040	20	T AAAAATGTTCAAAAAT	T ACACTAACTTAACTAT	30.75
NC_070579.1	RVD2	RVD2	13.23	17.52	39561707	39561762	24	T AAACATGTTAAACTCT	T GCAAAAATTAAAATAA	30.75
NC_070582.1	RVD2	RVD2	15.33	15.42	29678585	29678639	23	T AAAAGTATTGAACAAA	T AAAAATGTTTTATTAC	30.75
NC_070580.1	RVD2	RVD2	18.01	12.74	26416093	26416144	20	T AGAAGTATTCAGATCT	T GCATATCTTTCACTAT	30.75
NC_070594.1	RVD2	RVD2	12.45	18.31	23455828	23455871	12	T GAAGATATTTAAAAAT	T GAAAGTAATTCAAAAG	30.76
NC_070597.1	RVD2	RVD2	14.57	16.19	19398578	19398628	19	T CAAAATCTTTAAAAAT	T AAACAGATTAGACAAT	30.76
NC_070583.1	RVD2	RVD2	16.22	14.54	32665335	32665377	11	T TAAAACTATTAACTAT	T ACCAATGTTTGACTTT	30.76
NC_070578.1	RVD2	RVD2	15.69	15.07	22370466	22370513	16	T GAAAATATTTTACATT	T AGCATTATTTCACTAC	30.76
NC_070594.1	RVD2	RVD2	17.65	13.11	8749153	8749195	11	T AAAAATAAATGAATAG	T GCAAGTGTTTAAAAAT	30.76
NC_070590.1	RVD2	RVD2	11.68	19.08	17280850	17280900	19	T ACAGCTGTTTGACTCT	T AAAAGTCATGCACTCA	30.76
NC_070595.1	RVD2	RVD2	17.93	12.83	10719016	10719068	21	T AGCTCCACTTCACTAT	T TGAGATATTTCACTAA	30.76
NC_070580.1	RVD2	RVD2	13.39	17.37	27452791	27452838	16	T AAAAATATTTCACAAA	T AAAATGATATAACAAT	30.76
NC_070585.1	RVD2	RVD2	14.1	16.66	21692900	21692950	19	T GGAGATTTTTAAAAAT	T AAAAATAAATGAATAA	30.76
NC_070581.1	RVD2	RVD2	13.11	17.65	520582	520625	12	T GGAAATCTTTGAAAAT	T AATAGTGACAAACTAT	30.76
NC_070598.1	RVD1	RVD2	15.72	15.05	15932472	15932524	20	T CCCACTCCTATTTCCCA	T GAATATTTTTGATTAT	30.77
NC_070587.1	RVD2	RVD1	16.36	14.41	2058380	2058427	15	T GAATATGTTTCAGTAA	T CCCCCTTCTTTAACCCA	30.77
NC_070584.1	RVD2	RVD2	17.58	13.19	5439926	5439967	10	T AAAAGAAAATAATTAT	T GAAAATATATCACAAT	30.77
NC_070578.1	RVD2	RVD2	16.47	14.3	14156110	14156159	18	T CAAAATGTTTAATTCA	T AAAAGTGTTTTAATAA	30.77
NC_070593.1	RVD2	RVD2	18.56	12.21	30227213	30227262	18	T AAACGGATTTCACCGT	T ATAAGTATTTAACTCT	30.77
NC_070592.1	RVD2	RVD2	16.11	14.66	12306960	12307014	23	T TCATGTATTTAATTAT	T AAAAATGTTTAAAAAC	30.77
NC_070588.1	RVD2	RVD2	14.46	16.31	2942309	2942363	23	T AGAAATGCTTAAAAAT	T TTACATATTTAATTAT	30.77
NC_070594.1	RVD2	RVD2	13.77	17	19028370	19028415	14	T AGGGATATTTGAATAT	T GCAGAAACATAACAAT	30.77
NC_070592.1	RVD1	RVD2	14.26	16.51	10412360	10412406	14	T ACCCCTTATATGATCTA	T AAACACGTTTGACCTT	30.77
NC_070586.1	RVD2	RVD2	16.87	13.9	14509537	14509588	20	T GAACATTTCTGACTCA	T GGAAGTGTTTTAATAA	30.77
NC_070596.1	RVD2	RVD2	17.22	13.55	30023840	30023895	24	T GAATATGTTTAATAAA	T AAACATTTTTAAATAT	30.77
NC_070599.1	RVD2	RVD2	18.56	12.21	2678753	2678802	18	T AAACGGATTTCACCGT	T ATAAGTATTTAACTCT	30.77
NC_070600.1	RVD2	RVD2	14.08	16.7	20401161	20401202	10	T ACAATACTTTAACTAT	T TAAAGTATGTAAGTAT	30.78
NC_070590.1	RVD1	RVD2	15.89	14.89	11651846	11651896	18	T TGCACCTCTAAAATACA	T AAAAATATTCACATAT	30.78
NC_070597.1	RVD2	RVD2	16.53	14.25	22186929	22186973	13	T TGAAATAATTACATAT	T AAACATAATTCACCAT	30.78
NC_070597.1	RVD1	RVD2	14.44	16.34	7801889	7801945	24	T TCTGCTTTTATGATCAA	T AAAGTTCTGTAAATAT	30.78
NC_070581.1	RVD2	RVD2	13.57	17.21	11603556	11603605	18	T AAAAATGTTTAATTAA	T TAAAATAGTTGCCAAT	30.78
NC_070600.1	RVD2	RVD2	14.08	16.7	20401041	20401082	10	T ACAATACTTTAACTAT	T TAAAGTATGTAAGTAT	30.78
NC_070580.1	RVD2	RVD2	11.22	19.56	22970524	22970568	13	T AAACATATTTTACTAT	T AACACAGCTTAAAAAT	30.78
NC_070599.1	RVD2	RVD2	10.33	20.46	12186841	12186888	16	T AAAAGTATTAAACTAT	T AAAACTTTTGAATTAG	30.79
NC_070584.1	RVD2	RVD2	15.27	15.52	28725409	28725456	16	T ACAATTAATTAACTCT	T AGAAATACTTCAATAA	30.79
NC_070582.1	RVD2	RVD2	12.83	17.96	9244828	9244880	21	T ACAAGTGATTTACTAT	T TAAAGTGTGTAACAAG	30.79
NC_070584.1	RVD2	RVD2	12.49	18.3	16868828	16868876	17	T GAAAATATTTTAATAT	T AGAAATGTAATAAAAT	30.79
NC_070578.1	RVD2	RVD2	17.56	13.23	30315737	30315792	24	T CAAAATGTTGTAGTAT	T AAAACTATTTGACTCA	30.79
NC_070581.1	RVD2	RVD2	12.91	17.89	12580075	12580131	25	T GGAACAGTTTGAATAT	T AAAAACTTTAAACTTT	30.8
NC_070582.1	RVD2	RVD2	13.41	17.39	5826819	5826868	18	T AGAATTATTTAATTAT	T AAATCTATTTTAACAT	30.8
NC_070589.1	RVD2	RVD2	18.31	12.49	17356043	17356092	18	T GAAACTGATCGTCAAT	T TAAAGTATTTAAATAT	30.8
NC_070584.1	RVD2	RVD2	15.81	14.99	7099296	7099344	17	T TAAGGTGATTACCAAT	T ACAAATGTCAGACTAC	30.8
NC_070586.1	RVD2	RVD2	15.77	15.03	40201125	40201172	16	T GGAGATATTTATACAT	T GACACCATTTGACAAT	30.8
NC_070587.1	RVD2	RVD1	16.32	14.48	10342086	10342131	13	T ACAAACCTTTACCTCT	T TACACTTATACGAACCA	30.8
NC_070582.1	RVD2	RVD2	12.83	17.98	10095209	10095257	17	T GAAGGCATTTCACTCT	T TAAAGAATTAGACAAA	30.81
NC_070587.1	RVD2	RVD2	14.5	16.31	32288629	32288685	25	T AATCGTGATTAACTAT	T AGGGCTGTCAAACTAT	30.81
NC_070578.1	RVD2	RVD2	13.03	17.78	19993920	19993963	12	T GACCATACTTGACTAT	T GAATGAAAAAGACTAT	30.81
NC_070582.1	RVD2	RVD2	14.63	16.18	31069018	31069071	22	T CAAAATATCTAATTAT	T AACAGAATTTGACAAC	30.81
NC_070592.1	RVD2	RVD2	14.67	16.14	5876355	5876402	16	T GGACATTTTTTACAAT	T GCATGTAGTTAAATAT	30.81
NC_070597.1	RVD2	RVD2	19.24	11.57	18028478	18028521	12	T AAAACATTACAACTAA	T GGAAGTGTTTTACAAT	30.81
NC_070601.1	RVD2	RVD2	19.04	11.77	17117672	17117720	17	T CAAGTAAAATAACAAT	T GGATATGTATAACTAT	30.81
NC_070580.1	RVD2	RVD2	15.88	14.94	18429051	18429104	22	T AACAATATTTGTCTAA	T CACCATGTTCCACTAT	30.82
NC_070587.1	RVD2	RVD2	15.79	15.03	20671157	20671198	10	T GGAAGGACTACACTAT	T ATAAATGTATCACAAT	30.82
NC_070582.1	RVD2	RVD1	18.05	12.77	20105995	20106043	16	T GAAGGTGAGTGGCTAC	T TCCCCTCCTCTAGTCCC	30.82
NC_070600.1	RVD1	RVD2	15.99	14.83	12338498	12338555	25	T TAAACTTCTTTGACCCA	T ACCAGTGCATGACTAT	30.82
NC_070579.1	RVD2	RVD2	18.4	12.43	17044367	17044422	24	T TAATACCTTTGAGTAT	T GCAAATATTTAATTAT	30.83
NC_070578.1	RVD2	RVD2	16.33	14.5	39623838	39623884	15	T GGAAATATTTTAAACT	T AAAGATGTTTCACATT	30.83
NC_070583.1	RVD2	RVD2	18.34	12.49	24580232	24580275	12	T TAAAATGTTCTAACAT	T AAATATGTTTAAATAT	30.83
NC_070580.1	RVD2	RVD2	12.45	18.38	28604378	28604427	18	T GAAAATGTTCAAATAT	T CACTGTGTTAAACTTT	30.83
NC_070596.1	RVD2	RVD2	12.45	18.38	19601250	19601297	16	T GAAAATATTTGAAAAT	T GGCGAAATTTCCCTTT	30.83
NC_070599.1	RVD2	RVD2	13.31	17.52	28652698	28652739	10	T GGAAATCTTTAAATAC	T AAAAATCACAGAATAT	30.83
NC_070583.1	RVD2	RVD2	10.9	19.93	38122652	38122693	10	T AAACCTGTTTCACTAT	T GAAGCGTCTTCATTAT	30.83
NC_070596.1	RVD2	RVD2	12.25	18.58	19180880	19180921	10	T GAAGAAGTTTAAATAT	T TTTAATAATTCACTAT	30.83
NC_070582.1	RVD2	RVD2	14.5	16.34	17928243	17928297	23	T GTATGTGTTTCACTCT	T CTAGATATCTGACTTT	30.84
NC_070590.1	RVD2	RVD2	16.67	14.17	17330051	17330095	13	T TGAAGTTTTACACAAT	T AAAAGTAATTGCCAAT	30.84
NC_070600.1	RVD2	RVD2	15.77	15.07	543802	543847	14	T AGAAGTGATTAAATGT	T GACAATTTATCACTAT	30.84
NC_070578.1	RVD2	RVD2	13.77	17.07	37977975	37978017	11	T GAATGAGTTTAACTAC	T ACCAGCTTTAAACTAT	30.84
NC_070583.1	RVD2	RVD2	14.7	16.14	18253593	18253649	25	T ATAAATATATAAATAT	T GAAGCTTTTTGTCAAT	30.84
NC_070593.1	RVD2	RVD2	14.87	15.97	28629346	28629400	23	T TAATCAGTTTAACTAT	T AGAAATGTTAAAATTT	30.84
NC_070580.1	RVD2	RVD2	17.85	12.99	6613659	6613711	21	T TAAGATTATTGACACT	T GAAAGTCACTAACTAT	30.84
NC_070589.1	RVD2	RVD2	14.5	16.34	2537790	2537835	14	T ATAGATATTTAAATAA	T CGATGTATCTATCTAT	30.84
NC_070587.1	RVD2	RVD2	15.35	15.49	18600941	18600996	24	T TAAACTATTTGAAAAT	T AATGGTATATTACTAT	30.84
NC_070592.1	RVD2	RVD2	14.3	16.54	7883470	7883526	25	T GGAGATCTTTAACTTC	T AAACATGTTTTACTGC	30.84
NC_070587.1	RVD2	RVD2	14.99	15.86	29756033	29756081	17	T GAAGCTTTTTTAATAT	T GGAGGTGTTAAAAAAA	30.85
NC_070595.1	RVD2	RVD2	15.03	15.82	11433260	11433303	12	T GAAAATCTACTACTAT	T TAAAGTGTAATACTAT	30.85
NC_070588.1	RVD2	RVD2	16.64	14.21	26552422	26552473	20	T GGACTAATAAGACTAT	T AAATATTTTTAACAAT	30.85
NC_070581.1	RVD1	RVD2	15.26	15.59	22418830	22418880	18	T TCCACCTCCCTCATCAA	T CACAATATTTGCATAT	30.85
NC_070578.1	RVD2	RVD2	15.03	15.82	34862163	34862213	19	T TCAGATATTCAACAAT	T GAAGATCTTGGACACT	30.85
NC_070596.1	RVD2	RVD2	15.32	15.54	2316012	2316060	17	T GCAAATGTACAAATAT	T ACAGATGTTTGATTTT	30.86
NC_070578.1	RVD2	RVD2	17.16	13.7	14037759	14037809	19	T GCTGCTGTCAAACTAT	T GCAGGGGTTTGAATAT	30.86
NC_070587.1	RVD2	RVD2	12.63	18.23	27378855	27378901	15	T GGCGATCTTTGACTAC	T AAAAATCTCATACTAG	30.86
NC_070601.1	RVD2	RVD1	18.38	12.48	13703002	13703058	24	T ATAAATGTATTCATAT	T TCAGCTTCTATAACACA	30.86
NC_070586.1	RVD2	RVD2	11.53	19.33	25956641	25956695	23	T GAAGGTGTCAGACTAT	T AGAGAGATCTGCATCT	30.86
NC_070579.1	RVD2	RVD2	16.36	14.5	15057384	15057437	22	T CAAGATGTTTTAGTAC	T ATAGATATATAAATAT	30.86
NC_070582.1	RVD2	RVD2	12.63	18.24	36118643	36118692	18	T GGCGCTGTATAACTAT	T AAAGCAATATGATCAT	30.87
NC_070583.1	RVD2	RVD2	10.99	19.88	34670128	34670178	19	T AAAAGTGTTTCACTAC	T GAAACACTTTTACGAG	30.87
NC_070585.1	RVD2	RVD2	11.22	19.65	4462210	4462255	14	T CGCAATATTTAACTAT	T GAATGCATTTTAATTT	30.87
NC_070582.1	RVD2	RVD2	18.24	12.63	36141941	36141990	18	T AAAGCAATATGATCAT	T GGCGCTGTATAACTAT	30.87
NC_070585.1	RVD2	RVD2	16.89	13.98	12671362	12671403	10	T GTAGATGTTGGAAAAT	T GGAAATCGTTAACAAT	30.87
NC_070595.1	RVD2	RVD2	15.49	15.38	604851	604894	12	T GTAAATACTTGACTGT	T AAAAGTATATGATCAT	30.87
NC_070582.1	RVD2	RVD2	14.37	16.5	27348348	27348404	25	T AAAAGTCCTTCAATAT	T ATAAATGTTAAAATAC	30.87
NC_070599.1	RVD2	RVD2	15.68	15.19	8234502	8234552	19	T GAAGATATTAACCTTT	T GAAAAACTAAAACTAT	30.87
NC_070585.1	RVD2	RVD2	14.5	16.37	18905780	18905822	11	T GAAATTATTAAAATAT	T GCAAATCTTTAAAAAC	30.87
NC_070578.1	RVD2	RVD2	11.22	19.66	24180030	24180080	19	T AAATATATTTCACTAT	T GGAAACATAAAGCAAT	30.88
NC_070581.1	RVD2	RVD2	18.91	11.97	13491393	13491435	11	T GACTGTATTACACACT	T AGAAATGTTTTACTAC	30.88
NC_070600.1	RVD2	RVD2	12.65	18.23	6234598	6234641	12	T GAAAATATTTAAACAT	T ATAAATATGACACTAA	30.88
NC_070595.1	RVD2	RVD2	15.85	15.03	7710160	7710203	12	T TGAAGTATTTGCCTCA	T GACCATGTTCAACCAT	30.88
NC_070586.1	RVD2	RVD2	11.02	19.86	14915362	14915409	16	T AGCGATATTTCACTAT	T TAAATTTATAGACAAT	30.88
NC_070593.1	RVD2	RVD2	14.83	16.05	19082746	19082789	12	T AGAAGTGTAACACTCT	T AAATGTTATTACCTAT	30.88
NC_070581.1	RVD2	RVD2	17.03	13.85	12868429	12868484	24	T CAAAGCATTTAGATAT	T GAAACTGTCTCACTAA	30.88
NC_070586.1	RVD2	RVD2	17.57	13.31	15035024	15035077	22	T AAACATCAGTAAATAT	T CAAGATATATGAATAT	30.88
NC_070592.1	RVD2	RVD2	18.09	12.79	15330731	15330780	18	T CAAAACTTTACACTAC	T GAAGCTATATGACCAT	30.88
NC_070601.1	RVD2	RVD2	18.18	12.7	4686358	4686400	11	T GTTGTTCTTAAACTAT	T AAGAGTATTTCACTAT	30.88
NC_070581.1	RVD1	RVD2	16.2	14.68	20841452	20841500	16	T TCCAGGCCTCTGGTCCA	T GAAGGGCTTTCCCTAT	30.88
NC_070597.1	RVD2	RVD2	18.32	12.56	21680983	21681032	18	T AAACCTCATTCAATCT	T GTAAGTGTGTGACTAT	30.88
NC_070597.1	RVD2	RVD2	17.01	13.88	19133215	19133264	18	T GAAATGATTTTACAAT	T CACGCTATTTGACAAT	30.89
NC_070586.1	RVD2	RVD2	14.59	16.3	10026617	10026670	22	T GGAGCAAATTGACCAT	T GGATATATTTAAACAC	30.89
NC_070588.1	RVD2	RVD2	13.85	17.04	13300029	13300080	20	T ACAGATGTTTCACCAA	T GGAAAGTTTTACCTCT	30.89
NC_070597.1	RVD2	RVD2	13.04	17.85	18597418	18597470	21	T GAACATATTGCACTAT	T GTAAGATTTTAACTCA	30.89
NC_070593.1	RVD2	RVD2	9.18	21.71	13421700	13421752	21	T CAAAATATTTGACTAT	T GCCAGTTTGATACCAT	30.89
NC_070588.1	RVD2	RVD2	17.52	13.37	21504044	21504091	16	T GGAATTATTCACCTTT	T AAAGGAATTTAATTAT	30.89
NC_070582.1	RVD2	RVD2	15.21	15.69	7328095	7328136	10	T GACAGAATTTGATTAT	T GCAAATATTTAACTGG	30.9
NC_070598.1	RVD2	RVD2	17.09	13.81	2956865	2956907	11	T TGCAGTATTTTATTAT	T TAAGATGTTTGACTCA	30.9
NC_070600.1	RVD2	RVD2	15.06	15.84	4951682	4951730	17	T CCAAGTCTTTTAATAT	T GCAGCTGTTTGCATCT	30.9
NC_070580.1	RVD2	RVD2	19.66	11.24	11898861	11898902	10	T AACAATATTTGATACA	T GGAGATGTTTAACTTT	30.9
NC_070584.1	RVD2	RVD2	12.72	18.18	5448866	5448922	25	T AAAAGTATTTCAGTAT	T GAAGTACTTTTACTGT	30.9
NC_070598.1	RVD2	RVD2	18.05	12.85	2878114	2878159	14	T TAAAATATTTTTATAT	T AAAAATATTTAAAAAT	30.9
NC_070582.1	RVD2	RVD2	14.53	16.37	6347232	6347285	22	T ATATATATTTAAATAT	T TTATATATTTAAATAT	30.9
NC_070582.1	RVD2	RVD2	20.57	10.33	3034001	3034046	14	T AGCAGTGTTAGCTTGT	T AAAGAAATTTAACTAT	30.9
NC_070581.1	RVD2	RVD2	12.93	17.97	29466580	29466625	14	T GGAAATATTAGACGAT	T GAGAATGATCAAATAT	30.9
NC_070579.1	RVD2	RVD2	16.21	14.7	12515466	12515507	10	T AAATAAGTTCAACTCT	T GCACCTATTAGACTAC	30.91
NC_070587.1	RVD2	RVD2	16.41	14.5	34082166	34082214	17	T CATAATATTTATCTAT	T GTAAACATTTAAATAT	30.91
NC_070582.1	RVD2	RVD2	14.27	16.64	19006832	19006879	16	T AGAATTATTTCATTAT	T TGAGCTGCATAACAAT	30.91
NC_070587.1	RVD2	RVD2	16.41	14.5	33935332	33935380	17	T CATAATATTTATCTAT	T GTAAACATTTAAATAT	30.91
NC_070587.1	RVD2	RVD2	16.41	14.5	33982657	33982705	17	T CATAATATTTATCTAT	T GTAAACATTTAAATAT	30.91
NC_070598.1	RVD2	RVD2	16.21	14.7	2878088	2878141	22	T AAAAATATTTTTATAT	T ATAAATATATAAATAT	30.91

## Sheet: v1a2-KO_variants
NC_070578.1	11096	ACCTAAC	A
NC_070578.1	12224	T	C
NC_070578.1	12231	G	GAAAAAAA
NC_070578.1	46325	A	G
NC_070578.1	48787	A	G
NC_070578.1	49981	A	G
NC_070578.1	49983	A	G
NC_070578.1	50116	A	G
NC_070578.1	50202	T	C
NC_070578.1	66482	G	GTTTTATTTTTAT
NC_070578.1	67101	A	T
NC_070578.1	67399	T	C
NC_070578.1	67567	C	T
NC_070578.1	67635	C	T
NC_070578.1	67640	A	T
NC_070578.1	76087	A	G
NC_070578.1	76633	C	T
NC_070578.1	94459	T	A
NC_070578.1	94525	A	T
NC_070578.1	97864	G	A
NC_070578.1	98217	T	C
NC_070578.1	98283	C	G
NC_070578.1	103051	C	T
NC_070578.1	104329	A	AAAAAAAAC
NC_070578.1	104333	A	G
NC_070578.1	107943	G	A
NC_070578.1	114603	C	A
NC_070578.1	119173	TTCGTCAACGAATA	T
NC_070578.1	121890	A	G
NC_070578.1	132637	G	C
NC_070578.1	132640	TCATCTGTCCACAGCA	T
NC_070578.1	132775	A	G
NC_070578.1	132823	T	C
NC_070578.1	134803	G	A
NC_070578.1	135256	G	A
NC_070578.1	141851	G	A
NC_070578.1	143376	C	T
NC_070578.1	147160	G	A
NC_070578.1	149855	T	A
NC_070578.1	156803	C	A
NC_070578.1	157297	TGTTGCA	T
NC_070578.1	158471	C	T
NC_070578.1	160297	C	A
NC_070578.1	171099	CTTTAGTTTAGT	C
NC_070578.1	172500	G	T
NC_070578.1	174782	A	C
NC_070578.1	177369	A	T
NC_070578.1	185914	C	A
NC_070578.1	189931	CTGA	C
NC_070578.1	191206	G	A
NC_070578.1	191372	C	T
NC_070578.1	195905	G	A
NC_070578.1	197332	C	CTCA
NC_070578.1	197371	A	C
NC_070578.1	218760	A	T
NC_070578.1	225052	G	C
NC_070578.1	231674	C	T
NC_070578.1	237136	T	C
NC_070578.1	239366	G	A
NC_070578.1	239670	T	A
NC_070578.1	240329	T	C
NC_070578.1	241353	T	A
NC_070578.1	242957	A	G
NC_070578.1	252501	G	A
NC_070578.1	254213	C	T
NC_070578.1	254373	G	A
NC_070578.1	256583	C	T
NC_070578.1	258710	A	G
NC_070578.1	260629	C	G
NC_070578.1	267914	G	A
NC_070578.1	276857	A	T
NC_070578.1	282095	A	G
NC_070578.1	282105	A	G
NC_070578.1	298652	T	TGGCGCATGGC
NC_070578.1	302779	G	A
NC_070578.1	305359	T	C
NC_070578.1	311838	C	T
NC_070578.1	312505	GACCCCC	G
NC_070578.1	317577	C	T
NC_070578.1	323715	C	G
NC_070578.1	326072	A	G
NC_070578.1	328468	T	C
NC_070578.1	331280	G	A
NC_070578.1	331458	A	C
NC_070578.1	334241	G	A
NC_070578.1	337466	T	G
NC_070578.1	342410	G	C
NC_070578.1	346662	T	TTCTTC
NC_070578.1	348494	G	A
NC_070578.1	350086	C	CA
NC_070578.1	351031	T	G
NC_070578.1	356303	C	A
NC_070578.1	357722	G	A
NC_070578.1	361075	A	T
NC_070578.1	363143	G	A
NC_070578.1	364711	G	A
NC_070578.1	366234	T	G
NC_070578.1	369786	A	G
NC_070578.1	370667	C	T
NC_070578.1	377209	A	C
NC_070578.1	377275	C	CT
NC_070578.1	377292	C	T
NC_070578.1	377691	T	C
NC_070578.1	385148	A	AGATT
NC_070578.1	386767	A	AG
NC_070578.1	388216	C	T
NC_070578.1	390073	T	C
NC_070578.1	394455	T	G
NC_070578.1	404902	A	T
NC_070578.1	408062	C	T
NC_070578.1	410843	AACAC	A
NC_070578.1	414034	C	A
NC_070578.1	418017	A	C
NC_070578.1	420081	A	T
NC_070578.1	423867	G	A
NC_070578.1	424037	T	A
NC_070578.1	424507	T	C
NC_070578.1	432866	TTTTTTTTTTTTAAC	T
NC_070578.1	436928	T	C
NC_070578.1	439580	T	C
NC_070578.1	445267	C	A
NC_070578.1	455125	A	C
NC_070578.1	456273	ACT	A
NC_070578.1	456410	C	T
NC_070578.1	460109	C	T
NC_070578.1	460576	T	C
NC_070578.1	461700	T	A
NC_070578.1	461762	TTC	T
NC_070578.1	464934	G	C
NC_070578.1	465388	T	C
NC_070578.1	466862	C	T
NC_070578.1	467042	TGGGG	T
NC_070578.1	467047	C	CTAACCCTAA
NC_070578.1	467048	G	C
NC_070578.1	467050	G	GTAA
NC_070578.1	467051	C	CCCTAA
NC_070578.1	469879	C	T
NC_070578.1	470820	A	G
NC_070578.1	474240	C	G
NC_070578.1	474525	T	C
NC_070578.1	474780	GCTCCGTTTTCTGCTTCTTCCA	G
NC_070578.1	475073	G	A
NC_070578.1	479079	AATGT	A
NC_070578.1	479400	G	A
NC_070578.1	487377	ACT	A
NC_070578.1	488987	TGAA	T
NC_070578.1	492021	G	GAAAGTGGGATCC
NC_070578.1	495194	C	A
NC_070578.1	495992	T	G
NC_070578.1	501056	T	A
NC_070578.1	505937	C	T
NC_070578.1	510334	T	G
NC_070578.1	515881	A	G
NC_070578.1	519913	C	A
NC_070578.1	521143	G	GTTT
NC_070578.1	521144	GAGCAA	G
NC_070578.1	521150	TGACA	T
NC_070578.1	521155	A	T
NC_070578.1	522735	T	C
NC_070578.1	534954	A	C
NC_070578.1	543849	TTTTCTC	T
NC_070578.1	551066	G	C
NC_070578.1	551189	T	C
NC_070578.1	551255	T	G
NC_070578.1	552058	C	T
NC_070578.1	554611	G	C
NC_070578.1	554686	C	A
NC_070578.1	556173	C	G
NC_070578.1	559233	G	GACACCAAC
NC_070578.1	564609	A	T
NC_070578.1	574222	C	CCATTGTGTGGCTGTGGCCACAGGAGGA
NC_070578.1	575192	G	A
NC_070578.1	575634	G	A
NC_070578.1	576723	C	T
NC_070578.1	585022	G	T
NC_070578.1	585700	G	A
NC_070578.1	585911	C	T
NC_070578.1	587045	C	A
NC_070578.1	590479	T	C
NC_070578.1	595249	ACAATT	A
NC_070578.1	602694	TAATAATAAATAAATAAAATAA	T
NC_070578.1	602718	TAAGTTGTGATGTGTTCCAGGGGTTTGCTTTCAGTTCAGA	T
NC_070578.1	606516	C	T
NC_070578.1	608121	C	T
NC_070578.1	608123	G	A
NC_070578.1	608548	A	T
NC_070578.1	612023	C	A
NC_070578.1	615699	T	A
NC_070578.1	619504	T	A
NC_070578.1	626384	G	A
NC_070578.1	627576	C	T
NC_070578.1	627582	T	C
NC_070578.1	631198	CAT	C
NC_070578.1	633173	AT	A
NC_070578.1	633175	T	A
NC_070578.1	633177	C	G
NC_070578.1	634136	C	T
NC_070578.1	638387	T	A
NC_070578.1	639194	C	T
NC_070578.1	641547	G	A
NC_070578.1	643525	C	T
NC_070578.1	646299	A	C
NC_070578.1	663188	G	T
NC_070578.1	664774	T	C
NC_070578.1	673432	C	CA
NC_070578.1	676582	T	C
NC_070578.1	677564	G	A
NC_070578.1	706320	C	T
NC_070578.1	712317	TATATTTTTGTAAACCG	T
NC_070578.1	723977	TTATC	T
NC_070578.1	734978	T	C
NC_070578.1	752439	G	T
NC_070578.1	774632	A	G
NC_070578.1	788250	A	T
NC_070578.1	790879	G	A
NC_070578.1	810125	G	A
NC_070578.1	820151	G	T
NC_070578.1	820158	C	T
NC_070578.1	822530	G	A
NC_070578.1	825125	T	A
NC_070578.1	826108	GC	G
NC_070578.1	832056	G	C
NC_070578.1	838616	A	C
NC_070578.1	843613	A	G
NC_070578.1	844085	AAC	A
NC_070578.1	844197	C	T
NC_070578.1	848795	G	A
NC_070578.1	852852	AGTGTGTGTGT	A
NC_070578.1	854362	A	C
NC_070578.1	858746	T	A
NC_070578.1	862618	A	G
NC_070578.1	875230	C	T
NC_070578.1	875811	CTGTCTGACTTTACCA	C
NC_070578.1	875829	C	A
NC_070578.1	875830	T	TA
NC_070578.1	894294	C	T
NC_070578.1	908594	C	A
NC_070578.1	914122	G	A
NC_070578.1	914373	GGGGGTATGATGAGTGAAATACAGAGGTATTGGTTCACAAA	G
NC_070578.1	914472	G	GA
NC_070578.1	916152	GACTGAATAAACT	G
NC_070578.1	925268	C	T
NC_070578.1	927178	CAGCT	C
NC_070578.1	929648	A	C
NC_070578.1	934735	CCCAGACTTCCCTCTCCCCAGCCACTTCGTCCAGTT	C
NC_070578.1	936450	C	T
NC_070578.1	937295	G	A
NC_070578.1	948401	G	GA
NC_070578.1	951656	G	A
NC_070578.1	952314	A	T
NC_070578.1	954095	G	A
NC_070578.1	960785	G	A
NC_070578.1	965683	G	A
NC_070578.1	967682	ACTTGACCCATAGACGGG	A
NC_070578.1	972290	G	A
NC_070578.1	972377	C	A
NC_070578.1	981961	G	A
NC_070578.1	986583	T	C
NC_070578.1	996216	G	A
NC_070578.1	997138	CTGTCATG	C
NC_070578.1	998280	C	G
NC_070578.1	1003664	C	G
NC_070578.1	1005859	C	T
NC_070578.1	1006400	A	G
NC_070578.1	1006876	G	T
NC_070578.1	1007620	TAATTGTGAAA	T
NC_070578.1	1015111	C	T
NC_070578.1	1024407	C	A
NC_070578.1	1031819	G	T
NC_070578.1	1054537	A	G
NC_070578.1	1077434	G	A
NC_070578.1	1093384	A	C
NC_070578.1	1102359	G	A
NC_070578.1	1106178	G	T
NC_070578.1	1111160	GT	G
NC_070578.1	1124616	C	T
NC_070578.1	1130818	T	A
NC_070578.1	1131865	T	C
NC_070578.1	1135034	G	A
NC_070578.1	1135101	C	T
NC_070578.1	1140065	C	T
NC_070578.1	1140098	G	A
NC_070578.1	1140104	G	A
NC_070578.1	1156692	A	G
NC_070578.1	1158641	A	T
NC_070578.1	1160216	G	A
NC_070578.1	1164751	T	C
NC_070578.1	1165562	T	TATTATC
NC_070578.1	1168687	TGGCGGGGA	T
NC_070578.1	1181287	C	A
NC_070578.1	1186451	G	A
NC_070578.1	1189345	TC	T
NC_070578.1	1189348	C	A
NC_070578.1	1194666	T	C
NC_070578.1	1195201	C	A
NC_070578.1	1195857	C	T
NC_070578.1	1197438	T	C
NC_070578.1	1199552	C	CCA
NC_070578.1	1205130	C	T
NC_070578.1	1206568	T	C
NC_070578.1	1218940	G	A
NC_070578.1	1220881	T	C
NC_070578.1	1222429	T	G
NC_070578.1	1223146	C	G
NC_070578.1	1225043	T	C
NC_070578.1	1226415	C	T
NC_070578.1	1234159	ATG	A
NC_070578.1	1235220	C	G
NC_070578.1	1240194	GATGTGTTGTA	G
NC_070578.1	1259906	TTTGCACTGG	T
NC_070578.1	1260921	T	A
NC_070578.1	1262257	TGTTTTGTGAAA	T
NC_070578.1	1264665	ATATCTATCTATC	A
NC_070578.1	1277379	G	A
NC_070578.1	1282027	G	A
NC_070578.1	1293738	A	C
NC_070578.1	1294031	T	C
NC_070578.1	1304062	G	A
NC_070578.1	1310184	C	G
NC_070578.1	1310202	C	A
NC_070578.1	1310448	T	A
NC_070578.1	1311589	AT	A
NC_070578.1	1311999	C	A
NC_070578.1	1313790	GAT	G
NC_070578.1	1318482	T	A
NC_070578.1	1323518	T	C
NC_070578.1	1324769	A	G
NC_070578.1	1326002	TGGGGGG	T
NC_070578.1	1326760	A	T
NC_070578.1	1328315	G	A
NC_070578.1	1328585	G	A
NC_070578.1	1331970	C	T
NC_070578.1	1344505	C	CTATA
NC_070578.1	1347238	T	C
NC_070578.1	1350433	AACGTT	A
NC_070578.1	1350694	G	A
NC_070578.1	1350695	C	G
NC_070578.1	1350928	C	CACA
NC_070578.1	1351328	G	A
NC_070578.1	1355689	C	T
NC_070578.1	1359070	G	GT
NC_070578.1	1384147	TAAAAAAGGGATTGAAAAAATCGAGCTACATGAGAAGTCTCTTGCACATCGACAGACAGAGAAAACA	T
NC_070578.1	1386380	C	G
NC_070578.1	1386388	T	C
NC_070578.1	1386746	A	C
NC_070578.1	1386818	T	C
NC_070578.1	1386897	T	G
NC_070578.1	1386974	C	G
NC_070578.1	1387009	C	T
NC_070578.1	1387040	G	A
NC_070578.1	1387263	T	A
NC_070578.1	1387336	A	G
NC_070578.1	1387889	A	C
NC_070578.1	1387943	T	C
NC_070578.1	1388013	A	G
NC_070578.1	1388041	T	A
NC_070578.1	1388119	C	T
NC_070578.1	1388128	C	G
NC_070578.1	1407770	C	T
NC_070578.1	1412365	C	CTTATTG
NC_070578.1	1412746	T	A
NC_070578.1	1412747	C	A
NC_070578.1	1417339	TGTCTGGCCCC	T
NC_070578.1	1417350	T	A
NC_070578.1	1422827	CGGG	C
NC_070578.1	1422831	G	C
NC_070578.1	1426725	A	T
NC_070578.1	1434464	C	A
NC_070578.1	1435192	A	T
NC_070578.1	1436825	CGGT	C
NC_070578.1	1438437	A	C
NC_070578.1	1438568	G	A
NC_070578.1	1439659	T	G
NC_070578.1	1449678	T	G
NC_070578.1	1450311	T	TA
NC_070578.1	1454348	C	T
NC_070578.1	1460505	C	T
NC_070578.1	1462080	A	AG
NC_070578.1	1462286	GAC	G
NC_070578.1	1465595	T	C
NC_070578.1	1481886	G	T
NC_070578.1	1482603	CAT	C
NC_070578.1	1496707	T	G
NC_070578.1	1497831	C	T
NC_070578.1	1502096	G	A
NC_070578.1	1503117	C	A
NC_070578.1	1505079	A	ATT
NC_070578.1	1505080	C	CTAT
NC_070578.1	1508959	G	A
NC_070578.1	1516704	C	T
NC_070578.1	1517453	T	G
NC_070578.1	1517461	G	A
NC_070578.1	1543933	ACCCCCCCC	A
NC_070578.1	1544504	C	T
NC_070578.1	1554747	T	A
NC_070578.1	1567588	TAG	T
NC_070578.1	1569600	T	G
NC_070578.1	1571543	G	A
NC_070578.1	1573762	A	C
NC_070578.1	1585929	C	A
NC_070578.1	1591187	G	A
NC_070578.1	1592026	C	T
NC_070578.1	1600132	ACTGGAGGAATTG	A
NC_070578.1	1602572	A	T
NC_070578.1	1602573	A	T
NC_070578.1	1602639	A	C
NC_070578.1	1602861	G	A
NC_070578.1	1608614	C	A
NC_070578.1	1611927	T	C
NC_070578.1	1614739	G	T
NC_070578.1	1626236	C	G
NC_070578.1	1632407	C	T
NC_070578.1	1635252	T	A
NC_070578.1	1647874	ACAACAG	A
NC_070578.1	1659178	GGTGTGTGT	G
NC_070578.1	1684826	A	C
NC_070578.1	1688737	T	C
NC_070578.1	1694289	C	T
NC_070578.1	1704237	C	CTTCCTTCTTTAT
NC_070578.1	1721514	A	T
NC_070578.1	1734420	G	A
NC_070578.1	1756528	TC	T
NC_070578.1	1756530	C	T
NC_070578.1	1762747	C	A
NC_070578.1	1763798	G	A
NC_070578.1	1770094	C	T
NC_070578.1	1782689	C	A
NC_070578.1	1787594	G	A
NC_070578.1	1794824	C	T
NC_070578.1	1806605	AACACAC	A
NC_070578.1	1807513	CCA	C
NC_070578.1	1809779	G	A
NC_070578.1	1816573	G	A
NC_070578.1	1830936	ATACTTAAAACCAGGAACCAG	A
NC_070578.1	1831020	G	A
NC_070578.1	1835331	C	T
NC_070578.1	1836800	G	T
NC_070578.1	1839256	AG	A
NC_070578.1	1840604	C	T
NC_070578.1	1841603	C	T
NC_070578.1	1849042	G	A
NC_070578.1	1856545	A	G
NC_070578.1	1906804	A	C
NC_070578.1	1914943	TTTC	T
NC_070578.1	1914948	C	T
NC_070578.1	1924004	A	G
NC_070578.1	1924630	A	T
NC_070578.1	1929752	C	CTGCCT
NC_070578.1	1937817	TCACACACACA	T
NC_070578.1	1937963	G	C
NC_070578.1	1965202	C	T
NC_070578.1	1977549	T	A
NC_070578.1	1979516	T	C
NC_070578.1	1979660	A	T
NC_070578.1	1989306	T	A
NC_070578.1	1989830	G	A
NC_070578.1	1990027	C	A
NC_070578.1	1990206	T	G
NC_070578.1	1994124	A	T
NC_070578.1	1994889	GGTGT	G
NC_070578.1	1999341	C	CTGTG
NC_070578.1	1999342	A	AACTG
NC_070578.1	2004103	ATTG	A
NC_070578.1	2004733	C	G
NC_070578.1	2005683	TA	T
NC_070578.1	2006759	C	T
NC_070578.1	2009052	C	T
NC_070578.1	2009182	A	C
NC_070578.1	2011258	C	G
NC_070578.1	2012287	A	T
NC_070578.1	2013784	G	A
NC_070578.1	2015230	A	C
NC_070578.1	2015768	CCCGTG	C
NC_070578.1	2015848	T	C
NC_070578.1	2015926	ATCCT	A
NC_070578.1	2015934	TCCGACC	T
NC_070578.1	2019783	C	A
NC_070578.1	2020565	T	C
NC_070578.1	2025957	T	C
NC_070578.1	2025999	TAAG	T
NC_070578.1	2027392	A	C
NC_070578.1	2028857	T	TA
NC_070578.1	2031904	C	A
NC_070578.1	2034706	A	G
NC_070578.1	2035421	T	C
NC_070578.1	2035422	G	A
NC_070578.1	2040712	T	A
NC_070578.1	2041659	T	C
NC_070578.1	2041829	T	A
NC_070578.1	2042518	C	A
NC_070578.1	2043645	A	C
NC_070578.1	2044829	C	T
NC_070578.1	2047602	CTTTCGTCA	C
NC_070578.1	2052954	GTCTGTTA	G
NC_070578.1	2055260	TAG	T
NC_070578.1	2062192	G	GAAAAAAA
NC_070578.1	2062918	T	C
NC_070578.1	2065504	G	A
NC_070578.1	2067686	A	T
NC_070578.1	2068613	T	C
NC_070578.1	2070161	G	T
NC_070578.1	2070837	G	T
NC_070578.1	2072568	A	C
NC_070578.1	2076372	T	C
NC_070578.1	2076584	G	A
NC_070578.1	2077273	C	T
NC_070578.1	2077598	G	T
NC_070578.1	2080288	G	A
NC_070578.1	2081076	A	G
NC_070578.1	2082823	C	CTGTTT
NC_070578.1	2082824	A	T
NC_070578.1	2082946	C	T
NC_070578.1	2087379	G	A
NC_070578.1	2092770	A	G
NC_070578.1	2093324	G	C
NC_070578.1	2094117	G	A
NC_070578.1	2095186	T	C
NC_070578.1	2098497	A	G
NC_070578.1	2102985	A	AAGGG
NC_070578.1	2104409	G	GTAACA
NC_070578.1	2104957	T	G
NC_070578.1	2107924	T	A
NC_070578.1	2107926	G	A
NC_070578.1	2109581	A	G
NC_070578.1	2110025	C	T
NC_070578.1	2110158	T	A
NC_070578.1	2110160	T	G
NC_070578.1	2110336	G	C
NC_070578.1	2110694	TA	T
NC_070578.1	2111489	A	T
NC_070578.1	2112996	A	G
NC_070578.1	2113408	T	C
NC_070578.1	2114727	TTA	T
NC_070578.1	2118810	TCC	T
NC_070578.1	2120011	C	G
NC_070578.1	2124892	C	T
NC_070578.1	2124980	A	T
NC_070578.1	2126368	A	C
NC_070578.1	2126904	CAG	C
NC_070578.1	2127338	C	A
NC_070578.1	2128257	C	A
NC_070578.1	2128689	C	T
NC_070578.1	2129402	T	C
NC_070578.1	2130164	A	C
NC_070578.1	2130252	T	G
NC_070578.1	2132792	GTT	G
NC_070578.1	2132796	CA	C
NC_070578.1	2133954	A	AGTGTGTGTGT
NC_070578.1	2134758	C	A
NC_070578.1	2134843	A	C
NC_070578.1	2136003	A	T
NC_070578.1	2141879	G	C
NC_070578.1	2143680	C	T
NC_070578.1	2143740	C	T
NC_070578.1	2147002	G	A
NC_070578.1	2147065	A	T
NC_070578.1	2148848	C	G
NC_070578.1	2149048	G	A
NC_070578.1	2152522	G	A
NC_070578.1	2153078	C	T
NC_070578.1	2153464	CTTTTTGCAGCCGTGCTGCTCAGCACACGA	C
NC_070578.1	2156036	ACAGATTTTG	A
NC_070578.1	2161050	T	C
NC_070578.1	2163663	A	T
NC_070578.1	2166562	C	T
NC_070578.1	2170238	G	A
NC_070578.1	2170306	C	G
NC_070578.1	2175016	A	G
NC_070578.1	2180357	T	C
NC_070578.1	2180366	T	C
NC_070578.1	2181668	G	A
NC_070578.1	2181720	C	T
NC_070578.1	2181794	G	C
NC_070578.1	2182448	G	A
NC_070578.1	2183336	C	A
NC_070578.1	2183341	T	G
NC_070578.1	2183930	A	G
NC_070578.1	2186755	G	C
NC_070578.1	2186821	C	T
NC_070578.1	2187513	T	G
NC_070578.1	2190491	C	T
NC_070578.1	2192318	G	A
NC_070578.1	2194537	C	A
NC_070578.1	2196732	T	A
NC_070578.1	2199717	T	C
NC_070578.1	2201523	C	A
NC_070578.1	2204165	G	GATATC
NC_070578.1	2204532	G	A
NC_070578.1	2205837	TCCTG	T
NC_070578.1	2208335	G	A
NC_070578.1	2208859	C	T
NC_070578.1	2211159	C	T
NC_070578.1	2212646	A	C
NC_070578.1	2213494	C	T
NC_070578.1	2217009	A	C
NC_070578.1	2217142	T	C
NC_070578.1	2218789	C	T
NC_070578.1	2222487	T	A
NC_070578.1	2228810	G	A
NC_070578.1	2229642	T	A
NC_070578.1	2233026	T	C
NC_070578.1	2237110	A	T
NC_070578.1	2238648	C	A
NC_070578.1	2238698	GCACACA	G
NC_070578.1	2239872	A	T
NC_070578.1	2241256	A	T
NC_070578.1	2243061	G	C
NC_070578.1	2244848	C	A
NC_070578.1	2245395	A	T
NC_070578.1	2245497	A	C
NC_070578.1	2246819	C	CT
NC_070578.1	2247640	ATGGAGAGTTGAGTTTTTTTCTCCTTGTTTTTAACATGGACTATCGAGTAGTTGGATGAAAAATCTTTTTTTTTTTTCTT	A
NC_070578.1	2248128	A	T
NC_070578.1	2250116	T	TTTG
NC_070578.1	2252549	G	A
NC_070578.1	2253956	TTA	T
NC_070578.1	2255839	GA	G
NC_070578.1	2260732	T	C
NC_070578.1	2262086	G	A
NC_070578.1	2262388	G	A
NC_070578.1	2263006	A	AGTGTGTGTGTGT
NC_070578.1	2264139	A	C
NC_070578.1	2269413	GATTTCCAA	G
NC_070578.1	2271797	G	T
NC_070578.1	2271985	T	G
NC_070578.1	2273959	C	G
NC_070578.1	2284131	C	T
NC_070578.1	2286586	C	T
NC_070578.1	2289801	G	GCAGCTCAGCTCAGCTCAGCTCAGCTCAGCT
NC_070578.1	2289833	A	AG
NC_070578.1	2289834	C	CTCAG
NC_070578.1	2290004	G	A
NC_070578.1	2290257	T	C
NC_070578.1	2291086	A	G
NC_070578.1	2295952	G	A
NC_070578.1	2298453	C	T
NC_070578.1	2298592	C	A
NC_070578.1	2299394	T	C
NC_070578.1	2301093	G	A
NC_070578.1	2303037	G	C
NC_070578.1	2303893	A	C
NC_070578.1	2304362	T	C
NC_070578.1	2304672	A	C
NC_070578.1	2304741	A	G
NC_070578.1	2304803	A	T
NC_070578.1	2305016	G	A
NC_070578.1	2305958	C	T
NC_070578.1	2305997	AAATTG	A
NC_070578.1	2306861	C	T
NC_070578.1	2308569	TA	T
NC_070578.1	2310796	G	A
NC_070578.1	2311286	AC	A
NC_070578.1	2311293	T	C
NC_070578.1	2312905	C	CATTAACAAACA
NC_070578.1	2313394	C	A
NC_070578.1	2317473	G	C
NC_070578.1	2317712	T	A
NC_070578.1	2318727	G	A
NC_070578.1	2318798	ATTTT	A
NC_070578.1	2318814	T	A
NC_070578.1	2323368	G	GACAC
NC_070578.1	2326318	T	A
NC_070578.1	2326979	T	C
NC_070578.1	2327301	CA	C
NC_070578.1	2328635	G	T
NC_070578.1	2329008	C	T
NC_070578.1	2329146	C	T
NC_070578.1	2334800	A	G
NC_070578.1	2335558	T	G
NC_070578.1	2335841	A	T
NC_070578.1	2340275	A	ATGTAGTTATGT
NC_070578.1	2341204	A	T
NC_070578.1	2341768	C	CT
NC_070578.1	2341769	A	AGTTAT
NC_070578.1	2342216	T	A
NC_070578.1	2342555	G	A
NC_070578.1	2342556	G	C
NC_070578.1	2342944	C	G
NC_070578.1	2343242	G	T
NC_070578.1	2343388	CAATATGTTAA	C
NC_070578.1	2345304	GC	G
NC_070578.1	2345311	T	A
NC_070578.1	2345694	A	T
NC_070578.1	2347063	C	T
NC_070578.1	2348633	TGGTGTACTTACAA	T
NC_070578.1	2349425	G	A
NC_070578.1	2352999	T	G
NC_070578.1	2353774	C	T
NC_070578.1	2355451	A	C
NC_070578.1	2356366	C	CA
NC_070578.1	2357165	A	T
NC_070578.1	2359149	A	T
NC_070578.1	2359845	CAT	C
NC_070578.1	2359854	TAAC	T
NC_070578.1	2360171	C	T
NC_070578.1	2360173	T	C
NC_070578.1	2365015	A	T
NC_070578.1	2366656	T	A
NC_070578.1	2368239	C	A
NC_070578.1	2369798	C	A
NC_070578.1	2370697	C	G
NC_070578.1	2370700	G	A
NC_070578.1	2371146	G	T
NC_070578.1	2371332	CCCTGCTAA	C
NC_070578.1	2371526	G	A
NC_070578.1	2371697	G	A
NC_070578.1	2371874	G	A
NC_070578.1	2371987	C	T
NC_070578.1	2372055	G	A
NC_070578.1	2372416	C	T
NC_070578.1	2372562	G	T
NC_070578.1	2372710	C	T
NC_070578.1	2372778	G	A
NC_070578.1	2382425	C	T
NC_070578.1	2383132	A	G
NC_070578.1	2385887	T	A
NC_070578.1	2387179	A	G
NC_070578.1	2388455	A	G
NC_070578.1	2388667	A	C
NC_070578.1	2388878	G	C
NC_070578.1	2388915	G	A
NC_070578.1	2389026	A	AC
NC_070578.1	2389028	T	A
NC_070578.1	2392157	T	C
NC_070578.1	2392225	C	T
NC_070578.1	2392342	G	A
NC_070578.1	2393497	GTCCATTTTGCTTGGGGCCCCCAAAT	G
NC_070578.1	2395466	C	T
NC_070578.1	2395731	G	A
NC_070578.1	2396013	T	A
NC_070578.1	2396041	T	A
NC_070578.1	2401905	G	A
NC_070578.1	2409333	A	G
NC_070578.1	2411180	A	G
NC_070578.1	2412556	A	AC
NC_070578.1	2414211	G	T
NC_070578.1	2419331	G	T
NC_070578.1	2419528	C	T
NC_070578.1	2419801	A	C
NC_070578.1	2420659	T	TCA
NC_070578.1	2422737	C	T
NC_070578.1	2423040	G	A
NC_070578.1	2423145	C	T
NC_070578.1	2423733	T	G
NC_070578.1	2425326	G	A
NC_070578.1	2425347	TGCTTTATCAGCAGTATGAAGTGCTCTCCAAACGTCTACATATCCTAATTCCTCACAAATCAA	T
NC_070578.1	2426228	CAAAACAA	C
NC_070578.1	2426322	C	T
NC_070578.1	2426578	C	A
NC_070578.1	2426652	G	A
NC_070578.1	2427098	G	A
NC_070578.1	2427381	T	A
NC_070578.1	2428992	G	A
NC_070578.1	2429251	A	G
NC_070578.1	2429456	C	G
NC_070578.1	2430206	G	C
NC_070578.1	2431499	G	A
NC_070578.1	2431598	A	T
NC_070578.1	2432178	C	T
NC_070578.1	2433345	CTG	C
NC_070578.1	2435452	C	T
NC_070578.1	2436724	TTTTG	T
NC_070578.1	2438413	C	T
NC_070578.1	2438415	G	T
NC_070578.1	2438537	G	A
NC_070578.1	2438602	AC	A
NC_070578.1	2439298	A	G
NC_070578.1	2439955	C	T
NC_070578.1	2441699	C	A
NC_070578.1	2444796	T	TCAAGGA
NC_070578.1	2445984	GT	G
NC_070578.1	2445987	AG	A
NC_070578.1	2447642	T	A
NC_070578.1	2451167	G	C
NC_070578.1	2453323	G	A
NC_070578.1	2455110	T	G
NC_070578.1	2455581	C	T
NC_070578.1	2456720	G	T
NC_070578.1	2456726	GGTGTGTGTGTGTGTGTGTGTGTGTGTGTGTGTGTGTGTGTGTGTGTGTGTGTGTGTGTGTGTGTGTGTGTGTGTGTGTGTGTGTGTGTGTGTGTGTGTGTGTGTGTGTGTGTGT	G
NC_070578.1	2457044	CACT	C
NC_070578.1	2458568	G	T
NC_070578.1	2461535	AT	A
NC_070578.1	2462660	G	C
NC_070578.1	2463218	T	TA
NC_070578.1	2463588	T	C
NC_070578.1	2468873	C	T
NC_070578.1	2470680	GAGTAAGTA	G
NC_070578.1	2470836	C	A
NC_070578.1	2471079	G	A
NC_070578.1	2472794	A	C
NC_070578.1	2475113	T	G
NC_070578.1	2477332	G	T
NC_070578.1	2481180	G	T
NC_070578.1	2486383	T	G
NC_070578.1	2487391	G	C
NC_070578.1	2494156	C	G
NC_070578.1	2498282	C	T
NC_070578.1	2498366	CTGCCTTAATA	C
NC_070578.1	2500267	A	T
NC_070578.1	2500275	T	A
NC_070578.1	2500489	T	A
NC_070578.1	2503066	C	T
NC_070578.1	2504969	A	T
NC_070578.1	2505387	C	T
NC_070578.1	2506352	T	G
NC_070578.1	2518440	G	A
NC_070578.1	2525001	AGAGGAG	A
NC_070578.1	2533120	G	A
NC_070578.1	2535410	A	G
NC_070578.1	2541961	A	G
NC_070578.1	2550407	G	T
NC_070578.1	2557210	A	T
NC_070578.1	2561837	A	G
NC_070578.1	2565352	A	AACTCTAATCAGAGGCGGTCCTGGCTAGTCTTGCGCCCTGGGCAGTTGCCCACATTGCCCATAGCAAAAACCGCCACTG
NC_070578.1	2570503	C	G
NC_070578.1	2578186	G	T
NC_070578.1	2578329	G	A
NC_070578.1	2582017	G	A
NC_070578.1	2582224	GCATGGGAAGTGTTCT	G
NC_070578.1	2582678	C	G
NC_070578.1	2584916	TACGGCCATTGTTGGGTGCATATCTGAAGGAA	T
NC_070578.1	2585287	C	A
NC_070578.1	2588708	C	T
NC_070578.1	2589277	G	A
NC_070578.1	2589517	T	C
NC_070578.1	2590104	A	C
NC_070578.1	2591417	TCATCCTGTGTTGACTGTATGAAA	T
NC_070578.1	2593539	G	A
NC_070578.1	2599752	G	A
NC_070578.1	2601321	ATGTG	A
NC_070578.1	2606675	G	A
NC_070578.1	2607431	A	T
NC_070578.1	2613836	T	C
NC_070578.1	2624214	C	G
NC_070578.1	2634343	TGTGTGTGTGTGTGTGTGTGTGTGTGTGTGTG	T
NC_070578.1	2634382	G	T
NC_070578.1	2635067	A	G
NC_070578.1	2643238	ATCTCTCTCTCTCTCTCTC	A
NC_070578.1	2655316	T	A
NC_070578.1	2658356	AT	A
NC_070578.1	2663488	A	G
NC_070578.1	2664920	C	T
NC_070578.1	2665793	C	T
NC_070578.1	2671990	GT	G
NC_070578.1	2678338	AT	A
NC_070578.1	2678343	T	A
NC_070578.1	2680252	A	G
NC_070578.1	2681354	G	T
NC_070578.1	2684758	T	C
NC_070578.1	2684760	C	T
NC_070578.1	2688308	G	A
NC_070578.1	2694042	A	T
NC_070578.1	2694449	AT	A
NC_070578.1	2700278	G	A
NC_070578.1	2704271	G	T
NC_070578.1	2711458	G	A
NC_070578.1	2720229	G	T
NC_070578.1	2725374	A	G
NC_070578.1	2727523	T	C
NC_070578.1	2730755	T	TGAACA
NC_070578.1	2730756	TC	T
NC_070578.1	2730759	CT	C
NC_070578.1	2732072	G	C
NC_070578.1	2738504	T	G
NC_070578.1	2744024	G	T
NC_070578.1	2750846	G	A
NC_070578.1	2760577	C	A
NC_070578.1	2765303	G	A
NC_070578.1	2770180	AACATCTCATTTCCTATTTCTATGAAAGAT	A
NC_070578.1	2770213	GCGTGTGGGTGTGGAGGAGCTGTGTGAAGGTGTCTTTGATGGAGCTGACA	G
NC_070578.1	2781675	A	C
NC_070578.1	2783315	G	T
NC_070578.1	2783653	C	T
NC_070578.1	2788423	GCACA	G
NC_070578.1	2791288	G	T
NC_070578.1	2792804	C	T
NC_070578.1	2806114	G	C
NC_070578.1	2808990	T	TAAAA
NC_070578.1	2808991	T	TTATTATTAATTAA
NC_070578.1	2810841	G	A
NC_070578.1	2812657	T	G
NC_070578.1	2816216	C	T
NC_070578.1	2831286	A	G
NC_070578.1	2836994	T	A
NC_070578.1	2853104	T	A
NC_070578.1	2857345	G	A
NC_070578.1	2860111	C	G
NC_070578.1	2860196	TGAGTTAGCC	T
NC_070578.1	2863845	A	T
NC_070578.1	2865169	AGCTGCT	A
NC_070578.1	2871237	G	C
NC_070578.1	2877307	A	G
NC_070578.1	2891780	C	A
NC_070578.1	2895181	T	A
NC_070578.1	2900975	C	T
NC_070578.1	2900978	CGT	C
NC_070578.1	2900981	A	ACT
NC_070578.1	2908272	C	T
NC_070578.1	2908273	A	T
NC_070578.1	2911768	G	T
NC_070578.1	2913025	T	C
NC_070578.1	2914885	A	G
NC_070578.1	2915088	AGGGTTAATGCACAACCTT	A
NC_070578.1	2915109	T	A
NC_070578.1	2915111	CCTGT	C
NC_070578.1	2915119	T	A
NC_070578.1	2915232	C	T
NC_070578.1	2915257	C	CG
NC_070578.1	2920264	A	T
NC_070578.1	2921445	T	C
NC_070578.1	2926446	C	T
NC_070578.1	2926830	G	A
NC_070578.1	2927515	T	C
NC_070578.1	2927708	A	T
NC_070578.1	2929931	A	T
NC_070578.1	2929933	A	T
NC_070578.1	2930314	A	G
NC_070578.1	2934432	C	G
NC_070578.1	2934755	G	A
NC_070578.1	2945006	C	CACTACT
NC_070578.1	2951660	A	C
NC_070578.1	2954904	T	G
NC_070578.1	2959247	T	A
NC_070578.1	2963366	A	C
NC_070578.1	2968074	C	CTTA
NC_070578.1	2974215	T	TACACAC
NC_070578.1	2985510	C	T
NC_070578.1	2987967	A	AATTATT
NC_070578.1	2991472	C	T
NC_070578.1	2995607	C	T
NC_070578.1	2999674	T	G
NC_070578.1	2999707	A	C
NC_070578.1	3005404	ACTATTCTATT	A
NC_070578.1	3020778	C	T
NC_070578.1	3031824	T	TTAC
NC_070578.1	3039541	A	G
NC_070578.1	3043135	A	T
NC_070578.1	3043139	T	A
NC_070578.1	3046687	A	T
NC_070578.1	3055427	A	G
NC_070578.1	3059997	A	T
NC_070578.1	3061350	T	A
NC_070578.1	3063720	A	C
NC_070578.1	3064744	C	T
NC_070578.1	3064951	C	T
NC_070578.1	3068943	G	A
NC_070578.1	3072892	TA	T
NC_070578.1	3073504	G	A
NC_070578.1	3079633	C	T
NC_070578.1	3082007	G	A
NC_070578.1	3088178	A	C
NC_070578.1	3088820	G	A
NC_070578.1	3100706	CTG	C
NC_070578.1	3102442	T	G
NC_070578.1	3106127	G	T
NC_070578.1	3121324	T	TCA
NC_070578.1	3123507	T	C
NC_070578.1	3124464	T	C
NC_070578.1	3128869	G	C
NC_070578.1	3131231	C	T
NC_070578.1	3136364	C	T
NC_070578.1	3145172	G	A
NC_070578.1	3146280	T	C
NC_070578.1	3156801	C	G
NC_070578.1	3160854	T	G
NC_070578.1	3165632	CGGGCTAGCCGCT	C
NC_070578.1	3167283	G	T
NC_070578.1	3172002	CTGATCGGTA	C
NC_070578.1	3173130	CGTGTGTGTGTGTGTGTGTGTGT	C
NC_070578.1	3173642	G	C
NC_070578.1	3176957	A	G
NC_070578.1	3191581	C	T
NC_070578.1	3193047	G	A
NC_070578.1	3196086	T	C
NC_070578.1	3205901	A	T
NC_070578.1	3214415	G	A
NC_070578.1	3217709	GCAGAGGGGAGAA	G
NC_070578.1	3218599	AAACACATCGCACAAATG	A
NC_070578.1	3234399	G	A
NC_070578.1	3236446	C	T
NC_070578.1	3239083	G	A
NC_070578.1	3240517	A	AT
NC_070578.1	3250064	G	A
NC_070578.1	3265516	G	A
NC_070578.1	3269482	C	T
NC_070578.1	3277576	G	A
NC_070578.1	3283138	G	A
NC_070578.1	3283147	A	G
NC_070578.1	3283149	C	T
NC_070578.1	3286035	A	G
NC_070578.1	3287807	G	GA
NC_070578.1	3297426	G	C
NC_070578.1	3300637	G	A
NC_070578.1	3302565	G	A
NC_070578.1	3302591	C	T
NC_070578.1	3302595	G	A
NC_070578.1	3303033	G	A
NC_070578.1	3303042	A	C
NC_070578.1	3323957	C	CA
NC_070578.1	3324510	C	A
NC_070578.1	3344207	A	AATCT
NC_070578.1	3355384	T	C
NC_070578.1	3355533	C	T
NC_070578.1	3393900	G	T
NC_070578.1	3436034	C	T
NC_070578.1	3439843	TTTTCCTCTCTTTG	T
NC_070578.1	3441150	GTATC	G
NC_070578.1	3441299	A	AC
NC_070578.1	3475649	G	GAT
NC_070578.1	3475871	C	T
NC_070578.1	3518655	T	C
NC_070578.1	3578400	C	A
NC_070578.1	3578412	G	A
NC_070578.1	3585949	G	T
NC_070578.1	3591401	G	T
NC_070578.1	3591409	T	A
NC_070578.1	3602150	C	T
NC_070578.1	3656238	AAGATAGAT	A
NC_070578.1	3729820	C	T
NC_070578.1	3791009	T	G
NC_070578.1	3824864	A	T
NC_070578.1	3844050	T	TCA
NC_070578.1	3851870	T	TCA
NC_070578.1	3872209	ACTAT	A
NC_070578.1	3923386	C	G
NC_070578.1	3928985	CT	C
NC_070578.1	3935295	T	TA
NC_070578.1	3938083	A	C
NC_070578.1	3938424	G	A
NC_070578.1	3943352	TGATAGATAGATAGATA	T
NC_070578.1	3967326	T	A
NC_070578.1	3970218	C	CT
NC_070578.1	3995020	C	G
NC_070578.1	4039633	GATAGATAC	G
NC_070578.1	4045359	G	A
NC_070578.1	4047303	T	A
NC_070578.1	4049365	T	G
NC_070578.1	4050587	T	C
NC_070578.1	4056352	A	C
NC_070578.1	4059405	T	G
NC_070578.1	4062575	C	T
NC_070578.1	4067658	G	C
NC_070578.1	4067827	A	C
NC_070578.1	4070882	G	C
NC_070578.1	4071427	G	T
NC_070578.1	4071431	T	C
NC_070578.1	4071461	A	G
NC_070578.1	4075457	A	C
NC_070578.1	4106032	G	C
NC_070578.1	4126494	G	A
NC_070578.1	4127409	C	T
NC_070578.1	4128014	G	A
NC_070578.1	4128021	A	C
NC_070578.1	4128023	G	GACCC
NC_070578.1	4128540	C	A
NC_070578.1	4150601	T	C
NC_070578.1	4154982	T	TA
NC_070578.1	4156900	ATTTGT	A
NC_070578.1	4160752	C	T
NC_070578.1	4162022	TAA	T
NC_070578.1	4162073	CAA	C
NC_070578.1	4162143	G	A
NC_070578.1	4162367	T	TG
NC_070578.1	4166217	C	CA
NC_070578.1	4174772	T	C
NC_070578.1	4175334	CAG	C
NC_070578.1	4183131	A	T
NC_070578.1	4183133	T	A
NC_070578.1	4191646	G	A
NC_070578.1	4194815	T	TAA
NC_070578.1	4226317	C	A
NC_070578.1	4226320	A	T
NC_070578.1	4234794	C	T
NC_070578.1	4240504	CA	C
NC_070578.1	4250843	A	C
NC_070578.1	4259875	AC	A
NC_070578.1	4281259	A	G
NC_070578.1	4288657	G	A
NC_070578.1	4292047	C	A
NC_070578.1	4303039	A	ATG
NC_070578.1	4309738	C	T
NC_070578.1	4313367	TGGCTCA	T
NC_070578.1	4319596	A	AGT
NC_070578.1	4321496	T	C
NC_070578.1	4323559	G	A
NC_070578.1	4334067	A	T
NC_070578.1	4336455	GGAAGT	G
NC_070578.1	4361800	A	G
NC_070578.1	4363029	GAA	G
NC_070578.1	4364501	T	G
NC_070578.1	4377282	GTCTC	G
NC_070578.1	4383329	A	T
NC_070578.1	4390990	A	C
NC_070578.1	4393066	C	T
NC_070578.1	4408403	TG	T
NC_070578.1	4409408	T	A
NC_070578.1	4410681	ATTTATTTTCTT	A
NC_070578.1	4424994	C	A
NC_070578.1	4425421	G	C
NC_070578.1	4427188	A	G
NC_070578.1	4427261	A	G
NC_070578.1	4430397	T	C
NC_070578.1	4430892	C	A
NC_070578.1	4432511	A	G
NC_070578.1	4433769	AGTAGTATAGT	A
NC_070578.1	4434414	A	ATAGTG
NC_070578.1	4435750	G	A
NC_070578.1	4435763	G	A
NC_070578.1	4436861	G	T
NC_070578.1	4441047	GATACAATATGATACAATACAATATAATACGATACA	G
NC_070578.1	4447347	T	C
NC_070578.1	4447432	C	A
NC_070578.1	4449622	A	G
NC_070578.1	4455611	T	C
NC_070578.1	4457179	A	T
NC_070578.1	4457854	A	T
NC_070578.1	4458498	A	G
NC_070578.1	4460405	A	G
NC_070578.1	4461756	GCTC	G
NC_070578.1	4463157	G	A
NC_070578.1	4463646	C	T
NC_070578.1	4464628	G	T
NC_070578.1	4465003	CTCCTCTGTCCTCCTG	C
NC_070578.1	4465982	T	G
NC_070578.1	4466127	G	A
NC_070578.1	4468614	A	G
NC_070578.1	4468804	CATAATGTA	C
NC_070578.1	4469913	T	TGTGC
NC_070578.1	4473304	G	A
NC_070578.1	4473803	A	T
NC_070578.1	4478822	A	C
NC_070578.1	4486400	G	A
NC_070578.1	4486402	A	C
NC_070578.1	4487107	G	C
NC_070578.1	4488159	CTACTCACCAACCTACCTACCTACT	C
NC_070578.1	4488581	T	TACCA
NC_070578.1	4490633	T	TA
NC_070578.1	4493005	G	C
NC_070578.1	4493036	A	T
NC_070578.1	4493614	A	G
NC_070578.1	4494905	ACACG	A
NC_070578.1	4496714	A	T
NC_070578.1	4498042	C	T
NC_070578.1	4500597	C	T
NC_070578.1	4501119	AACACGTACACACAC	A
NC_070578.1	4504460	G	T
NC_070578.1	4504613	C	T
NC_070578.1	4504876	A	C
NC_070578.1	4505137	C	T
NC_070578.1	4505614	C	T
NC_070578.1	4507913	G	A
NC_070578.1	4508286	A	AAG
NC_070578.1	4508287	T	TAG
NC_070578.1	4508288	T	TGA
NC_070578.1	4508290	C	A
NC_070578.1	4509097	T	A
NC_070578.1	4511242	CA	C
NC_070578.1	4512022	T	G
NC_070578.1	4512243	G	T
NC_070578.1	4512270	G	GTGTGTGTGTGTGTGTGTT
NC_070578.1	4515962	C	T
NC_070578.1	4517449	C	T
NC_070578.1	4518477	C	G
NC_070578.1	4523464	A	G
NC_070578.1	4523481	C	T
NC_070578.1	4525070	A	T
NC_070578.1	4528279	T	C
NC_070578.1	4528725	CAT	C
NC_070578.1	4528840	C	A
NC_070578.1	4529712	GACAAGGCC	G
NC_070578.1	4530473	G	A
NC_070578.1	4530846	G	A
NC_070578.1	4531698	C	A
NC_070578.1	4531847	C	A
NC_070578.1	4534375	CACTCTGTT	C
NC_070578.1	4538785	G	T
NC_070578.1	4540894	A	G
NC_070578.1	4542466	G	C
NC_070578.1	4544856	G	T
NC_070578.1	4548435	C	CA
NC_070578.1	4551007	T	G
NC_070578.1	4555092	C	T
NC_070578.1	4567469	C	CCTCCCCTGAT
NC_070578.1	4568770	G	GATTTTCTTTTGAGTATTGAGT
NC_070578.1	4571407	C	A
NC_070578.1	4571918	A	G
NC_070578.1	4574724	T	C
NC_070578.1	4574884	A	G
NC_070578.1	4574902	T	A
NC_070578.1	4576742	C	A
NC_070578.1	4579294	T	TCA
NC_070578.1	4579505	C	CGTGT
NC_070578.1	4579636	A	ACTCT
NC_070578.1	4579651	G	GTT
NC_070578.1	4580066	C	T
NC_070578.1	4582725	C	T
NC_070578.1	4583251	C	T
NC_070578.1	4583503	T	C
NC_070578.1	4585227	G	GT
NC_070578.1	4587241	AT	A
NC_070578.1	4587621	T	G
NC_070578.1	4589561	A	T
NC_070578.1	4595350	G	A
NC_070578.1	4595494	C	T
NC_070578.1	4601991	A	G
NC_070578.1	4602340	A	ATG
NC_070578.1	4606420	C	G
NC_070578.1	4606487	C	T
NC_070578.1	4607883	G	A
NC_070578.1	4612185	AG	A
NC_070578.1	4612248	G	A
NC_070578.1	4612600	GCTCTCTCTCTCTCTCTCTCTCT	G
NC_070578.1	4615185	A	T
NC_070578.1	4615547	CACACAT	C
NC_070578.1	4618243	G	A
NC_070578.1	4618425	A	G
NC_070578.1	4621360	C	T
NC_070578.1	4623284	T	C
NC_070578.1	4623302	G	T
NC_070578.1	4624868	G	A
NC_070578.1	4626006	CTG	C
NC_070578.1	4627446	G	A
NC_070578.1	4634451	T	TA
NC_070578.1	4634816	A	C
NC_070578.1	4635718	TACACAGACACACAC	T
NC_070578.1	4637104	C	T
NC_070578.1	4638330	C	T
NC_070578.1	4639404	A	G
NC_070578.1	4640144	T	C
NC_070578.1	4640293	G	T
NC_070578.1	4641238	A	G
NC_070578.1	4641612	G	C
NC_070578.1	4643106	C	A
NC_070578.1	4643114	A	C
NC_070578.1	4644348	G	A
NC_070578.1	4644404	A	C
NC_070578.1	4644405	G	A
NC_070578.1	4644737	C	A
NC_070578.1	4645238	AAAGTAGTAATTTAACCCAAACAATGAATTTTACCTCAACCGAACC	A
NC_070578.1	4648320	T	G
NC_070578.1	4648705	C	T
NC_070578.1	4649066	ATGGAGCATTT	A
NC_070578.1	4649312	T	C
NC_070578.1	4651518	A	AGT
NC_070578.1	4651796	C	T
NC_070578.1	4652374	G	A
NC_070578.1	4673304	G	A
NC_070578.1	4674825	C	T
NC_070578.1	4675036	C	T
NC_070578.1	4678085	C	G
NC_070578.1	4680670	G	C
NC_070578.1	4681917	T	TC
NC_070578.1	4682782	T	G
NC_070578.1	4684087	TTCA	T
NC_070578.1	4685457	G	A
NC_070578.1	4685615	C	G
NC_070578.1	4685658	G	A
NC_070578.1	4685846	T	A
NC_070578.1	4686024	TACACC	T
NC_070578.1	4687257	G	A
NC_070578.1	4688954	T	C
NC_070578.1	4689851	ATCTGGC	A
NC_070578.1	4690609	C	CA
NC_070578.1	4690677	T	C
NC_070578.1	4690801	G	A
NC_070578.1	4691534	G	A
NC_070578.1	4693415	G	C
NC_070578.1	4693513	A	G
NC_070578.1	4694719	C	T
NC_070578.1	4695683	GTT	G
NC_070578.1	4695686	T	A
NC_070578.1	4695872	C	T
NC_070578.1	4696339	T	C
NC_070578.1	4697158	C	CATGTTAGCTTCA
NC_070578.1	4700612	CA	C
NC_070578.1	4700615	A	T
NC_070578.1	4702380	G	T
NC_070578.1	4702935	G	A
NC_070578.1	4704135	T	G
NC_070578.1	4706590	T	A
NC_070578.1	4709121	A	ACTAAGAATAACTGCGTAAATAACAACAGGTGCAGACAGCAGTAT
NC_070578.1	4709826	C	G
NC_070578.1	4715331	A	T
NC_070578.1	4715677	T	A
NC_070578.1	4720379	T	TATTA
NC_070578.1	4726881	A	G
NC_070578.1	4728670	CATT	C
NC_070578.1	4730652	C	T
NC_070578.1	4733750	G	A
NC_070578.1	4734978	C	T
NC_070578.1	4735855	C	T
NC_070578.1	4736201	G	A
NC_070578.1	4738778	TG	T
NC_070578.1	4745573	G	A
NC_070578.1	4748108	G	A
NC_070578.1	4749241	A	G
NC_070578.1	4750089	A	T
NC_070578.1	4750826	C	G
NC_070578.1	4751173	T	G
NC_070578.1	4753332	G	A
NC_070578.1	4754793	C	T
NC_070578.1	4755977	G	A
NC_070578.1	4756670	A	T
NC_070578.1	4757978	A	C
NC_070578.1	4759451	A	G
NC_070578.1	4759922	T	C
NC_070578.1	4760943	G	T
NC_070578.1	4761418	G	C
NC_070578.1	4761682	G	A
NC_070578.1	4761742	G	A
NC_070578.1	4762527	T	C
NC_070578.1	4763422	G	A
NC_070578.1	4764654	TGTATC	T
NC_070578.1	4764916	C	CT
NC_070578.1	4765903	A	C
NC_070578.1	4767561	G	A
NC_070578.1	4772465	G	A
NC_070578.1	4773438	G	A
NC_070578.1	4777913	A	G
NC_070578.1	4779556	A	T
NC_070578.1	4779985	C	T
NC_070578.1	4780961	G	T
NC_070578.1	4781836	T	G
NC_070578.1	4781842	T	TTTA
NC_070578.1	4783937	T	C
NC_070578.1	4784967	G	GCAGTGCCTGACATGATTTGATTTGAACCTTACA
NC_070578.1	4785623	G	A
NC_070578.1	4787619	G	T
NC_070578.1	4788245	G	A
NC_070578.1	4790674	C	T
NC_070578.1	4790837	TTATATATATATATATA	T
NC_070578.1	4791030	CTTTTT	C
NC_070578.1	4793819	A	C
NC_070578.1	4793999	C	A
NC_070578.1	4794009	C	T
NC_070578.1	4794420	G	A
NC_070578.1	4795229	A	T
NC_070578.1	4795543	C	A
NC_070578.1	4795647	T	A
NC_070578.1	4795669	T	C
NC_070578.1	4796731	ATAAAT	A
NC_070578.1	4797220	TACTGCTG	T
NC_070578.1	4797550	G	C
NC_070578.1	4797882	C	T
NC_070578.1	4798012	A	G
NC_070578.1	4798414	C	A
NC_070578.1	4798975	G	A
NC_070578.1	4800017	T	A
NC_070578.1	4800832	C	T
NC_070578.1	4801119	C	A
NC_070578.1	4801672	G	A
NC_070578.1	4802267	CA	C
NC_070578.1	4802898	A	AATT
NC_070578.1	4803645	G	A
NC_070578.1	4804534	G	A
NC_070578.1	4808055	T	A
NC_070578.1	4808562	A	T
NC_070578.1	4811897	C	G
NC_070578.1	4815379	T	C
NC_070578.1	4816686	G	C
NC_070578.1	4820161	A	T
NC_070578.1	4822064	A	C
NC_070578.1	4825223	T	G
NC_070578.1	4827530	G	C
NC_070578.1	4829064	C	T
NC_070578.1	4834568	C	G
NC_070578.1	4836979	TC	T
NC_070578.1	4836981	AG	A
NC_070578.1	4836985	TC	T
NC_070578.1	4839389	G	T
NC_070578.1	4840558	A	G
NC_070578.1	4841174	C	A
NC_070578.1	4841650	G	A
NC_070578.1	4843267	A	G
NC_070578.1	4843826	G	T
NC_070578.1	4843962	C	A
NC_070578.1	4844269	CACTGGTCAGTTTTAAATTGGAATCATAG	C
NC_070578.1	4844731	C	A
NC_070578.1	4845436	A	T
NC_070578.1	4845722	T	C
NC_070578.1	4847275	A	T
NC_070578.1	4847450	T	G
NC_070578.1	4848008	C	A
NC_070578.1	4848620	G	T
NC_070578.1	4849313	TGTGTGTGTGTGTGA	T
NC_070578.1	4850011	T	A
NC_070578.1	4850148	A	G
NC_070578.1	4850500	G	A
NC_070578.1	4850598	C	T
NC_070578.1	4853925	A	G
NC_070578.1	4859049	G	GTA
NC_070578.1	4859172	TTC	T
NC_070578.1	4859176	GTTC	G
NC_070578.1	4859867	G	A
NC_070578.1	4864503	CA	C
NC_070578.1	4864982	TCACA	T
NC_070578.1	4878212	C	T
NC_070578.1	4881530	C	G
NC_070578.1	4884110	T	G
NC_070578.1	4888026	C	CT
NC_070578.1	4893027	C	T
NC_070578.1	4895508	G	A
NC_070578.1	4900506	T	C
NC_070578.1	4900665	T	C
NC_070578.1	4903437	C	T
NC_070578.1	4907136	A	G
NC_070578.1	4908991	C	T
NC_070578.1	4915808	C	CGAGTTTAAGTAAGA
NC_070578.1	4928584	C	T
NC_070578.1	4931037	G	A
NC_070578.1	4931104	G	A
NC_070578.1	4941142	C	T
NC_070578.1	4944892	A	T
NC_070578.1	4945764	TTG	T
NC_070578.1	4947304	G	T
NC_070578.1	4950990	A	T
NC_070578.1	4951013	TTATACTTGAG	T
NC_070578.1	4953696	C	CTGTG
NC_070578.1	4957507	A	C
NC_070578.1	4969380	G	A
NC_070578.1	4989768	A	G
NC_070578.1	5000106	G	A
NC_070578.1	5006588	G	C
NC_070578.1	5006666	T	G
NC_070578.1	5013541	A	T
NC_070578.1	5018251	T	C
NC_070578.1	5042927	T	A
NC_070578.1	5042928	G	T
NC_070578.1	5044615	T	G
NC_070578.1	5044620	T	C
NC_070578.1	5044621	T	C
NC_070578.1	5047571	T	C
NC_070578.1	5048794	G	C
NC_070578.1	5052229	T	G
NC_070578.1	5058958	T	C
NC_070578.1	5065952	CAATGTTTTTTTTTTA	C
NC_070578.1	5072101	C	T
NC_070578.1	5072252	C	T
NC_070578.1	5073703	A	C
NC_070578.1	5075334	AACACACAC	A
NC_070578.1	5081459	T	A
NC_070578.1	5081962	A	T
NC_070578.1	5085160	C	T
NC_070578.1	5091625	C	A
NC_070578.1	5093290	C	T
NC_070578.1	5094344	GA	G
NC_070578.1	5098930	C	T
NC_070578.1	5104837	T	G
NC_070578.1	5105212	G	A
NC_070578.1	5108273	T	C
NC_070578.1	5109294	G	A
NC_070578.1	5109950	A	C
NC_070578.1	5114281	A	T
NC_070578.1	5115971	C	A
NC_070578.1	5116222	G	T
NC_070578.1	5122457	G	T
NC_070578.1	5125155	A	C
NC_070578.1	5128113	A	G
NC_070578.1	5129923	G	T
NC_070578.1	5131556	T	C
NC_070578.1	5132508	TTGA	T
NC_070578.1	5134934	T	A
NC_070578.1	5135154	G	C
NC_070578.1	5136127	T	C
NC_070578.1	5137948	C	T
NC_070578.1	5144440	G	T
NC_070578.1	5145483	T	C
NC_070578.1	5145616	A	C
NC_070578.1	5148152	C	T
NC_070578.1	5148204	C	T
NC_070578.1	5149535	C	T
NC_070578.1	5151778	T	C
NC_070578.1	5152903	A	C
NC_070578.1	5153625	G	GA
NC_070578.1	5155936	A	G
NC_070578.1	5156392	A	G
NC_070578.1	5160504	T	C
NC_070578.1	5163352	AAGTTGTAATCAATTC	A
NC_070578.1	5166352	C	G
NC_070578.1	5166596	G	T
NC_070578.1	5167469	TTCA	T
NC_070578.1	5167561	T	G
NC_070578.1	5167927	T	TAC
NC_070578.1	5168600	G	A
NC_070578.1	5168909	G	C
NC_070578.1	5168966	T	G
NC_070578.1	5169100	G	T
NC_070578.1	5169850	CA	C
NC_070578.1	5172345	A	C
NC_070578.1	5172453	G	C
NC_070578.1	5172610	A	G
NC_070578.1	5172644	G	A
NC_070578.1	5172732	G	C
NC_070578.1	5173322	T	A
NC_070578.1	5173341	C	T
NC_070578.1	5173457	A	ACACACACACACACACACATACATG
NC_070578.1	5174947	C	A
NC_070578.1	5176387	C	CCAA
NC_070578.1	5176394	A	AATC
NC_070578.1	5176798	T	C
NC_070578.1	5177968	T	C
NC_070578.1	5178812	C	CA
NC_070578.1	5178922	C	T
NC_070578.1	5180159	C	A
NC_070578.1	5180787	T	A
NC_070578.1	5181921	G	A
NC_070578.1	5183002	T	A
NC_070578.1	5184787	GA	G
NC_070578.1	5186574	A	C
NC_070578.1	5187886	CA	C
NC_070578.1	5189113	C	T
NC_070578.1	5192419	CAT	C
NC_070578.1	5193813	G	C
NC_070578.1	5197200	A	T
NC_070578.1	5204009	G	A
NC_070578.1	5204213	TAGGATTTTA	T
NC_070578.1	5204225	GCAATTATTTTGTTGTT	G
NC_070578.1	5204986	A	AGTGGTAAGC
NC_070578.1	5205089	C	T
NC_070578.1	5206819	C	T
NC_070578.1	5208154	C	A
NC_070578.1	5208287	A	T
NC_070578.1	5208337	A	C
NC_070578.1	5208521	T	G
NC_070578.1	5208704	T	C
NC_070578.1	5209327	C	T
NC_070578.1	5209446	G	A
NC_070578.1	5209624	C	T
NC_070578.1	5209919	G	A
NC_070578.1	5209982	G	A
NC_070578.1	5210057	T	G
NC_070578.1	5210472	GGCAGCA	G
NC_070578.1	5213706	A	AT
NC_070578.1	5217663	C	T
NC_070578.1	5220092	C	A
NC_070578.1	5221057	A	G
NC_070578.1	5222079	G	C
NC_070578.1	5223547	G	GATAT
NC_070578.1	5226970	C	T
NC_070578.1	5229804	A	AGATCCCT
NC_070578.1	5231889	C	CT
NC_070578.1	5234972	GT	G
NC_070578.1	5236430	C	T
NC_070578.1	5240184	G	T
NC_070578.1	5241771	C	A
NC_070578.1	5243217	T	TA
NC_070578.1	5243251	A	G
NC_070578.1	5243729	T	A
NC_070578.1	5244449	T	A
NC_070578.1	5244873	G	A
NC_070578.1	5245392	A	C
NC_070578.1	5245395	G	A
NC_070578.1	5245804	A	T
NC_070578.1	5245890	T	C
NC_070578.1	5246070	C	A
NC_070578.1	5246869	G	A
NC_070578.1	5247303	A	G
NC_070578.1	5248062	A	AT
NC_070578.1	5248063	A	T
NC_070578.1	5249230	C	CTT
NC_070578.1	5249594	GGTGTGTGTGTGTGT	G
NC_070578.1	5250513	G	GGGTTAGGGTTA
NC_070578.1	5254158	G	A
NC_070578.1	5254684	A	ACACACC
NC_070578.1	5255755	C	CA
NC_070578.1	5255897	C	T
NC_070578.1	5256577	C	T
NC_070578.1	5258638	C	T
NC_070578.1	5259790	T	A
NC_070578.1	5263013	TCATTAAG	T
NC_070578.1	5263419	GTT	G
NC_070578.1	5267731	G	A
NC_070578.1	5275695	C	T
NC_070578.1	5276706	C	A
NC_070578.1	5281557	T	A
NC_070578.1	5282124	A	G
NC_070578.1	5283023	A	G
NC_070578.1	5284271	A	G
NC_070578.1	5287318	G	T
NC_070578.1	5288167	G	T
NC_070578.1	5288229	CAGCTCTTCTAGACTAGGCTTTTTAGGCT	C
NC_070578.1	5290270	T	G
NC_070578.1	5291804	A	T
NC_070578.1	5291887	C	T
NC_070578.1	5291919	T	G
NC_070578.1	5292348	G	T
NC_070578.1	5294550	G	C
NC_070578.1	5294952	CAAAATAAAATA	C
NC_070578.1	5295030	A	G
NC_070578.1	5295045	T	G
NC_070578.1	5296347	A	C
NC_070578.1	5297399	T	C
NC_070578.1	5298555	A	G
NC_070578.1	5299110	C	G
NC_070578.1	5299113	G	C
NC_070578.1	5300142	C	T
NC_070578.1	5300470	C	G
NC_070578.1	5300744	A	G
NC_070578.1	5302379	A	G
NC_070578.1	5304404	T	C
NC_070578.1	5304953	CTCTATCTGTTTTT	C
NC_070578.1	5304969	AC	A
NC_070578.1	5304971	GGAGAACTAAATGATAAACAGA	G
NC_070578.1	5307063	C	A
NC_070578.1	5307420	T	C
NC_070578.1	5308317	G	GT
NC_070578.1	5310403	A	C
NC_070578.1	5310872	G	C
NC_070578.1	5311872	G	A
NC_070578.1	5312388	C	T
NC_070578.1	5312431	A	T
NC_070578.1	5314576	C	T
NC_070578.1	5315337	A	G
NC_070578.1	5315364	T	G
NC_070578.1	5315638	CAGGTCAATTTAGTATGATTGCATAGACAAAAAAAA	C
NC_070578.1	5315734	CTATCT	C
NC_070578.1	5316590	C	A
NC_070578.1	5317398	GT	G
NC_070578.1	5317772	TTC	T
NC_070578.1	5317775	GACCAGC	G
NC_070578.1	5317784	G	A
NC_070578.1	5318337	G	A
NC_070578.1	5318845	CACTT	C
NC_070578.1	5319310	GT	G
NC_070578.1	5319906	C	T
NC_070578.1	5319941	C	T
NC_070578.1	5320799	G	A
NC_070578.1	5321205	TCTGCCTGAGTTGATAA	T
NC_070578.1	5321833	C	T
NC_070578.1	5322506	A	G
NC_070578.1	5322734	T	G
NC_070578.1	5323414	G	T
NC_070578.1	5324429	C	A
NC_070578.1	5324711	C	CA
NC_070578.1	5325261	C	T
NC_070578.1	5326406	GAC	G
NC_070578.1	5327077	A	G
NC_070578.1	5327107	C	T
NC_070578.1	5327951	C	T
NC_070578.1	5331223	C	G
NC_070578.1	5331346	T	C
NC_070578.1	5331371	GCTGATATC	G
NC_070578.1	5331406	C	T
NC_070578.1	5333912	C	A
NC_070578.1	5334097	C	T
NC_070578.1	5335551	A	C
NC_070578.1	5335934	G	A
NC_070578.1	5336724	AGGGCAGG	A
NC_070578.1	5336732	A	T
NC_070578.1	5337341	A	AC
NC_070578.1	5337342	A	ACAC
NC_070578.1	5337510	C	A
NC_070578.1	5337605	A	T
NC_070578.1	5337630	T	C
NC_070578.1	5339042	G	A
NC_070578.1	5339071	T	G
NC_070578.1	5339141	C	T
NC_070578.1	5340247	GTAAAGTGTGACC	G
NC_070578.1	5340377	C	T
NC_070578.1	5340720	T	C
NC_070578.1	5340842	A	T
NC_070578.1	5342493	C	CT
NC_070578.1	5343564	G	A
NC_070578.1	5344167	T	G
NC_070578.1	5344765	G	A
NC_070578.1	5346389	C	T
NC_070578.1	5347439	C	T
NC_070578.1	5352057	A	G
NC_070578.1	5352334	T	A
NC_070578.1	5353550	C	T
NC_070578.1	5354500	G	C
NC_070578.1	5355072	T	G
NC_070578.1	5355073	G	A
NC_070578.1	5355374	A	G
NC_070578.1	5355567	A	G
NC_070578.1	5356961	G	A
NC_070578.1	5357934	A	G
NC_070578.1	5358117	GGTA	G
NC_070578.1	5358509	G	A
NC_070578.1	5358580	G	A
NC_070578.1	5358699	A	G
NC_070578.1	5358707	C	T
NC_070578.1	5359199	C	T
NC_070578.1	5363250	G	A
NC_070578.1	5363844	AC	A
NC_070578.1	5363846	ACACACACACACACACACACACACAC	A
NC_070578.1	5366163	G	GTATAT
NC_070578.1	5366164	AC	A
NC_070578.1	5369883	C	T
NC_070578.1	5369987	A	T
NC_070578.1	5372571	TGTGAA	T
NC_070578.1	5374752	A	G
NC_070578.1	5374975	CCCCTA	*
NC_070578.1	5374982	GCCGACACGGACCC	*
NC_070578.1	5375115	T	G
NC_070578.1	5375301	G	A
NC_070578.1	5376896	AAAT	A
NC_070578.1	5379368	A	G
NC_070578.1	5379749	T	A
NC_070578.1	5380458	C	T
NC_070578.1	5381926	A	G
NC_070578.1	5382130	T	A
NC_070578.1	5382810	T	TA
NC_070578.1	5383363	A	G
NC_070578.1	5383513	A	C
NC_070578.1	5383804	C	CA
NC_070578.1	5384682	G	A
NC_070578.1	5387431	G	T
NC_070578.1	5388158	C	T
NC_070578.1	5388867	C	CCACACACACA
NC_070578.1	5390000	TA	T
NC_070578.1	5390294	C	T
NC_070578.1	5392292	A	G
NC_070578.1	5394453	A	C
NC_070578.1	5394823	G	A
NC_070578.1	5395553	A	C
NC_070578.1	5395666	C	A
NC_070578.1	5396214	T	G
NC_070578.1	5397906	T	C
NC_070578.1	5403192	G	GTT
NC_070578.1	5403323	C	CTTTTT
NC_070578.1	5404878	ACTC	A
NC_070578.1	5406049	A	G
NC_070578.1	5406649	A	AG
NC_070578.1	5406652	C	T
NC_070578.1	5406966	C	T
NC_070578.1	5407772	T	C
NC_070578.1	5407970	A	G
NC_070578.1	5408765	TTAGCCA	T
NC_070578.1	5409100	G	T
NC_070578.1	5409193	G	A
NC_070578.1	5410185	C	CTG
NC_070578.1	5410871	G	T
NC_070578.1	5411474	A	T
NC_070578.1	5412408	A	T
NC_070578.1	5413303	T	G
NC_070578.1	5414232	T	C
NC_070578.1	5414727	G	A
NC_070578.1	5415666	G	A
NC_070578.1	5418259	T	C
NC_070578.1	5418295	G	A
NC_070578.1	5419788	A	C
NC_070578.1	5419839	T	TA
NC_070578.1	5420039	C	T
NC_070578.1	5420041	G	T
NC_070578.1	5420056	G	A
NC_070578.1	5420112	C	CA
NC_070578.1	5423592	A	ACTTCTTCTT
NC_070578.1	5423612	A	T
NC_070578.1	5427306	C	T
NC_070578.1	5427888	C	T
NC_070578.1	5428013	G	T
NC_070578.1	5428126	CTGCCAGCAT	C
NC_070578.1	5429593	C	T
NC_070578.1	5430681	C	G
NC_070578.1	5431367	T	C
NC_070578.1	5433033	G	C
NC_070578.1	5436007	A	C
NC_070578.1	5439412	A	G
NC_070578.1	5440064	GAGTAGACAA	G
NC_070578.1	5440763	TTTA	T
NC_070578.1	5440802	C	A
NC_070578.1	5440806	T	A
NC_070578.1	5441262	G	T
NC_070578.1	5442405	A	T
NC_070578.1	5442720	G	A
NC_070578.1	5442934	C	A
NC_070578.1	5443229	A	C
NC_070578.1	5447706	A	G
NC_070578.1	5449614	G	GACACACACACACAC
NC_070578.1	5455770	GTCTCTCTCTCTCTCTCTCTCTCTCTC	G
NC_070578.1	5456191	T	C
NC_070578.1	5456293	T	A
NC_070578.1	5461651	TC	T
NC_070578.1	5461654	A	G
NC_070578.1	5461655	A	AGT
NC_070578.1	5470125	C	T
NC_070578.1	5470595	T	C
NC_070578.1	5475669	T	G
NC_070578.1	5475838	G	A
NC_070578.1	5476700	G	A
NC_070578.1	5478152	T	C
NC_070578.1	5478269	G	T
NC_070578.1	5478270	A	T
NC_070578.1	5478440	T	C
NC_070578.1	5479756	C	T
NC_070578.1	5481129	G	A
NC_070578.1	5482593	C	T
NC_070578.1	5483277	G	T
NC_070578.1	5483482	G	T
NC_070578.1	5483593	G	C
NC_070578.1	5484021	G	T
NC_070578.1	5484869	C	T
NC_070578.1	5486287	T	C
NC_070578.1	5486699	T	C
NC_070578.1	5487691	C	A
NC_070578.1	5489571	C	T
NC_070578.1	5492516	G	T
NC_070578.1	5495187	A	C
NC_070578.1	5496068	A	G
NC_070578.1	5496275	C	T
NC_070578.1	5496319	G	A
NC_070578.1	5496589	TCA	T
NC_070578.1	5496760	CTAATA	C
NC_070578.1	5496790	A	G
NC_070578.1	5497201	ATT	A
NC_070578.1	5497610	G	A
NC_070578.1	5497781	C	T
NC_070578.1	5499373	C	T
NC_070578.1	5499690	C	T
NC_070578.1	5502709	G	T
NC_070578.1	5503103	CACTATCTTTGTTA	C
NC_070578.1	5503682	G	A
NC_070578.1	5503852	G	A
NC_070578.1	5505537	A	T
NC_070578.1	5505879	T	C
NC_070578.1	5510024	C	A
NC_070578.1	5510807	G	A
NC_070578.1	5511088	T	C
NC_070578.1	5511533	G	T
NC_070578.1	5512110	A	T
NC_070578.1	5512111	C	A
NC_070578.1	5513466	T	C
NC_070578.1	5513826	C	T
NC_070578.1	5514021	G	A
NC_070578.1	5514818	T	TG
NC_070578.1	5515274	T	A
NC_070578.1	5516330	C	T
NC_070578.1	5518900	C	A
NC_070578.1	5519828	A	T
NC_070578.1	5519856	A	G
NC_070578.1	5519939	C	T
NC_070578.1	5520173	T	C
NC_070578.1	5522069	TCAAATAG	T
NC_070578.1	5522296	C	T
NC_070578.1	5524763	C	T
NC_070578.1	5524851	C	T
NC_070578.1	5525294	C	A
NC_070578.1	5526221	C	T
NC_070578.1	5526869	A	T
NC_070578.1	5527212	G	A
NC_070578.1	5527223	A	T
NC_070578.1	5528184	C	T
NC_070578.1	5528564	ATGATGT	A
NC_070578.1	5531278	T	G
NC_070578.1	5531457	C	A
NC_070578.1	5531564	A	G
NC_070578.1	5531910	C	T
NC_070578.1	5532444	A	T
NC_070578.1	5533197	A	G
NC_070578.1	5535166	G	T
NC_070578.1	5535845	TAC	T
NC_070578.1	5535853	G	A
NC_070578.1	5536711	C	T
NC_070578.1	5537363	G	A
NC_070578.1	5537923	C	T
NC_070578.1	5538276	T	C
NC_070578.1	5539215	T	C
NC_070578.1	5539763	G	A
NC_070578.1	5539944	T	G
NC_070578.1	5539946	A	ATG
NC_070578.1	5539947	C	T
NC_070578.1	5539948	A	AT
NC_070578.1	5541146	T	A
NC_070578.1	5541852	C	T
NC_070578.1	5541956	T	TA
NC_070578.1	5541965	C	A
NC_070578.1	5542053	A	T
NC_070578.1	5542056	A	T
NC_070578.1	5542138	A	C
NC_070578.1	5542352	A	C
NC_070578.1	5542537	C	T
NC_070578.1	5543341	C	T
NC_070578.1	5543815	C	T
NC_070578.1	5544046	C	G
NC_070578.1	5547197	C	A
NC_070578.1	5548714	C	T
NC_070578.1	5549751	G	A
NC_070578.1	5551598	T	G
NC_070578.1	5552681	A	C
NC_070578.1	5554798	A	AAC
NC_070578.1	5555332	A	G
NC_070578.1	5557587	A	C
NC_070578.1	5557750	A	T
NC_070578.1	5559894	A	G
NC_070578.1	5560422	C	A
NC_070578.1	5560866	T	G
NC_070578.1	5561320	G	A
NC_070578.1	5562144	C	A
NC_070578.1	5562249	G	A
NC_070578.1	5562409	G	T
NC_070578.1	5562423	GAC	G
NC_070578.1	5562519	T	C
NC_070578.1	5562598	G	T
NC_070578.1	5562610	A	T
NC_070578.1	5563033	T	TAAG
NC_070578.1	5563061	T	TA
NC_070578.1	5563062	T	A
NC_070578.1	5564063	A	C
NC_070578.1	5564222	T	C
NC_070578.1	5564895	T	C
NC_070578.1	5567082	TG	T
NC_070578.1	5567097	A	C
NC_070578.1	5567358	A	T
NC_070578.1	5569298	C	A
NC_070578.1	5571040	C	CTGA
NC_070578.1	5571164	G	A
NC_070578.1	5573552	A	G
NC_070578.1	5573580	A	ATAGGCC
NC_070578.1	5573759	G	A
NC_070578.1	5574156	A	G
NC_070578.1	5574558	A	G
NC_070578.1	5578550	T	C
NC_070578.1	5579550	C	T
NC_070578.1	5580670	TGA	T
NC_070578.1	5581168	A	T
NC_070578.1	5581284	C	T
NC_070578.1	5581475	G	A
NC_070578.1	5581694	C	T
NC_070578.1	5582718	TA	T
NC_070578.1	5583504	T	A
NC_070578.1	5584568	TTAA	T
NC_070578.1	5584572	A	G
NC_070578.1	5584966	G	T
NC_070578.1	5586080	G	T
NC_070578.1	5586976	C	T
NC_070578.1	5587013	T	A
NC_070578.1	5587180	C	T
NC_070578.1	5587191	C	T
NC_070578.1	5587281	T	C
NC_070578.1	5588326	T	C
NC_070578.1	5588430	G	A
NC_070578.1	5590750	G	A
NC_070578.1	5590990	GACAA	G
NC_070578.1	5591445	C	T
NC_070578.1	5591756	AT	A
NC_070578.1	5593166	CTCTCTTAGGG	C
NC_070578.1	5594380	G	A
NC_070578.1	5599979	G	T
NC_070578.1	5604267	AT	A
NC_070578.1	5605326	TATAA	T
NC_070578.1	5606031	T	C
NC_070578.1	5606032	GCAAAATTC	G
NC_070578.1	5606179	A	G
NC_070578.1	5606277	C	T
NC_070578.1	5606435	T	C
NC_070578.1	5607501	G	A
NC_070578.1	5607534	A	C
NC_070578.1	5607806	C	A
NC_070578.1	5608596	T	G
NC_070578.1	5608957	T	A
NC_070578.1	5609290	C	T
NC_070578.1	5610073	G	GT
NC_070578.1	5610623	CACACACACACACACACACACACACACACACACACACACACACAT	C
NC_070578.1	5611056	C	A
NC_070578.1	5611118	C	T
NC_070578.1	5611372	G	A
NC_070578.1	5612107	C	A
NC_070578.1	5612274	CCATTAACAATG	C
NC_070578.1	5612306	T	G
NC_070578.1	5612845	G	A
NC_070578.1	5613324	CT	C
NC_070578.1	5613821	C	T
NC_070578.1	5614258	A	G
NC_070578.1	5614360	TAATAATGTTTTGCC	T
NC_070578.1	5614497	G	A
NC_070578.1	5614607	T	C
NC_070578.1	5615003	T	C
NC_070578.1	5615215	G	A
NC_070578.1	5615247	G	A
NC_070578.1	5615718	GTGT	G
NC_070578.1	5615913	T	C
NC_070578.1	5617802	A	G
NC_070578.1	5618333	T	C
NC_070578.1	5618752	C	T
NC_070578.1	5618797	C	T
NC_070578.1	5619554	C	CA
NC_070578.1	5620189	G	A
NC_070578.1	5620251	G	A
NC_070578.1	5620337	TTAGATAGATAGATAGATAGATAGATAGATAGA	T
NC_070578.1	5623671	T	G
NC_070578.1	5627778	C	T
NC_070578.1	5673117	G	A
NC_070578.1	5681084	C	A
NC_070578.1	5691990	T	A
NC_070578.1	5706258	C	T
NC_070578.1	5708024	A	G
NC_070578.1	5713322	C	T
NC_070578.1	5713951	G	T
NC_070578.1	5713956	G	A
NC_070578.1	5728395	T	C
NC_070578.1	5738416	A	T
NC_070578.1	5769548	A	G
NC_070578.1	5769818	ACCTCAAG	A
NC_070578.1	5790916	A	T
NC_070578.1	5793743	T	C
NC_070578.1	5868838	T	TCA
NC_070578.1	5869404	AGCACATACAT	A
NC_070578.1	5869432	T	C
NC_070578.1	5872147	A	C
[truncated: 894,196+ more rows]
