# Supplementary material for: Genome-wide off-target assessment on the arginine vasotocin receptor V1a2 knockout Scomber japonicus (chub mackerel)
Source: Research Square preprint supplement (doi:10.21203/rs.3.rs-7219894/v1), 2025-09-22
Supplement: Supplementary file 2 [file 0ced45416629cf9b2af0d75e.xlsx]

## Sheet: Table2
	Total reads	Mapped reads	Called Variants	Called Variants/ Mapped read (%)	Common Variants （Only V1a2）	Specific Variants
V1a2 -KO-F1	161329646	78927269	7690386	9.74	3959178	896196
V1a2 -KO-F5	159660030	75885633	7538208	9.94
V1a2 -KO-M1	149966212	70503876	7458589	10.6
V1a2 -KO-M4	137905856	67232147	7394934	11
Q-saba-Female	780774690	458545005	11528230	2.51	―	―
Q-saba-F-pool	232402844	154637478	9731622	6.29
Q-saba-M-pool	238745270	164182076	9711894	5.92
Q-saba-L-pool	239377284	72672063	8258318	11.4
Q-saba-S-pool	254619262	96449204	8732627	9.05

## Sheet: Table3
chr	variants_locus	ref_seq_NCBI	V1a2-KO_seq	TAL 1	TAL 2	TAL 1 Score	TAL 2 Score	TAL 1 Start	TAL 2 Start	Spacer Length	TAL 1 Target_mismach	TAL 2 Target_mismach	Total Score	Annotation_TYPE(priority:CDS>exon>gene>transcript), CDS&exon: Exonic	Gene_Name
NC_070582.1	15733001	CCTGCAGAGGAAGT	C	RVD2	RVD1	7.33	5.43	15732984	15733031	15	0	0	12.76	CDS	gene_id "avpr1aa"; transcript_id "XM_053319488.1"; db_xref "GeneID:128359070"; gbkey "CDS"; gene "avpr1aa"; product "arginine vasopressin receptor 1Aa"; protein_id "XP_053175463.1"; exon_number "1";
NC_070583.1	6575363	C	T	RVD2	RVD2	11.84	14.66	6575345	6575398	22	5	8	26.5	gene	gene_id "ubash3bb"; transcript_id ""; db_xref "GeneID:128360213"; description "ubiquitin associated and SH3 domain containing Bb"; gbkey "Gene"; gene "ubash3bb"; gene_biotype "protein_coding";
NC_070598.1	17149066	G	A	RVD2	RVD2	10.82	16.55	17149043	17149094	20	4	7	27.37	none
NC_070586.1	13107433	C	A	RVD2	RVD1	12.83	15.52	13107402	13107454	20	5	5	28.35	gene	gene_id "LOC128365227"; transcript_id ""; db_xref "GeneID:128365227"; description "selenocysteine insertion sequence-binding protein 2-like"; gbkey "Gene"; gene "LOC128365227"; gene_biotype "protein_coding";
NC_070589.1	7330615	A	C	RVD2	RVD2	15.1	13.65	7330584	7330640	25	7	5	28.75	gene	gene_id "klhl20"; transcript_id ""; db_xref "GeneID:128368515"; description "kelch-like family member 20"; gbkey "Gene"; gene "klhl20"; gene_biotype "protein_coding";
NC_070578.1	18297753	G	T	RVD2	RVD2	14.68	14.68	18297727	18297780	22	5	5	29.36	none
NC_070601.1	2434359	TTTTATATATTTATATA	T	RVD2	RVD2	15	14.7	2434324	2434379	24	6	8	29.7	gene	gene_id "LOC128354623"; transcript_id "XM_053314847.1"; db_xref "GeneID:128354623"; exception "unclassified transcription discrepancy"; gbkey "mRNA"; gene "LOC128354623"; model_evidence "Supporting evidence includes similarity to: 17 Proteins"; note "The sequence of the model RefSeq transcript was modified relative to this genomic sequence to represent the inferred CDS: deleted 1 base in 1 codon"…
NC_070594.1	16507759	A	G	RVD2	RVD2	13.94	15.97	16507738	16507791	22	3	6	29.91	none
NC_070583.1	13334141	A	C	RVD2	RVD2	17.98	11.93	13334120	13334175	24	6	5	29.91	gene	gene_id "si"; transcript_id ""; db_xref "GeneID:128360105"; description "sucrase-isomaltase (alpha-glucosidase)"; gbkey "Gene"; gene "si"; gene_biotype "protein_coding";
NC_070586.1	29957874	C	A	RVD2	RVD2	19.22	10.92	29957845	29957900	24	8	4	30.14	gene	gene_id "cabin1"; transcript_id ""; db_xref "GeneID:128365072"; description "calcineurin binding protein 1"; gbkey "Gene"; gene "cabin1"; gene_biotype "protein_coding";
NC_070582.1	27798456	C	T	RVD2	RVD2	13.57	16.61	27798427	27798483	25	4	5	30.18	none
NC_070582.1	14585891	G	A	RVD2	RVD2	17.09	13.19	14585861	14585917	25	7	7	30.28	none
NC_070580.1	15552975	G	A	RVD2	RVD2	18.01	12.52	15552956	15553000	13	8	5	30.53	none
NC_070587.1	23770138	A	T	RVD2	RVD1	18.57	12.1	23770113	23770164	19	8	5	30.67	none
NC_070579.1	21541349	T	TATATATATATAATTA	RVD2	RVD2	17.6	13.08	21541320	21541367	16	8	5	30.68	gene	gene_id "polq"; transcript_id "XM_053330268.1"; db_xref "GeneID:128369258"; gbkey "mRNA"; gene "polq"; model_evidence "Supporting evidence includes similarity to: 5 Proteins"; product "polymerase (DNA directed)
NC_070593.1	14876658	C	A	RVD2	RVD2	14.17	16.53	14876637	14876685	17	7	7	30.7	gene	gene_id "tcf21"; transcript_id "XM_053337049.1"; db_xref "GeneID:128377142"; gbkey "mRNA"; gene "tcf21"; model_evidence "Supporting evidence includes similarity to: 18 Proteins"; product "transcription factor 21"; transcript_biotype "mRNA";
NC_070594.1	8749170	T	C	RVD2	RVD2	17.65	13.11	8749153	8749195	11	9	5	30.76	none
NC_070590.1	17280884	T	A	RVD2	RVD2	11.68	19.08	17280850	17280900	19	4	9	30.76	none
NC_070595.1	10719049	AT	A	RVD2	RVD2	17.93	12.83	10719016	10719068	21	8	5	30.76	gene	gene_id "smurf1"; transcript_id "XM_053337786.1"; db_xref "GeneID:128378310"; experiment "COORDINATES: polyA evidence [ECO:0006239]"; gbkey "mRNA"; gene "smurf1"; model_evidence "Supporting evidence includes similarity to: 42 Proteins"; product "SMAD specific E3 ubiquitin protein ligase 1
NC_070578.1	14156131	C	T	RVD2	RVD2	16.47	14.3	14156110	14156159	18	8	6	30.77	gene	gene_id "scamp5b"; transcript_id "XM_053316257.1"; db_xref "GeneID:128355848"; gbkey "mRNA"; gene "scamp5b"; model_evidence "Supporting evidence includes similarity to: 20 Proteins"; product "secretory carrier membrane protein 5b"; transcript_biotype "mRNA";
NC_070582.1	9244850	CAT	C	RVD2	RVD2	12.83	17.96	9244828	9244880	21	5	7	30.79	gene	gene_id "LOC128359088"; transcript_id ""; db_xref "GeneID:128359088"; description "dynein axonemal intermediate chain 4-like"; gbkey "Gene"; gene "LOC128359088"; gene_biotype "protein_coding";
NC_070582.1	20106016	GTGAGT	G	RVD2	RVD1	18.05	12.77	20105995	20106043	16	5	5	30.82	gene	gene_id "shank3a"; transcript_id "XR_008321421.1"; db_xref "GeneID:128358999"; gbkey "misc_RNA"; gene "shank3a"; model_evidence "Supporting evidence includes similarity to: 31 Proteins"; product "SH3 and multiple ankyrin repeat domains 3a
NC_070582.1	17928269	T	TGTGTGTGTGTGTGTGTGTGTGTGTGTGTGTCAGTGAGTGAGTGAGTGA	RVD2	RVD2	14.5	16.34	17928243	17928297	23	4	6	30.84	none
NC_070593.1	13421735	G	T	RVD2	RVD2	9.18	21.71	13421700	13421752	21	5	8	30.89	none
